# Supplementary material for: What matters most to patients about primary healthcare: mixed-methods patient priority setting exercises within the PREFeR (PRioritiEs For Research) project
Source: PubMed Central journal article supplement — BMJ Open. 2019 Jul 9;9(7):e025954. doi: 10.1136/bmjopen-2018-025954 (PMC6624027; doi:10.1136/bmjopen-2018-025954), 2019-07-09
Supplement: bmjopen-2018-025954.draft_revisions.pdf [file bmjopen-2018-025954.draft_revisions.pdf]

# BMJ Open

BMJ Open is committed to open peer review. As part of this commitment we make the peer review history of every article we publish publicly available.

When an article is published we post the peer reviewers' comments and the authors' responses online. We also post the versions of the paper that were used during peer review. These are the versions that the peer review comments apply to.

The versions of the paper that follow are the versions that were submitted during the peer review process. They are not the versions of record or the final published versions. They should not be cited or distributed as the published version of this manuscript.

BMJ Open is an open access journal and the full, final, typeset and author-corrected version of record of the manuscript is available on our site with no access controls, subscription charges or pay-per-view fees (<http://bmjopen.bmj.com>).

If you have any questions on BMJ Open's open peer review process please email [info.bmjopen@bmj.com](mailto:info.bmjopen@bmj.com)

# BMJ Open

## What matters most to patients about primary health care: Patient priority setting exercises within the PREFeR (PRioritiEs For Research) Project

|                               |                                                                                                                                                                                                                                                                                                                                                                                                                                                                                                                                                                                                |
|-------------------------------|------------------------------------------------------------------------------------------------------------------------------------------------------------------------------------------------------------------------------------------------------------------------------------------------------------------------------------------------------------------------------------------------------------------------------------------------------------------------------------------------------------------------------------------------------------------------------------------------|
| Journal:                      | <i>BMJ Open</i>                                                                                                                                                                                                                                                                                                                                                                                                                                                                                                                                                                                |
| Manuscript ID                 | bmjopen-2018-025954                                                                                                                                                                                                                                                                                                                                                                                                                                                                                                                                                                            |
| Article Type:                 | Research                                                                                                                                                                                                                                                                                                                                                                                                                                                                                                                                                                                       |
| Date Submitted by the Author: | 09-Aug-2018                                                                                                                                                                                                                                                                                                                                                                                                                                                                                                                                                                                    |
| Complete List of Authors:     | Edwards, Louisa; Simon Fraser University, Faculty of Health Sciences; Centre for Clinical Epidemiology and Evaluation<br>Monro, Melody; Fraser Health Authority<br>Butterfield, Yaron; BC Primary Health Care Research Network Patient Advisory<br>Johl, Ravin; BC Primary Health Care Research Network Patient Advisory<br>Loftsgard, Kent; BC Primary Health Care Research Network Patient Advisory<br>Pelletier, Hayley; BC Primary Health Care Research Network Patient Advisory<br>McGavin, Colleen; BC SUPPORT Unit<br>Lavergne, M.; Simon Fraser University, Faculty of Health Sciences |
| Keywords:                     | patient engagement, priority setting, primary health care, Dialogue Model                                                                                                                                                                                                                                                                                                                                                                                                                                                                                                                      |
|                               |                                                                                                                                                                                                                                                                                                                                                                                                                                                                                                                                                                                                |

SCHOLARONE™  
Manuscripts

1  
2  
3  
4  
5  
6  
7  
8  
9  
10  
11  
12  
13  
14  
15  
16  
17  
18  
19  
20  
21  
22  
23  
24  
25

# What matters most to patients about primary health care: Patient priority setting exercises within the PREFeR (PRioritiEs For Research) Project

26 Louisa Edwards<sup>1,2</sup>, Melody Monro<sup>3</sup>, Yaron Butterfield<sup>4</sup>, Ravin Johl<sup>4</sup>, Kent Cadogan Loftsgard<sup>4</sup>,

27  
28 Hayley Pelletier<sup>4</sup>, Colleen McGavin<sup>5</sup>, M. Ruth Lavergne<sup>1</sup>

29  
30  
31  
32 **Corresponding author:**

33  
34 M. Ruth Lavergne

35  
36 Simon Fraser University

37  
38 Faculty of Health Sciences

39  
40 8888 University Drive

41  
42 Blusson Hall, Room 10502

43  
44 Burnaby, BC

45  
46 V5A 1S6

47  
48  
49  
50  
51 Phone: +1-778-782-3937 | Email: [ruth\\_lavergne@sfu.ca](mailto:ruth_lavergne@sfu.ca)

52  
53  
54 **Author affiliations:**

1  
2  
3 <sup>1</sup> Faculty of Health Sciences, Simon Fraser University, Burnaby, Canada  
4  
5

6 <sup>2</sup> Centre for Clinical Epidemiology and Evaluation, Vancouver Coastal Health Research Institute,  
7  
8  
9 Vancouver, British Columbia, Canada  
10

11  
12 <sup>3</sup> Fraser Health Authority, Surrey, Canada  
13

14  
15 <sup>4</sup> BC Primary Health Care Research Network Patient Advisory, Vancouver, Canada  
16

17  
18 <sup>5</sup> BC SUPPORT Unit, Vancouver, Canada  
19  
20

21  
22  
23  
24 **Word count: 4691**  
25  
26  
27  
28  
29  
30  
31  
32  
33  
34  
35  
36  
37  
38  
39  
40  
41  
42  
43  
44  
45  
46  
47  
48  
49  
50  
51  
52  
53  
54  
55  
56  
57  
58  
59  
60

## Abstract

**Objectives:** To identify patient-generated priority topics for future primary care research in British Columbia (BC), Canada within a diverse patient population.

**Design:** Mixed methods priority setting exercises framed by the Dialogue Model, using the Nominal Group Technique (rank-ordered scoring).

**Setting:** BC, Canada

**Participants:** 10 patient partners (7 female, 3 male) from the BC Primary Health Care Research Network Patient Advisory.

**Results:** The 10 members recruited to the Patient Advisory provided over 80 experiences of what stood out for them in BC primary care, which were grouped thematically into 18 topics. Among the top 10 patient-ranked topics, *patient-centred care, information sharing (including electronic medical records), and lack of regular primary care provider* scored highest.

1  
2  
3  
4 **Conclusions:** The project activities to date demonstrate the feasibility of including patients in  
5  
6  
7 priority setting exercises for primary health care in general, rather than focusing on a condition-  
8  
9 specific population or disease area. The Dialogue Model provided a useful framework in this  
10  
11 context. Several patient-generated topics had not been previously identified by policymakers or  
12  
13 researchers, underscoring the importance of including patients in research priority setting. The  
14  
15 project activities that follow (online surveys, rapid literature reviews, and a multi-stakeholder  
16  
17 dialogue discussion) will finalize the list of patient priority topics amongst a broader patient  
18  
19 population, will indicate patient-primary care provider alignment in topic importance ratings,  
20  
21 and highlight under-researched topic areas. Future projects will develop patient-identified  
22  
23 priorities into specific research questions.  
24  
25  
26  
27  
28  
29  
30  
31

32 **Keywords:** patient engagement, priority setting, primary health care, Dialogue Model  
33  
34  
35  
36  
37  
38  
39  
40  
41  
42  
43  
44  
45  
46  
47  
48  
49  
50  
51  
52  
53  
54  
55  
56  
57  
58  
59  
60

## ARTICLE SUMMARY

### Strengths and limitations of this study

- This is the first-known patient priority setting project that addresses primary health care issues in general, rather than focusing on a particular health condition or issue.
- The project is framed within the Dialogue Model, which is a multi-stage, multi-stakeholder structured priority setting framework, and makes use of the Nominal Group Technique to foster idea generation and decision-making.
- The Patient Advisory members who generated the top 10 patient priorities are a socio-demographically diverse group with varied prior research experience. They identified unique priority topics that have not emerged from similar exercises among policymakers or researchers, further highlighting the importance of patient engagement in priority setting.
- Generalizability of the current priority topics might be limited to this patient group, but they provide the groundwork for establishing the importance of these key issues in primary care amongst a larger patient and primary care provider population (using online surveys, rapid literature reviews, and a multi-stakeholder dialogue discussion).

## INTRODUCTION

Primary care is the first point of contact with health care for most patients, and supports a wide variety of health needs. It is not surprising, therefore, that a host of primary care research focuses on studying patient needs and gaps in care. However, patients are not frequently included in prioritizing research ideas[1–3]. At a basic level, this is problematic because patient, clinician, and researcher priorities may differ significantly[4]. At an applied level, intervention uptake and, consequently, any impact on health outcomes may suffer if the problems studied and outcomes suggested have not considered patients' perspectives, leading to research 'waste'[5]. Patient prioritization of topics for research ultimately benefits the intended end-users of primary health care directly – patients themselves – and makes better use of scarce resources.

There is growing recognition of the importance of involving patients in research priority setting. In response, there has been a proliferation of patient priority setting studies in recent years, with 70 articles from the UK, US, Canada, the Netherlands and Australia identified between 2007-2017 in a rapid systematic review of public and patient engagement in prioritization[6]. Yet, most processes for engaging patients in research have focused on populations defined by a specific condition[6,7], rather than primary care more generally. While there have been exercises to identify primary care research priorities at clinical and academic conferences[8], these did not include patients. We have only identified two recent publications that examined primary care priorities more generally – i.e., in which the overall focus was not specific to a particular health condition – and that involved patients as one of the multi-stakeholder



1  
2  
3 groups[9,10]. Even in these studies, the online survey[9] and World Café discussions[10]  
4  
5 targeted a specific health topic – how to promote healthy behaviours through primary care –  
6  
7 rather than allowing any issues relating to primary care experiences to emerge as priorities. In  
8  
9 order to examine gaps in care that affect a large and diverse range of patients, it is important to  
10  
11 enable patients to voice whatever primary health care priorities are most pressing for them.  
12  
13  
14  
15

16 There are a host of tools and techniques for priority setting. One recent methodological review  
17  
18 found roughly equal numbers of studies that used specific, structured frameworks and those  
19  
20 that used non-specific tools (e.g., surveys)[11]. In terms of structured approaches, there are  
21  
22 several multi-stage priority setting frameworks, such as the James Lind Alliance Priority Setting  
23  
24 Partnerships[12] and the Dialogue Model[1,13]. There does not appear to be a single, best  
25  
26 method[14], nor is there clear agreement on whether using a combination of tools for priority  
27  
28 setting is superior to using one technique alone[11]. However, use of a clearly defined approach  
29  
30 is recommended[11,15], and the choice of which method(s) may be best guided by the research  
31  
32 question[14]. The Cochrane Priority Setting Methods Group noted that researchers may adapt  
33  
34 and implement the same methods in different ways depending on the context and research  
35  
36 focus[16].  
37  
38  
39  
40  
41  
42  
43

44 Recognizing that patient engagement early in the research process is important, but has been  
45  
46 largely absent from priority setting exercises in primary care, the main aim of the PREFeR  
47  
48 (PRioritiEs For Research) Project was to identify patient-generated priorities for primary care  
49  
50 research in British Columbia (BC), Canada. The project specifically sought to determine the top  
51  
52 10 primary health care topics that were most important to patients in the province, with a view  
53  
54  
55  
56  
57  
58  
59  
60

1  
2  
3 to inform more focused research questions in the future. By focusing on topics that are of  
4  
5 importance to patients, research is more likely to have positive impacts on policy and practice.  
6  
7

8  
9 As noted in reviews[6,17], detail about methodology is often lacking in articles about priority  
10  
11 setting, and this is essential to replicating approaches and understanding how and what works  
12  
13 for patient engagement. The PREFeR Project is framed by the Dialogue Model, which is a multi-  
14  
15 stage priority setting framework involving multiple stakeholders, but expressly incorporates  
16  
17 patients' voices[1]. The main focus of this paper is on the methods and results from the initial  
18  
19 priority identification activities of PREFeR. We also overview the other project activities that are  
20  
21 couched within the later phases of the Dialogue Model, which correspond to secondary aims of  
22  
23 PREFeR: to compare patient and primary care provider perspectives using online surveys, to  
24  
25 assess whether research is already being conducted in BC on the key patient priorities through  
26  
27 rapid literature reviews and 'horizon scanning' surveys with BC researchers, and to qualitatively  
28  
29 explore where and why differences might occur in the survey results through a facilitated  
30  
31 discussion ('dialogue') with patients and providers. Taken together, results from these activities  
32  
33 are key considerations for setting future research questions.  
34  
35  
36  
37  
38  
39  
40  
41

## 42 **METHODS**

### 43 **Participants and recruitment**

44  
45  
46  
47 The BC Primary Health Care Research Network (BC-PHCRN) Patient Advisory (hereafter,  
48  
49 referred to as the Patient Advisory) was formed to engage patients in primary care research  
50  
51 and gather their input into multiple studies supported by the BC-PHCRN. Patients living  
52  
53  
54  
55  
56  
57  
58  
59  
60

1  
2  
3 throughout BC were recruited to the Patient Advisory through expression of interest calls  
4  
5 posted by the BC-PHCRN and Patient Voices Network, a network of patients and caregivers  
6  
7 interested in engagement opportunities with health care partners in British Columbia, and  
8  
9 through a patient engagement workshop at the Centre for Health Services and Policy Research  
10  
11 annual conference (Vancouver, BC, March 2017). Effort was taken to recruit patients from each  
12  
13 of the five regional health authorities, with a range of previous research experience and health  
14  
15 care needs, and a diverse mix of socio-demographic backgrounds. Given that the Patient  
16  
17 Advisory were research partners and the initial activities of PREFeR were considered  
18  
19 community consultation, ethics approval was not required by the Simon Fraser University  
20  
21 Research Ethics Board for the early phases of the project reported here.  
22  
23  
24  
25  
26  
27  
28

## 29 Patient and public involvement

30  
31  
32 The Patient Advisory were research partners in PREFeR and, therefore, contributed to planning  
33  
34 and shaping the research activities, and also provided input as participants to the priority  
35  
36 setting phase of this project, as described below.  
37  
38  
39

## 40 Overview of the Dialogue Model

41  
42  
43 Compared to the other structured priority setting frameworks, the five phases of the Dialogue  
44  
45 Model – Exploration, Consultation, Prioritization, Integration, and Programming and  
46  
47 Integration[1,13] – mapped most closely on to the overarching ethos of PREFeR (Figure 1). In  
48  
49 particular, the Dialogue Model is based on participatory and interactive approaches, which  
50  
51 advocate an equal partnership between patients and other stakeholders[1]. Through processes  
52  
53  
54  
55  
56  
57  
58  
59  
60

1  
2  
3 that encourage mutual learning, the Dialogue Model can lead to co-ownership of the priorities  
4 identified[1]. The model uses a variety of mixed methods (e.g., literature reviews, interviews,  
5 surveys) throughout the five phases, which we also identified as essential to the aims of  
6  
7  
8  
9  
10  
11  
12  
13  
14  
15  
16  
17  
18  
19  
20  
21  
22  
23  
24  
25  
26  
27  
28  
29  
30  
31  
32  
33  
34  
35  
36  
37  
38  
39  
40  
41  
42  
43  
44  
45  
46  
47  
48  
49  
50  
51  
52  
53  
54  
55  
56  
57  
58  
59  
60

that encourage mutual learning, the Dialogue Model can lead to co-ownership of the priorities identified[1]. The model uses a variety of mixed methods (e.g., literature reviews, interviews, surveys) throughout the five phases, which we also identified as essential to the aims of PREFeR. Commonly, these methods are grounded in other structured techniques. For example, focus groups may be framed within the Nominal Group Technique (NGT)[18], which is a widely-used method of idea generation, based on four key stages: individual and silent idea generation in response to the nominal question, round-robin feedback to the group (i.e., each person sequentially shares one idea at a time), group discussion and clarification of ideas, individual voting (ranking or rating of ideas)[19].

The five phases of the Dialogue Model were modified slightly to match the aims of PREFeR. For example, we chose to carry out rapid literature reviews, which are typically conducted in the Exploration phase, after the Consultation phase, and have labelled this as part 2 of the Exploration phase. We wanted the rapid literature reviews to inform the scope of what has already been researched within BC and Canada, since this would impact future research questions and their funding potential. Within the Dialogue Model, literature reviews may be undertaken for scoping purposes, and to directly shape subsequent activities within the model. Another divergence from the traditional Dialogue Model is that we chiefly focused on patient views in the Consultation phase, since the aim of PREFeR was to generate patient priorities. However, priorities from our other stakeholder group, primary care providers, were gathered and compared to patient priorities later in the project. As noted in the introduction, we will briefly overview all activities in PREFeR that map on to the phases of the Dialogue Model, but the primary focus of this paper is on the initial prioritization activities.

## Data collection

### Exploration phase (part 1) – Brainstorming primary care experiences

In the first activity of the project (within the Exploration phase), the Patient Advisory was sent an email request to brainstorm their ideas in response to the following question, “Based on your experiences of primary care, what things really stand out for you?” Primary care was defined as where most people go first for medical help and advice when they have a health problem, and provided by health care professionals, like family doctors, nurses or nurse practitioners, pharmacists or emergency services staff. The question was neutrally framed by design, such that either positive or negative experiences of primary care might emerge. Patient Advisory members were asked to spend about 10 minutes on the task and write down as many things that came to mind in response to this question. They were invited to a teleconference to share their ideas with the group approximately two weeks later. For those unable to attend, an opportunity to provide their thoughts through individual telephone calls with the first author prior to the scheduled teleconference was offered. With permission, these members’ primary care experiences were shared with the rest of the Patient Advisory during the teleconference.

The teleconference was led by the first author and facilitated by the second author. Using the Nominal Group Technique[18], each Patient Advisory member was asked to provide one idea at a time, in round-robin fashion, until there were no more new ideas to share. In line with NGT, patients were asked to first briefly describe their primary care experiences, with further explanation and discussion by the entire group to follow after all ideas had been listed. The

1  
2  
3 principal investigator (RL) took detailed notes throughout the teleconference, which were  
4  
5 emailed to the Patient Advisory the following day for their review.  
6  
7

8  
9 Based on the teleconference notes, the first author consolidated the raw list of brainstormed  
10  
11 ideas. Common elements were grouped thematically into topics. A heading for each topic was  
12  
13 constructed with a short phrase in lay language to reflect the underlying theme of the collection  
14  
15 of examples and experiences raised by the patients. The specific patient examples and  
16  
17 experiences were additionally provided in bullet form below each topic heading. After an initial  
18  
19 discussion with the second and last author, the topic list was refined and then emailed to the  
20  
21 Patient Advisory. The Patient Advisory was asked to review the list of topics ahead of an in-  
22  
23 person priority setting workshop, to ensure it reflected the teleconference discussion  
24  
25 accurately.  
26  
27  
28  
29  
30

### 31 Consultation and (Interim) Prioritization phases – Priority setting workshop

32  
33  
34 Three and a half weeks after the teleconference, a full-day priority setting workshop with the  
35  
36 Patient Advisory was held in Vancouver, BC. The purpose of the workshop was, firstly, to  
37  
38 review, discuss, revise, and agree on the list of the patient-generated primary care topics that  
39  
40 emerged out of the teleconference (Consultation phase), and then to have the patients  
41  
42 individually rank the top 10 most important topics ((Interim) Prioritization phase). Collectively,  
43  
44 this constituted the remaining steps of the NGT process, which followed from the initial stages  
45  
46 conducted during the teleconference.  
47  
48  
49  
50

51  
52 To arrive at a final, agreed upon list of primary care topics, the Patient Advisory was asked to  
53  
54 review the topics and consider: (1) the suitability of the topic label wording, (2) whether any  
55  
56  
57  
58  
59

1  
2  
3 topics were missed from the teleconference or new ideas had emerged since that discussion,  
4  
5 and (3) whether any additional topics should be separated out from the patient examples  
6  
7 and/or whether two or more topics could be grouped together. These points were discussed for  
8  
9 each topic in turn, making revisions on a projected screen in real time during the workshop.  
10  
11

12  
13  
14 Once the list of primary care topics was finalized, the group moved on to the second task of the  
15  
16 workshop – ranking the topics in terms of their importance. The final topic list was distributed  
17  
18 to the Patient Advisory, who were then asked to privately choose the 10 topics that were most  
19  
20 important to them personally. Personal importance could also include thinking about how the  
21  
22 issues might affect other people they were close to (e.g., family, friends). A recording sheet was  
23  
24 provided for patients to arrange their top 10 topics in terms of 1=*Most important* to 10=*Least*  
25  
26 *important*. Ties were not permitted. In line with NGT methods, patients were asked to  
27  
28 complete this task silently and on their own. The first author checked the ranking sheets for  
29  
30 completeness as they were collected.  
31  
32  
33  
34  
35

36  
37 The first author entered the patient-ranked data into an Excel spreadsheet, and then reverse  
38  
39 scored the data, such that 10=*Most important* and 1=*Least important*. Following the steps  
40  
41 outlined in McMillan et al.[19], results were pooled by first creating a sum of scores for each  
42  
43 topic, which indicated its ranked priority or strength of vote score[20]. Second, we computed  
44  
45 the relative importance of each topic[21], or the proportion (%) of scores ranked within the top  
46  
47 10 topics. As in McMillan et al.[19], this was calculated as: (total summed score for the  
48  
49 topic)/(maximum points for the group) x 100. The maximum number of points was given by the  
50  
51 number of patients providing rankings multiplied by the sum of the 10 ranks available to each  
52  
53  
54  
55  
56  
57  
58  
59  
60

1  
2  
3 patient (i.e.,  $10 + 9 + 8 + \dots + 1 = 55$  points). In order to resolve ties, a third method of tabulating  
4  
5 the ranks involved counting the number of times each topic was ranked within the top 10  
6  
7 across patients, which is an indication of topic popularity[19,20]. The data were then sorted  
8  
9 according to their ranked priority (proportion of scores within the top 10), and any ties were  
10  
11 resolved by referring to the frequency of votes. In this way, if two topics had the same ranked  
12  
13 priority, the topic with the higher number of votes was assigned the higher final ranked  
14  
15 position. By the end of the workshop, patients were informed of the pooled results, which  
16  
17 yielded the top 10 topics that the project would carry forward in a series of rapid literature  
18  
19 reviews, online surveys, and a final dialogue event between patients and primary care providers  
20  
21 (Figure 1). Methods for these activities will be briefly summarized next.  
22  
23  
24  
25  
26  
27  
28

### 29 Exploration phase (part 2) – Rapid literature reviews

30  
31 Rapid literature reviews were carried out in MEDLINE for published research conducted within  
32  
33 BC and Canada on each of the 10 patient-identified primary care topics. Protocols,  
34  
35 commentaries, and reviews were excluded, but all types of study designs were included. Topic-  
36  
37 specific search strategies using Medical Subject Heading terms and keywords were constructed  
38  
39 for English language publications from 2008-2018. All searches included 'primary health care'  
40  
41 and province or country keywords for the two respective searches. Two reviewers  
42  
43 independently screened abstracts/titles for relevance to the topics, with guidance from the first  
44  
45 and last authors. The total number of BC and Canadian papers included for each topic was  
46  
47 tabulated. A reference library of provincial papers and all citations from the included papers in  
48  
49 the two searches was compiled for use by the Patient Advisory.  
50  
51  
52  
53  
54  
55  
56  
57  
58  
59  
60



## Prioritization phase – Topic importance and horizon scanning surveys

Online surveys were administered province-wide to capture BC patients' and primary care providers' importance ratings of the top 10 topics. Both stakeholder groups were asked to rate each topic individually from 1=*Not at all important* to 5=*Very important*. The topic heading, along with 2-4 bullet points of examples and experiences (from the Patient Advisory) to illustrate the topic, were included to mitigate misunderstanding and misinterpretation of the topic heading. Following the importance ratings, several socio-demographic questions were included in the surveys.

We recruited survey respondents using multiple online dissemination channels, such as social media (Twitter, Facebook), e-newsletters, emails, snowballing and notices posted on several websites. We also included a one-time classified ad in 31 local newspapers in small BC communities and offered telephone completion as an alternative to the online survey. Due to time and budget constraints, the surveys were only provided in English. The sole inclusion criterion was that patients and providers must be living in BC to complete the survey. Analyses will compare importance ratings within and between patients and providers, as well as explore socio-demographic differences in the ratings.

A third survey with BC researchers was included for horizon scanning purposes; namely, to capture any past, ongoing, or upcoming (in the next 12 months) research on the 10 primary care topics. This complements the rapid literature reviews, but enabled us to capture research that has not been published, completed or for which funding has recently been secured. This online survey presented each topic with the same 2-4 bullet point example statements. We

1  
2  
3 collected information on study design and publications, as well as socio-demographics. The  
4  
5 surveys were disseminated through similar online channels to the other surveys.  
6  
7

### 8 9 Integration phase – Dialogue event

10  
11 A final dialogue event is planned for the project, which will bring patients and primary care  
12  
13 providers together to share the survey results, and to engage in a facilitated discussion about  
14  
15 areas of concordance and dissimilarity in the results. Patients will include the Patient Advisory  
16  
17 and others that we will recruit to enhance the representativeness of minority populations (e.g.,  
18  
19 those who are new to the province). We also intend to recruit a diverse mix of primary care  
20  
21 providers, including GPs, nurses, nurse practitioners, and pharmacists.  
22  
23

24  
25 The aim of the event is to gain a better qualitative understanding of the general perspectives of  
26  
27 patients and primary care providers with respect to the quantitative survey results, rather than  
28  
29 to achieve consensus on the top primary care topics for the two stakeholder groups, as in the  
30  
31 Dialogue Model. We have chosen to modify the purpose of the PREFeR dialogue event in this  
32  
33 way because it is more in line with the overall objective of the project; namely, to identify  
34  
35 patient priorities for future primary care research. Comparing patient priorities to those of  
36  
37 providers is an important secondary aim of PREFeR. Nevertheless, we think it is more  
38  
39 imperative to understand where and how these might differ, rather than try to bring the views  
40  
41 of a small subgroup of patients and primary care providers together.  
42  
43

44  
45 In addition to the main patient and provider component, a parallel discussion will be held with  
46  
47 researchers and policymakers at the dialogue event. These stakeholders will also discuss the  
48  
49 survey findings, but the focus will be on how these results might be translated into future  
50  
51  
52  
53  
54  
55  
56  
57  
58  
59  
60

1  
2  
3 research and their policy implications. All groups will come together at the end of the event to  
4  
5 share a summary of their discussions with the entire group of attendees.  
6  
7

## 8 9 RESULTS

### 10 11 Patient Advisory characteristics

12  
13  
14  
15  
16  
17 In total, 11 members (8 female, 3 male) were recruited to the Patient Advisory between March  
18 and May 2017. However, one female patient resigned at the start of the PREFeR Project and did  
19 not provide any input to the project. The remaining 10 Patient Advisory members (7 female, 3  
20 male) were characterized by a mix of socio-demographic characteristics, including ethnic  
21 minority backgrounds, speaking multiple languages, born outside of Canada or the province,  
22 and representation from all five health authorities (Table 1). Nevertheless, the group were  
23 predominantly employed (7/10, 70%), well educated (BSc, BA, teacher's college or higher  
24 university degree: 6/9, 67%), and were considered 'experienced' (e.g., members of one or more  
25 research committees/organizations, patient partners in other studies, research participant  
26 involvement, etc.) in terms of previous research involvement (6/9, 67%).  
27  
28  
29  
30  
31  
32  
33  
34  
35  
36  
37  
38  
39  
40  
41  
42  
43  
44  
45  
46  
47  
48  
49  
50  
51  
52  
53  
54  
55  
56  
57  
58  
59  
60

Table 1. Characteristics of British Columbia Primary Health Care Research Network Patient

Advisory (n=10). All values reported are N(%), unless otherwise specified.

|                                                                                                 | N (%)       |
|-------------------------------------------------------------------------------------------------|-------------|
| Age in years (M, SD) <sup>1</sup>                                                               | 48.4 (13.9) |
| Sex                                                                                             |             |
| Female                                                                                          | 7 (70)      |
| Male                                                                                            | 3 (30)      |
| Ethnicity <sup>1</sup>                                                                          |             |
| White only                                                                                      | 3 (33)      |
| Mixed or any other background                                                                   | 6 (67)      |
| Language(s) spoken <sup>1</sup>                                                                 |             |
| English only                                                                                    | 5 (56)      |
| Multiple languages                                                                              | 4 (44)      |
| Employed                                                                                        |             |
| Yes                                                                                             | 7 (70)      |
| Highest education level <sup>1</sup>                                                            |             |
| Trade or non-University certificate/diploma, community college, University certificate below BA | 3 (33)      |
| BA, teacher's college or higher                                                                 | 6 (67)      |
| Country of birth <sup>1</sup>                                                                   |             |
| Canada                                                                                          | 8 (89)      |
| Years living in BC <sup>1</sup>                                                                 |             |
| 0-5                                                                                             | 2 (22)      |
| 6-15                                                                                            | 1 (11)      |
| More than 15 years                                                                              | 6 (67)      |
| Regional Health Authority                                                                       |             |
| Vancouver Coastal Health                                                                        | 5 (50)      |
| Vancouver Island Health                                                                         | 2 (20)      |
| Fraser Health                                                                                   | 1 (10)      |
| Interior Health                                                                                 | 1 (10)      |
| Northern Health                                                                                 | 1 (10)      |
| Previous research involvement <sup>1</sup>                                                      |             |
| None                                                                                            | 1 (11)      |
| Moderate                                                                                        | 2 (22)      |
| Experienced                                                                                     | 6 (67)      |

<sup>1</sup>Data available for 9 of the 10 Patient Advisory members.

## Brainstorming primary care experiences

Two (1 male, 1 female) Patient Advisory members were unable to attend the primary care experiences teleconference in September 2017, and so their ideas were shared via a telephone call with the first author in advance. In total, these and the remaining eight Patient Advisory members (2 male, 6 female) provided 82 experiences and examples of what stood out for them in primary care in BC (data not shown). There was considerable overlap in these primary care experiences, which were initially grouped into 19 themes (Table 2, column 1). Frequently-mentioned topics across all patients included themes around patient-provider communication, accessibility difficulties, electronic medical records/information sharing, and diversifying care amongst healthcare professionals other than GPs.

Table 2. Researcher-suggested primary care topic headings compared to patient-revised topic headings.

| Researcher-proposed topic headings                      | Patient-revised topic headings                                                                              |
|---------------------------------------------------------|-------------------------------------------------------------------------------------------------------------|
| 1) More patient-centred care needed                     | 1) Care guided by patient needs, values, preferences, and priorities                                        |
| 2) Communication – Informing/empowering patients        | 2) Informing and empowering patients                                                                        |
| 3) Improving patient-provider communication             | 3) Improve and strengthen communication between patients and primary health care providers                  |
| 4) Electronic Medical Records (EMR)/information sharing | 4) Information sharing, including electronic medical records                                                |
| 5) Resources to better manage one's own health          | 5) Resources to better manage one's own health                                                              |
| 6) Prevention/early intervention                        | 6) Prevention/early intervention                                                                            |
| 7) Inability to access regular family doctors (GPs)     | 7) Unable to find a regular family doctor or other primary health care provider                             |
| 8) Inadequacy of walk-in clinics                        | 8) Inadequacy of compensation model where doctors receive a set amount of money per visit (fee-for-service) |

|                                                       |                                                                             |
|-------------------------------------------------------|-----------------------------------------------------------------------------|
| 9) Accessing after-hours care                         | 9) Accessing care where and when patients need it                           |
| 10) Access to specialist knowledge                    | 10) Access to specialist knowledge                                          |
| 11) Impact of a new diagnosis                         | 11) Support for living with chronic conditions                              |
| 12) Care of chronic conditions                        |                                                                             |
| 13) Accessing mental health resources                 | 12) Mental health resources                                                 |
| 14) Challenges in small towns/cities                  | 13) Challenges in small towns/cities and remote areas                       |
| 15) Patient stigma                                    | 14) Addressing stigma and bias                                              |
| 16) Gaps in clinical evidence/information             | 15) Knowledge gaps in clinical evidence and information                     |
| 17) Broaden roles for other health care professionals | 16) New models of primary care that include other health care professionals |
| 18) Inefficient practices put pressure on the system  | 17) Improving continuity and coordination                                   |
| 19) No universal drug plan                            | 18) No universal drug plan                                                  |

## Priority setting workshop

Nine (2 male, 7 female) of the 10 Patient Advisory members attended the in-person priority setting workshop in Vancouver, Canada in September 2017. The researcher-proposed 19 primary care themes were reviewed, discussed, and revised (Table 2, column 2; topic headings and full set of illustrative bullet points are provided in the Supplementary Material). No additional themes were added, but 14 of the topic headings were changed and two of the researcher-suggested topics (*Impact of a new diagnosis, Care of chronic conditions*) were combined to form a single patient-revised topic (*Support for living with chronic conditions*). In total, 18 final topics were retained from the first part of the workshop.

Table 3 shows the reverse-scored rankings of the 18 priorities evaluated by the nine Patient Advisory members attending the workshop. Patients selected and then ranked the 10 most important topics for themselves and in consideration of their social network. The raw rankings in Table 3 are followed by methods of tabulating the final ranked priority topics (via scores and votes), which included the sum of scores across patients, ranked priority via scores, relative importance, ranked priority via relative importance, and the number of votes. The top ranked priority for patient partners was *Care guided by patient needs, values, preferences and priorities*. There were some tied ranks, which were resolved by the number of votes. For example, *Accessing care when and where patients need it* and *Support for living with chronic conditions* were tied for fourth place, but the access-related topic received more votes overall, and so retained the higher priority position.



1  
2  
3  
4  
5  
6  
7  
8  
9  
10  
11  
12  
13  
14  
15  
16  
17  
18  
19  
20  
21  
22  
23  
24  
25  
26  
27  
28  
29  
30  
31  
32  
33  
34  
35  
36  
37  
38  
39  
40  
41  
42  
43  
44  
45  
46  
47

Table 3. Patient-ranked raw scores (n=9) for primary care topics and methods of tabulating final ranked priority topics.

| Topic <sup>1</sup>                 | Ranked scores by patients <sup>2</sup>                        |    |   |   |   |    |    |    |   | Sum of scores | Ranked priority (via scores) | Relative importance (%) <sup>3</sup> | Ranked priority (via %) | Number of votes | Final ranked priority (via scores & votes) |   |
|------------------------------------|---------------------------------------------------------------|----|---|---|---|----|----|----|---|---------------|------------------------------|--------------------------------------|-------------------------|-----------------|--------------------------------------------|---|
|                                    | 1                                                             | 2  | 3 | 4 | 5 | 6  | 7  | 8  | 9 |               |                              |                                      |                         |                 |                                            |   |
|                                    | Care guided by patient needs, values, preferences, priorities | 7  |   | 9 |   | 10 |    | 10 | 8 |               |                              |                                      |                         |                 |                                            | 7 |
| Information sharing, EMR           | 5                                                             | 1  | 8 | 6 | 5 |    | 7  | 6  | 8 | 46            | 2                            | 9.3                                  | 2                       | 8               | 2                                          |   |
| Unable to find a doctor            |                                                               | 10 | 3 |   |   |    | 10 | 4  | 5 | 10            | 42                           | 3                                    | 8.5                     | 3               | 6                                          | 3 |
| Accessing care when, where needed  | 9                                                             | 7  | 4 | 3 | 2 | 8  | 3  |    | 5 | <b>41</b>     | <b>4</b>                     | <b>8.3</b>                           | <b>4</b>                | <b>8</b>        | <b>4</b>                                   |   |
| Support for chronic conditions     |                                                               | 8  | 1 | 8 |   | 6  | 2  | 10 | 6 | <b>41</b>     | <b>4</b>                     | <b>8.3</b>                           | <b>4</b>                | <b>7</b>        | <b>5</b>                                   |   |
| Mental health resources            | 8                                                             | 4  |   | 4 | 8 | 1  |    | 3  | 9 | 37            | 6                            | 7.5                                  | 6                       | 7               | 6                                          |   |
| New models of primary care         | 10                                                            |    | 6 | 2 | 7 | 9  |    |    |   | 34            | 7                            | 6.9                                  | 7                       | 5               | 7                                          |   |
| Improving continuity, coordination |                                                               | 6  | 5 | 9 |   | 7  |    | 2  | 4 | 33            | 8                            | 6.7                                  | 8                       | 6               | 8                                          |   |
| Challenges in small towns/cities   | 2                                                             | 5  | 7 |   |   | 5  |    | 9  | 2 | 30            | 9                            | 6.1                                  | 9                       | 6               | 9                                          |   |

|    |                                     |   |    |    |   |   |   |           |           |            |            |           |           |
|----|-------------------------------------|---|----|----|---|---|---|-----------|-----------|------------|------------|-----------|-----------|
| 1  |                                     |   |    |    |   |   |   |           |           |            |            |           |           |
| 2  |                                     |   |    |    |   |   |   |           |           |            |            |           |           |
| 3  | Improve, strengthen patient-        |   |    |    |   |   |   |           |           |            |            |           |           |
| 4  |                                     |   |    |    |   |   |   |           |           |            |            |           |           |
| 5  | provider communication              | 4 | 2  | 7  | 2 | 8 | 4 | <b>27</b> | <b>10</b> | <b>5.5</b> | <b>10</b>  | <b>6</b>  | <b>10</b> |
| 6  |                                     |   |    |    |   |   |   |           |           |            |            |           |           |
| 7  | Informing, empowering patients      |   |    | 1  | 6 | 4 | 9 | 7         | <b>27</b> | <b>10</b>  | <b>5.5</b> | <b>10</b> | <b>5</b>  |
| 8  |                                     |   |    |    |   |   |   |           |           |            |            |           |           |
| 9  | Prevention/early intervention       | 3 |    |    | 9 |   | 5 |           |           |            |            |           | 3         |
| 10 |                                     |   |    |    |   |   |   |           |           |            |            |           |           |
| 11 | Inadequacy of compensation model    | 3 | 10 |    | 3 |   |   | 1         | 17        |            |            |           | 4         |
| 12 |                                     |   |    |    |   |   |   |           |           |            |            |           |           |
| 13 | No universal drug plan              |   |    | 10 | 4 |   |   | 3         | 17        |            |            |           | 3         |
| 14 |                                     |   |    |    |   |   |   |           |           |            |            |           |           |
| 15 | Resources to better manage health   |   | 9  |    |   |   | 6 |           | 15        |            |            |           | 2         |
| 16 |                                     |   |    |    |   |   |   |           |           |            |            |           |           |
| 17 | Knowledge gaps in clinical evidence | 6 |    |    | 1 |   |   | 1         | 8         |            |            |           | 3         |
| 18 |                                     |   |    |    |   |   |   |           |           |            |            |           |           |
| 19 | Access to specialist knowledge      |   |    | 5  |   |   |   | 1         | 6         |            |            |           | 2         |
| 20 |                                     |   |    |    |   |   |   |           |           |            |            |           |           |
| 21 | Addressing stigma and bias          | 1 | 2  |    |   | 3 |   |           | 6         |            |            |           | 3         |
| 22 |                                     |   |    |    |   |   |   |           |           |            |            |           |           |
| 23 |                                     |   |    |    |   |   |   |           |           |            |            |           |           |
| 24 |                                     |   |    |    |   |   |   |           |           |            |            |           |           |
| 25 |                                     |   |    |    |   |   |   |           |           |            |            |           |           |

EMR = electronic medical record. Bold values indicate topics with ties.

<sup>1</sup> Topic headings have been shortened here for presentation ease. Refer to Table 2, column 2 for full topic headings.

<sup>2</sup> Ranked scores have been reverse scored, where 1=Least important and 10=Most important.

<sup>3</sup> Relative importance = [(topic score) / (maximum points for the group; i.e., number of patients (9) x 55 points) x 100].

## DISCUSSION

Involving patients in setting priorities for primary care research is feasible, fruitful and important to patients, but it is rare. This paper outlines the key activities of the PREFeR Project, which are framed within the Dialogue Model, and reports the processes and results from the initial priority setting exercises. A group of 10 socio-demographically diverse patients from all five regional health authorities in the province were recruited as patient partners to a Patient Advisory group. Using the Nominal Group Technique, over 80 experiences of what stood out for them in primary care were generated. These were first grouped according to common elements and themes into 19 topics by the researchers on the team. After reviewing, discussing and revising the original list, 18 patient-generated topics in lay language were then individually ranked by the Patient Advisory during a one-day priority setting workshop. Based on the pooled results, the top 10 topics were retained. The most highly ranked topics were about patient-centred care, information sharing (including electronic medical records), and finding a regular doctor/primary care provider.

This is the first-known study that has identified generic patient priorities for primary health care in a population not defined by having a specific health condition. The top priorities identified by the Patient Advisory align fairly well with some recent priority setting initiatives in BC. For example, the BC Ministry of Health identified eight service delivery priorities for the province's health system in 2014[22], which were re-confirmed at the primary care level by the BC-PHCRN research, clinical, and policy leads in 2015[23]. The four key primary care priorities from 2015 were 'optimizing community primary health care service delivery' (seven specific areas to

1  
2  
3 optimize are subsumed under this parent topic), 'improving patient experience and cultural  
4  
5 appropriateness across the primary health care system', 'developing an adequate primary care  
6  
7 workforce including determining future demand for a range of providers and optimal roles and  
8  
9 scope, and supporting optimal provider experience,' and 'enhancing optimal access, utilization  
10  
11 and continuity of patient information both across providers within the primary health care  
12  
13 system and with other levels of care across the health system'. Although patients were not  
14  
15 involved in this process, there is overlap between the BC-PHCRN first-listed priority and the  
16  
17 following top topics identified in the current research: 'new models of primary care that include  
18  
19 other health care professionals', 'support for living with chronic conditions', and 'challenges in  
20  
21 small towns/cities and remote areas'. The remaining three BC-PHCRN priorities all aligned to  
22  
23 some degree with other priorities from the Patient Advisory. However, there were four  
24  
25 uniquely-identified Patient Advisory priorities that were not advanced by either the BC Ministry  
26  
27 of Health or BC-PHCRN: 'mental health resources' (albeit, access to specialist treatment, in  
28  
29 general, was mentioned by both organizations, and reducing demand on hospitals by improving  
30  
31 care for those with mental health and substance use issues was one of five strategic priorities  
32  
33 for the BC Ministry of Health in 2017[24]), 'unable to find a regular family doctor/other primary  
34  
35 health care provider', 'improve and strengthen patient-provider communication', and  
36  
37 'information sharing, including electronic medical records'. This highlights the value of including  
38  
39 patients directly in setting priorities for primary care, and is another demonstration of how the  
40  
41 priorities of patients and providers/policymakers/researchers might differ.  
42  
43  
44  
45  
46  
47  
48  
49  
50

51  
52 The Dialogue Model, coupled with the Nominal Group Technique, was a useful framework for  
53  
54 successfully identifying patient priorities for primary health care. This model has been used for  
55  
56  
57  
58  
59  
60

1  
2  
3 agenda setting in many condition-specific populations, such as burns, diabetes, kidney disease,  
4  
5 cystic fibrosis, dementia, bipolar disorder[1], but PREFeR is the first instance of primary care  
6  
7 priority setting with a generic population that we are aware of. To aid future use of the  
8  
9 Dialogue Model in primary care and other priority setting exercises, transparency of the  
10  
11 methods used is essential. To this end, this paper details the initial prioritization activities of  
12  
13 PREFeR, which map on to the Exploration, Consultation and (Interim) Prioritization phases of  
14  
15 the Dialogue Model.  
16  
17  
18  
19  
20

21 The 10 most important topics generated and selected by the Patient Advisory are broad, policy-  
22  
23 level themes, rather than specific research questions. This is directly in line with PREFeR's  
24  
25 original purpose. It is worth highlighting, however, that the Patient Advisory's rank order of  
26  
27 importance of these 10 topics is not the finalized order. We acknowledge that generalizability  
28  
29 of these priorities to the wider patient population might be a potential limitation of these  
30  
31 findings, despite efforts to recruit a diverse Patient Advisory. For this reason, the next activity  
32  
33 was to conduct province-wide online surveys of these top 10 primary care topics – to gather  
34  
35 importance ratings from as many patients as possible – which will then form the final ranking of  
36  
37 the topics. These will also be compared with BC primary care provider ratings of the 10 topics,  
38  
39 to assess the degree of patient-provider alignment. Finally, results from rapid literature reviews  
40  
41 of the 10 topics, along with results from the 'horizon scanning' survey with BC researchers  
42  
43 relating to completed, current or upcoming research on the 10 topics, will provide valuable  
44  
45 information about the nature and extent of research on the topics. The dialogue event between  
46  
47 patients, providers, and researchers/policymakers will provide additional qualitative insights  
48  
49 into the quantitative survey findings.  
50  
51  
52  
53  
54  
55  
56  
57  
58  
59  
60

1  
2  
3 This project demonstrates the feasibility of including patients in priority setting exercises and  
4 offers an approach that is workable within the context of primary care, rather than a condition-  
5 specific population. Several patient-generated topics had not been previously identified by  
6 similar provincial policy and academic efforts, underscoring the importance of including  
7 patients in primary care priority setting. We recommend that future projects consider the topic  
8 importance ratings of patients, patient-provider alignment in these ratings, and under-  
9 researched areas to pursue when deciding which topics to develop into more specific research  
10 questions.  
11  
12  
13  
14  
15  
16  
17  
18  
19  
20  
21  
22  
23

## 24 Acknowledgements

25  
26  
27  
28 We are grateful to the 10 BC-PHCRN Patient Advisory members (Yaron Butterfield, Regina Cid,  
29 Chad Dickie, Penny Henderson, Brenda Jagroop, Ravin Johl, Kent Cadogan Loftsgard, Marilyn  
30 Parker, Hayley Pelletier, and one other who wished to remain anonymous) for volunteering  
31 their time, openly sharing their experiences, and contributing so valuably to PReFeR. We thank  
32 the BC SUPPORT Unit for in-kind support and helping to publicize this study. The Patient Voices  
33 Network assisted with recruiting the Patient Advisory. The BC-PHCRN generously provided  
34 support to PReFeR, both administratively and through engagement with the Patient Advisory.  
35 The Centre for Health Services and Policy Research provided in-kind support through salary for  
36 a project coordinator. Additional co-investigators who contributed to this project: Dr Sabrina T.  
37 Wong, Dr Kim McGrail, Dr Rita McCracken, Dr Vanessa Brcic, and Victoria Schuckel.  
38  
39  
40  
41  
42  
43  
44  
45  
46  
47  
48  
49  
50  
51  
52  
53  
54  
55  
56  
57  
58  
59  
60

## Footnotes

## Author Contributions

LE and MRL designed and led all phases of the project. Specific to the results reported in this paper, LE facilitated the priority setting exercises, thematically grouped the primary care experiences into topics, carried out the priority setting data entry and rankings, and drafted this paper. MRL is the PI for the PREFeR Project, oversaw all phases of the project, and contributed feedback to this paper. MRL and MM recruited the Patient Advisory members. MM led early engagement with the Patient Advisory, oversaw all administrative activities for and helped facilitate the priority setting exercises, and provided feedback on this paper. YB, RJ, KCL, HP are members of the BC Primary Health Care Research Network Patient Advisory and patient partners in PREFeR who provided feedback on this paper, as well as contributing to all aspects of the priority setting exercises reported herein. CMcG provided background information and training on research to the Patient Advisory, provided additional support at the priority setting workshop, and commented on this paper.

## Funding

This work was supported by the Canadian Institutes of Health Research Patient-Oriented Research Collaboration (Grant number 151801).

## Competing interests

None declared.

## Ethical approval

Ethics approval advice was sought and was deemed not required by the Simon Fraser University Research Ethics Board for the phases of the project that are reported in this paper.

## Data sharing

No additional data available.



## References

- 1 Raeymaekers P. Mind the gap! Multi-stakeholder dialogue for priority setting in health research. Brussels: King Baudouin Foundation; 2016:7–42. <https://www.kbs-frb.be/en/Activities/Publications/2016/20160426PP> (accessed 3 Aug 2017).
- 2 Stewart RJ, Caird J, Oliver K, et al. Patients' and clinicians' research priorities: patients' and clinicians' research priorities. *Health Expect*. 2011;14:439–48. doi: 10.1111/j.1369-7625.2010.00648.x
- 3 Tong A, Crowe S, Chando S, et al. Research priorities in CKD: report of a national workshop conducted in Australia. *Am J Kidney Dis*. 2015;66:212–22. doi: 10.1053/j.ajkd.2015.02.341
- 4 Crowe S, Fenton M, Hall M, et al. Patients', clinicians' and the research communities' priorities for treatment research: there is an important mismatch. *Res Involv Engagem*. 2015;1:2. doi: 10.1186/s40900-015-0003-x
- 5 Chalmers I, Bracken MB, Djulbegovic B, et al. How to increase value and reduce waste when research priorities are set. *Lancet*. 2014;383:156–65. doi: 10.1016/S0140-6736(13)62229-1
- 6 Manafò E, Petermann L, Vandall-Walker V, et al. Patient and public engagement in priority setting: a systematic rapid review of the literature. *PLoS ONE*. 2018;13:e0193579. doi: 10.1371/journal.pone.0193579
- 7 Kirwan JR, de Wit M, Frank L, et al. Emerging guidelines for patient engagement in research. *Value Health*. 2017;20:481–6. doi: 10.1016/j.jval.2016.10.003
- 8 NAPCRG's Research Advocacy Committee. Primary care research priorities identified and shared with stakeholders. *Ann Fam Med*. 2014;12:381–2. doi: 10.1370/afm.1678
- 9 Ball L, Barnes K, Leveritt M, et al. Developing research priorities in Australian primary health care: a focus on nutrition and physical activity. *Aust J Prim Health*. 2017;23:554–559. doi: 10.1071/PY16068
- 10 MacFarlane A, Galvin R, O'Sullivan M, et al. Participatory methods for research prioritization in primary care: an analysis of the World Café approach in Ireland and the USA. *Fam Pract*. 2016;34:278–284. doi: 10.1093/fampra/cmz104
- 11 Yoshida S. Approaches, tools and methods used for setting priorities in health research in the 21(st) century. *J Glob Health*. 2016;6:010507. doi: 10.7189/jogh.06.010507
- 12 The James Lind Alliance. The James Lind Alliance Guidebook, Version 7. Southampton: National Institute for Health Research Evaluation, Trials and Studies Coordinating Centre, 2018. <http://www.jla.nihr.ac.uk/jla-guidebook/downloads/Print-JLA-guidebook-version-7-March-2018.pdf> (accessed 16 Jul 2018).
- 13 Broerse JEW, Zweekhorst MBM, van Rensen AJML, et al. Involving burn survivors in agenda setting on burn research: an added value? *Burns*. 2010;36:217–31. doi: 10.1016/j.burns.2009.04.004
- 14 Ryan M, Scott D, Reeves C, et al. Eliciting public preferences for healthcare: a systematic review of techniques. *Health Technol Assess*. 2001;5:1–186.

1  
2  
3 15 Rudan I, Kapiriri L, Tomlinson M, et al. Evidence-based priority setting for health care and research:  
4 tools to support policy in maternal, neonatal, and child health in Africa. *PLoS Med*. 2010;7:e1000308.  
5 doi: 10.1371/journal.pmed.1000308  
6

7 16 Cochrane Priority Setting Methods Group. Plain language summaries of research priority setting  
8 methods. [https://methods.cochrane.org/prioritysetting/plain-language-summaries-research-priority-](https://methods.cochrane.org/prioritysetting/plain-language-summaries-research-priority-setting-methods)  
9 [setting-methods](https://methods.cochrane.org/prioritysetting/plain-language-summaries-research-priority-setting-methods) (accessed 16 Jul 2018).  
10

11 17 Domecq JP, Prutsky G, Elraiyah T, et al. Patient engagement in research: a systematic review. *BMC*  
12 *Health Serv Res*. 2014;14:89. doi: 10.1186/1472-6963-14-89  
13  
14

15 18 Delbecq A, van de Ven A, Gustafson D. Group techniques for program planning, a guide to nominal  
16 group and Delphi processes. Glenview, IL: Scott, Foresman and Company, 1975.  
17

18 19 McMillan SS, King M, Tully MP. How to use the nominal group and Delphi techniques. *Int J Clin*  
19 *Pharm*. 2016;38:655–62. doi: 10.1007/s11096-016-0257-x  
20

21 20 Sink DS. Using the nominal group technique effectively. *Natl Product Rev*. 1983;2:173–84. doi:  
22 10.1002/npr.4040020209  
23

24 21 Gastelurrutia MA, Benrimoj SIC, Castrillon CC, et al. Facilitators for practice change in Spanish  
25 community pharmacy. *Pharm World Sci*. 2009;31:32–9. doi: 10.1007/s11096-008-9261-0  
26  
27

28 22 British Columbia Ministry of Health. Setting priorities for the B.C. health system. 2014.  
29 <http://www.health.gov.bc.ca/library/publications/year/2014/Setting-priorities-BC-Health-Feb14.pdf>  
30 (accessed 16 Jul 2018).  
31

32 23 BC Primary Health Care Research Network. Research priorities. [https://spor-](https://spor-bcphcrn.ca/about/research-priorities/)  
33 [bcphcrn.ca/about/research-priorities/](https://spor-bcphcrn.ca/about/research-priorities/) (accessed 16 Jul 2018).  
34

35 24 British Columbia Ministry of Health. Ministry of Health Patients as Partners 2017 provincial dialogue  
36 report. 2017. [https://www2.gov.bc.ca/assets/gov/health/about-bc-s-health-care-system/heath-care-](https://www2.gov.bc.ca/assets/gov/health/about-bc-s-health-care-system/heath-care-partners/patients-as-partners/provincial-annual-dialogue-report-2017.pdf)  
37 [partners/patients-as-partners/provincial-annual-dialogue-report-2017.pdf](https://www2.gov.bc.ca/assets/gov/health/about-bc-s-health-care-system/heath-care-partners/patients-as-partners/provincial-annual-dialogue-report-2017.pdf) (accessed 16 Jul 2018).  
38  
39  
40  
41  
42  
43  
44  
45  
46  
47  
48  
49  
50  
51  
52  
53  
54  
55  
56  
57  
58  
59  
60

1  
2  
3  
4  
5  
6  
7  
8  
9  
10  
11  
12  
13  
14  
15  
16  
17  
18  
19  
20  
21  
22  
23  
24  
25  
26  
27  
28  
29  
30  
31  
32  
33  
34  
35  
36  
37  
38  
39  
40  
41  
42  
43  
44  
45  
46  
47  
48  
49  
50  
51  
52  
53  
54  
55  
56  
57  
58  
59  
60

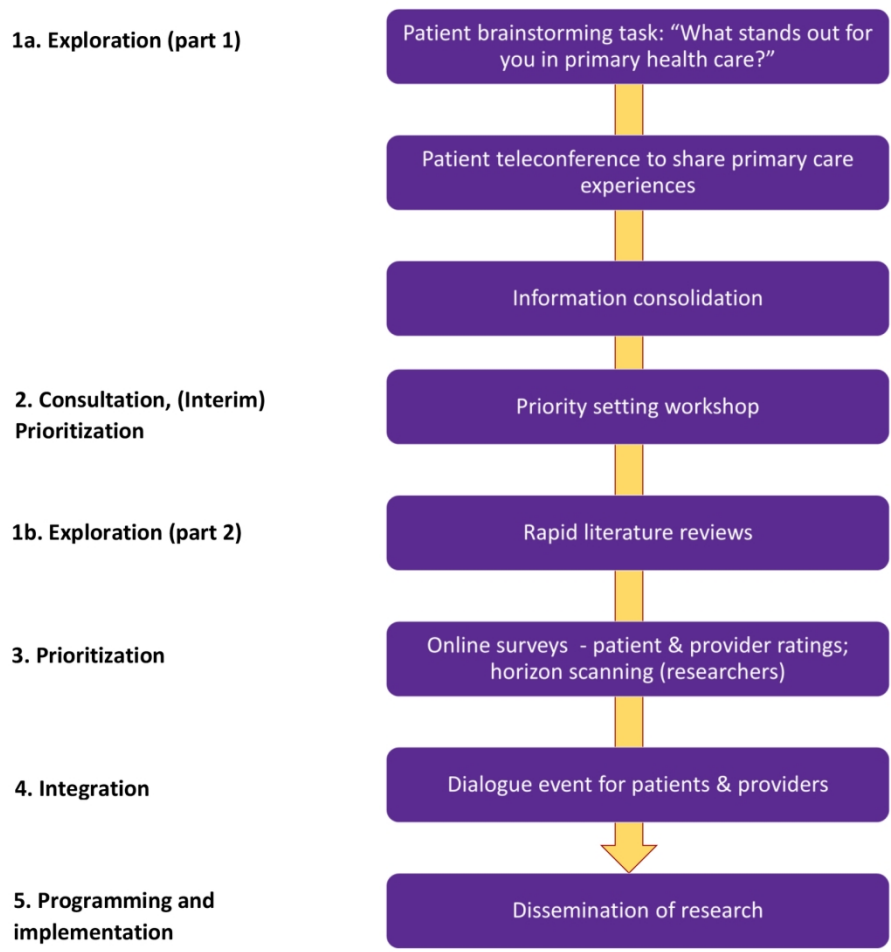

Figure 1. Key activities of the PREFeR Project, framed within the five phases of a modified Dialogue Model

Key activities of the PREFeR Project, framed within the five phases of a modified Dialogue Model

173x196mm (300 x 300 DPI)

## Patient-revised topics and full list of bullet point examples and experiences from the priority setting workshop

### 1) Care guided by patient needs, values, preferences, and priorities

- “Block and tackle” approach to protecting territory (i.e., using defensive/offensive tactics), rather than patient-centred care
- Care needs to keep pace with patients expectations for information, especially in the context of widespread access to online information
- Need to embark on a journey of discovery with the patient
- Role of primary care provider is to be a coordinator of care in a team-based setting
- More holistic approach needed, where the whole body is treated, not just whatever particular part/system is ‘ill’
- Consideration of non-pharmacological options for treatment

### 2) Informing and empowering patients

- Information not explained to patient adequately
- Not all treatment options explained/offered, especially around alternative medicine
- Advice needs to be targeted in a way that patients know how to take action (don’t just give diagnosis)
- Information not clearly communicated to patients about how/why something being prescribed
- Treatment recommendations need to be appropriate for/tailored to the needs of the community (including low-income)
- Resources patients are directed to need to be appropriate and available based on needs of the community (including low-income)
- Guidance on red flags and when to seek care
- Strategies to address/accept ‘new normal’ after a new diagnosis
- Shock of new diagnosis may impair understanding/ability to ask questions during initial consultation
- Understanding individual patient priorities for their care and targeting care appropriately

### 3) Improve and strengthen communication between patients and primary health care providers

- Patients may not describe underlying issue/relevant symptoms, but questioning could identify it
- Patients may not have time/ability to process information to ask all questions during a consultation
- Enhancing decision-making shared between patients and providers

- Addressing language barriers in care
- Use recap strategy to check understanding

#### 4) Information sharing, including electronic medical records

- Lack of coordinated information sharing between health care professionals (especially health authorities) means re-telling ‘story’ repeatedly & treatments/information given may never be known between health professionals and across settings including walk-in clinics, home-care, hospital
- Patients unable to access own EMR including clinical notes
- EMR often not reviewed before patient appointment, which leads to gaps in care
- Pharmanet works well in transferring prescription information between health authorities, but medical records don’t similarly transfer
- Patient should not need to manage all of the communication within a care team
- Streamlined processes for patient-led consent and information sharing

#### 5) Resources to better manage one’s own health

- No access to EMR including clinical notes
- Should be ability to access information without seeing PHC physician (e.g., patient portal, patient-led chronic disease programming)
- No resources to help understand what patients can do to manage their own health (knowing schedule for check-ups, screening etc.)
- Lack of patient knowledge of clinical guidelines
- Patients need help interpreting what is and what isn’t evidence-based
- Clarity needed around what to do when new to the province
- Need for centralized repositories with quality resources and programs available, including support groups

#### 6) Prevention/early intervention

- Preventative medicine and lifestyle management not prioritized
- When, why and which health care professionals should do screening
- Lack of early interventions leads to poorer outcomes and higher cost down the road
- Roles for other professionals in preventative health care and lifestyle management

#### 7) Unable to find a regular family doctor or other primary health care provider

- Weighing up convenience of walk-in over desire to see GP
- Places pressure on the emergency department
- Patients feel like a “product of the system”
- Hard to navigate healthcare system
- Receptionists act as gatekeepers (but without providing enough information)
- More students need to go into family practice

- Environmental/natural disasters impact patient health, which puts even further pressure on the system

#### 8) Inadequacy of compensation model where doctors receive a set amount of money per visit (fee-for-service)

- Often not possible to discuss multiple, interrelated issues (chronic conditions)
- Encourages walk-in clinic practice which does not meet patient needs
- Walk-in clinics –line ups for appointments are for long periods (not suitable for some patients/weather) & waiting space isn't adequate
- Need research to understand how to most effectively compensate physician

#### 9) Accessing care where and when patients need it

- Few options for after-hours care
- Need for care in home and long-term care
- Suitability of waiting space and physical design of clinics

#### 10) Access to specialist knowledge

- Need for rapid access to specialist care for specific questions
- Processes to get specialist information that reduce need for face-to-face access to a specialist
- Need to keep patient in-the-loop on communication between primary care and specialists
- Direct access to specialists to answer a question

#### 11) Support for living with chronic conditions

- No support for management of a chronic disease without a family doctor
- Family GPs refusing to accept patients with 'complex' conditions & ethics/implications of this
- Difficult to get repeat prescriptions filled without family GP
- Limited time with physician and nurse, especially with chronic conditions
- GPs could notify patients of support programs to help cope, including peer-to-peer support
- Some conditions cause cognitive difficulties (e.g., memory problems, difficulty processing or not correctly interpreting information)
- After a course of treatment, patient left somewhat alone dealing with side effects & feeling of being on own
- Can be long intervals between appointments & patient can 'feel lost' in this time interval
- Patient and doctor misconceptions likely with understanding condition/treatments
- Differentiation between chronic conditions and acquired conditions and recognition that there isn't always a causal relationship between them

- Continuity of care is essential in the context of chronic disease
- Clear communication of prognosis and pathway of care going forward, including the spectrum of possibilities

### 12) Mental health resources

- Often limited or no availability of resources for mental health and substance use needs
- Gap between primary care and specialists services, particularly in the absence of a diagnosis
- Information needed on how to access mental health and substance use resources
- Primary care physicians (and Emergency doctors) not qualified to manage complex mental health needs, so patients access acute care more often
- Co-existence of mental health and physical conditions poorly managed

### 13) Challenges in small towns/cities and remote areas

- Primary care doctors need to do more, since there are fewer specialists in small towns/cities
- Transportation needs must be considered
- Improved access to specialists also needed
- Less access to diagnostic testing
- Less choice/availability for doctors/treatments, which has larger impact on 'complex' conditions
- Privacy/stigma issues in rural areas (e.g., prescription pick-up)

### 14) Addressing stigma and bias

- Cultural safety and competency
- Community sensitivities
- Care for LGBTQ communities
- Stigma particular to transgender community
- Assumptions made based on health condition/background/socioeconomic status
- Effects of terminology, diagnoses, etc.
- Impact of stigma and bias on patient outcomes

### 15) Knowledge gaps in clinical evidence and information

- Issues of consistency across doctors when seeing multiple providers and levels of expertise (of GPs)
- GPs appear uncertain of correct course of care, or reluctant to perform procedures (provide clinical 'judgement')
- Knowledge and application of clinical guidelines
- Continuing education for practicing professionals
- Need to study who responds, not just the treatments themselves

- Treatment recommendations need to be appropriate for/tailored to the needs of the community (including low-income)
- Speed of implementation of scientific research (17 years) needs to be improved
- Patients want new treatments now, even though full evidence base may not be there
- Patients aware of differences in treatments between provinces and countries and want access to full set of options
- Scientific/research models only useful insofar as they predict outcomes in the real world
  - Magnitude of effect needs to be considered

#### 16) New models of primary care including other health care professionals

- Need for better collaboration and cooperation among health care professionals and health disciplines
- Expanded roles for other health care professionals
- Better support needed for caregivers and home support workers, including respite care

#### 17) Improving continuity and coordination

- Care outside of office (long-term care, home care) and outside of office hours is needed to ensure continuity
- Reluctance to renew prescriptions for more than three months
- Unnecessary appointments required to access services (e.g. vaccinations, physiotherapists)
- New questions occur to patients after an appointment, but no one to ask/have to make a new appointment to have these questions answered
- Emergency respondents appear well-trained, but often involves 4-6 health professionals
- Patients discharged from secondary care without ensuring adequate services in place (transportation, clean/safe home, family pressure/stress)

#### 18) No universal drug plan

- Patients' limitations, needs & affordability/financial issues must be taken into account
  - Some 'over-the-counter' products are cheaper
  - Patients may skip/halve medications (appear non-adherent, but can't afford 'as prescribed')
  - Lack of coverage for prescription drugs puts pressure on the system elsewhere
- Difficulties with pharmacies inputting out-of-province information (when new to BC)
- Education for primary care providers on cost of prescription drugs to guide prescribing decisions



# BMJ Open

## What matters most to patients about primary health care: Mixed methods patient priority setting exercises within the PREFeR (PRioritiEs For Research) Project

|                                 |                                                                                                                                                                                                                                                                                                                                                                                                                                                                                                                                                                                                |
|---------------------------------|------------------------------------------------------------------------------------------------------------------------------------------------------------------------------------------------------------------------------------------------------------------------------------------------------------------------------------------------------------------------------------------------------------------------------------------------------------------------------------------------------------------------------------------------------------------------------------------------|
| Journal:                        | <i>BMJ Open</i>                                                                                                                                                                                                                                                                                                                                                                                                                                                                                                                                                                                |
| Manuscript ID                   | bmjopen-2018-025954.R1                                                                                                                                                                                                                                                                                                                                                                                                                                                                                                                                                                         |
| Article Type:                   | Research                                                                                                                                                                                                                                                                                                                                                                                                                                                                                                                                                                                       |
| Date Submitted by the Author:   | 24-Jan-2019                                                                                                                                                                                                                                                                                                                                                                                                                                                                                                                                                                                    |
| Complete List of Authors:       | Edwards, Louisa; Simon Fraser University, Faculty of Health Sciences; Centre for Clinical Epidemiology and Evaluation<br>Monro, Melody; Fraser Health Authority<br>Butterfield, Yaron; BC Primary Health Care Research Network Patient Advisory<br>Johl, Ravin; BC Primary Health Care Research Network Patient Advisory<br>Loftsgard, Kent; BC Primary Health Care Research Network Patient Advisory<br>Pelletier, Hayley; BC Primary Health Care Research Network Patient Advisory<br>McGavin, Colleen; BC SUPPORT Unit<br>Lavergne, M.; Simon Fraser University, Faculty of Health Sciences |
| <b>Primary Subject Heading</b>: | General practice / Family practice                                                                                                                                                                                                                                                                                                                                                                                                                                                                                                                                                             |
| Secondary Subject Heading:      | Research methods                                                                                                                                                                                                                                                                                                                                                                                                                                                                                                                                                                               |
| Keywords:                       | patient engagement, priority setting, primary health care, Dialogue Model                                                                                                                                                                                                                                                                                                                                                                                                                                                                                                                      |
|                                 |                                                                                                                                                                                                                                                                                                                                                                                                                                                                                                                                                                                                |

SCHOLARONE™  
Manuscripts

1  
2  
3  
4  
5  
6  
7  
8  
9  
10  
11  
12  
13  
14  
15  
16  
17  
18  
19  
20  
21  
22  
23  
24  
25  
26  
27  
28  
29  
30  
31  
32  
33  
34  
35

# What matters most to patients about primary health care: Mixed methods patient priority setting exercises within the PREFeR (PRioritiEs For Research) Project

Louisa Edwards<sup>1,2</sup>, Melody Monro<sup>3</sup>, Yaron Butterfield<sup>4</sup>, Ravin Johl<sup>4</sup>, Kent Cadogan Loftsgard<sup>4</sup>,  
Hayley Pelletier<sup>4</sup>, Colleen McGavin<sup>5</sup>, M. Ruth Lavergne<sup>1</sup>

36  
37  
38  
39  
40  
41  
42  
43  
44  
45  
46  
47  
48  
49  
50  
51  
52  
53  
54  
55  
56  
57  
58  
59  
60

**Corresponding author:**

M. Ruth Lavergne

Simon Fraser University

Faculty of Health Sciences

8888 University Drive

Blusson Hall, Room 10502

Burnaby, BC

V5A 1S6

Phone: +1-778-782-3937 | Email: [ruth\\_lavergne@sfu.ca](mailto:ruth_lavergne@sfu.ca)

1  
2  
3 **Author affiliations:**  
4  
5

6 <sup>1</sup> Faculty of Health Sciences, Simon Fraser University, Burnaby, Canada  
7

8  
9 <sup>2</sup> Centre for Clinical Epidemiology and Evaluation, Vancouver Coastal Health Research Institute,  
10  
11 Vancouver, British Columbia, Canada  
12  
13

14  
15 <sup>3</sup> Fraser Health Authority, Surrey, Canada  
16

17  
18 <sup>4</sup> BC Primary Health Care Research Network Patient Advisory, Vancouver, Canada  
19  
20

21 <sup>5</sup> BC SUPPORT Unit, Vancouver, Canada  
22  
23  
24  
25  
26

27 **Word count: 5245**  
28  
29  
30  
31  
32  
33  
34  
35  
36  
37  
38  
39  
40  
41  
42  
43  
44  
45  
46  
47  
48  
49  
50  
51  
52  
53  
54  
55  
56  
57  
58  
59  
60

## Abstract

**Objectives:** To identify patient-generated priority topics for future primary care research in British Columbia (BC), Canada within a diverse patient population.

**Design:** Mixed methods priority setting exercises framed by the Dialogue Model, using the Nominal Group Technique (rank-ordered scoring), and province-wide online surveys capturing importance ratings of the top 10 primary health care topics from patients and primary care providers.

**Setting:** BC, Canada

**Participants:** Topic identification was completed by 10 patient partners (7 female, 3 male) from the BC Primary Health Care Research Network Patient Advisory; online surveys were completed by 464 patients and 173 primary care providers.

1  
2  
3  
4 **Results:** The 10 members recruited to the Patient Advisory provided over 80 experiences of  
5  
6  
7 what stood out for them in BC primary care, which were grouped thematically into 18 topics, 10  
8  
9 of which were retained in province-wide surveys. Top-rated survey topics for both patients  
10  
11 (n=464) and providers (n=173) included being unable to find a regular family doctor/other  
12  
13 primary health care provider, support for living with chronic conditions, mental health  
14  
15 resources, and information sharing, including electronic medical records. However, all 10 topics  
16  
17 were rated highly by both groups (patients: mean range=4.09-4.64, SDs=0.75-1.02; providers:  
18  
19 mean range=3.95-4.59, SDs=0.76-1.07).  
20  
21  
22

23  
24 **Conclusions:** The current project activities demonstrate the feasibility of including patients in  
25  
26  
27 priority setting exercises for primary health care in general, rather than focusing on a condition-  
28  
29 specific population or disease area. There was considerable overlap between patient-generated  
30  
31 topics and topics previously identified by other stakeholders, but patients identified two  
32  
33 additional topics (Mental health resources, Improve and strengthen patient-provider  
34  
35 communication). More similarities than differences in topic importance between patients and  
36  
37 providers emerged in the online surveys. The project activities that follow (rapid literature  
38  
39 reviews, multi-stakeholder dialogue) will highlight under-researched topics and inform the  
40  
41 development of specific research questions.  
42  
43  
44  
45  
46  
47  
48  
49

50 **Keywords:** patient engagement, priority setting, primary health care, Dialogue Model  
51  
52  
53  
54  
55  
56  
57  
58  
59  
60

## ARTICLE SUMMARY

### Strengths and limitations of this study

- This is the only published patient priority setting project that we are aware of that addresses primary health care topics in general, rather than focusing on a particular health condition or issue.
- The project was informed by the Dialogue Model, which is a multi-stage, multi-stakeholder structured priority setting framework, but explicitly focused on patient perspectives within the Exploration and Consultation Phases of primary health care topic generation.
- Patients identified new topics and added depth to topics previously identified in similar exercises among policymakers or researchers, further highlighting the importance of patient engagement in priority setting.
- Generalizability of the current priority topics might be limited, given the characteristics of the Patient Advisory and survey respondents.

## INTRODUCTION

Primary care is the first point of contact with health care for most patients, and supports a wide variety of health needs. It is not surprising, therefore, that a host of primary care research focuses on studying patient needs and gaps in care. However, patients are not frequently included in prioritizing research ideas[1–3]. At a basic level, this is problematic because patient, clinician, and researcher priorities may differ significantly[4]. At an applied level, intervention uptake and, consequently, any impact on health outcomes may suffer if the problems studied and outcomes suggested have not considered patients' perspectives, leading to research 'waste'[5]. Patient prioritization of topics for research ultimately benefits the intended end-users of primary health care directly – patients themselves – and makes better use of scarce resources.

There is growing recognition of the importance of involving patients in research priority setting. In response, there has been a proliferation of patient priority setting studies in recent years, with 70 articles from the UK, US, Canada, the Netherlands and Australia identified between 2007-2017 in a rapid systematic review of public and patient engagement in prioritization[6]. Yet, most processes for engaging patients in research have focused on populations defined by a specific condition[6,7], rather than primary care more generally. While there have been exercises to identify primary care research priorities at clinical and academic conferences[8], these did not include patients. We have only identified two recent publications that examined primary care priorities more generally – i.e., in which the overall focus was not specific to a particular health condition – and that involved patients as one of the multi-stakeholder

1  
2  
3 groups[9–11]. Even so, these studies actually targeted more specific topics – how to promote  
4  
5 healthy behaviours through primary care, and ensuring care is guided by patient goals and  
6  
7 preferences – rather than allowing any topics relating to primary care experiences to emerge as  
8  
9 priorities. In order to examine gaps in care that affect a large and diverse range of patients, it is  
10  
11 important to enable patients to voice whatever primary health care priorities are most pressing  
12  
13 for them.  
14  
15

16  
17  
18 There are a host of tools and techniques for priority setting. One recent methodological review  
19  
20 found roughly equal numbers of studies that used published, structured frameworks and those  
21  
22 that used newly-developed tools (e.g., surveys specific to the project)[12]. In terms of  
23  
24 structured approaches, there are several multi-stage priority setting frameworks, such as the  
25  
26 James Lind Alliance Priority Setting Partnerships[13] and the Dialogue Model[1,14]. The James  
27  
28 Lind Alliance has developed important principles to guide priority setting for research with  
29  
30 patients and caregivers [15], but this approach is anchored on treatment uncertainties and does  
31  
32 not translate directly to questions related to primary care more generally. There does not  
33  
34 appear to be a single, best method[16], nor is there clear agreement on whether using a  
35  
36 combination of tools for priority setting is superior to using one technique alone[12]. However,  
37  
38 use of a clearly defined approach is recommended[12,17], and the choice of which method(s)  
39  
40 may be best guided by the research question[16]. The Cochrane Priority Setting Methods Group  
41  
42 noted that researchers may adapt and implement the same methods in different ways  
43  
44 depending on the context and research focus[18].  
45  
46  
47  
48  
49  
50  
51

52  
53 Recognizing that patient engagement early in the research process is important, but has been  
54  
55 largely absent from priority setting exercises in primary care, the main aim of the PREFeR  
56  
57  
58



1  
2  
3 (PRioritiEs For Research) Project was to identify patient-generated priorities for primary care  
4  
5  
6 research in British Columbia (BC), Canada. This is consistent with Canada's Strategy for Patient  
7  
8 Oriented Research, which supports research that engages patients as partners, focuses on  
9  
10 patient-identified priorities and improves patient outcomes[19]. This decision was also shaped  
11  
12 by the fact that research priorities for primary care had recently been identified in BC, but this  
13  
14 process included policymakers, clinicians, and researchers, and not patients[20]. By focusing on  
15  
16 topics that are of importance to patients, research is more likely to have positive impacts on  
17  
18 policy and practice.  
19  
20  
21

22  
23 As noted in reviews[6,21], detail about methodology is often lacking in articles about priority  
24  
25 setting, and this is essential to replicating approaches and understanding how and what works  
26  
27 for patient engagement. The PREFeR Project was informed by the Dialogue Model, which is a  
28  
29 multi-stage priority setting framework involving multiple stakeholders, but modified this model  
30  
31 to focus solely on patient perspectives for initial topic generation[1]. Here we report the  
32  
33 resulting patient-identified priorities and their importance for patients and primary care  
34  
35 providers. We also overview the other project activities that are couched within the later  
36  
37 phases of the Dialogue Model, which correspond to the secondary aims of PREFeR: to assess  
38  
39 whether research is already being conducted on the patient priorities through rapid literature  
40  
41 reviews and 'horizon scanning' surveys with BC researchers, and to explore where and why  
42  
43 differences might occur in the survey results through a facilitated discussion ('dialogue') with  
44  
45 patients, providers, researchers and policymakers. Taken together, results from these activities  
46  
47  
48  
49  
50  
51  
52  
53 are key considerations for setting future research questions.  
54  
55  
56  
57  
58  
59  
60

## METHODS

### Patient and public involvement

The BC Primary Health Care Research Network (BC-PHCRN) Patient Advisory (hereafter, referred to as the Patient Advisory) was formed to conduct this priority setting exercise, as well as gather their input into multiple studies supported by the BC-PHCRN. Patients living throughout BC were recruited to the Patient Advisory through expression of interest calls posted by the BC-PHCRN, through Patient Voices Network (a network of patients and caregivers interested in engagement opportunities with health care partners in British Columbia), and through a patient engagement workshop at the Centre for Health Services and Policy Research annual conference (Vancouver, BC, March 2017). We included the following text in the invitation: "Priority will be given to ensuring that patient partners are inclusive of the diverse communities and individuals who access primary health care services. Please let us know if and how your participation might add to diversity". We used this information to purposively recruit patients, aiming to maximize diversity with respect to health care needs, health authority, ethnicity (including First Nations), age, and gender. We also sought to include both patients with and without previous research experience. As is consistent with Canada's Strategy for Patient Oriented Research[19], the Patient Advisory members were research partners in PReFeR. They contributed to planning and shaping research activities other than priority setting, since they provided input as participants to the priority setting phase of this project, as described below.

## Overview of the Dialogue Model

Compared to the other structured priority setting frameworks, the five phases of the Dialogue Model – Exploration, Consultation, Prioritization, Integration, and Programming and Integration[1,14] – mapped most closely on to the overarching ethos of PREFeR (Figure 1). In particular, the Dialogue Model is based on participatory and interactive approaches, which advocate an equal partnership between patients and other stakeholders[1]. Through processes that encourage mutual learning, the Dialogue Model can lead to co-ownership of the priorities identified[1]. The model uses a variety of mixed methods (e.g., literature reviews, interviews, surveys) throughout the five phases, which we also identified as essential to the aims of PREFeR. Commonly, these methods are grounded in other structured techniques. For example, focus groups may be framed within the Nominal Group Technique (NGT)[22], which is a widely-used method of idea generation, based on four key stages: individual and silent idea generation in response to the nominal question, round-robin feedback to the group (i.e., each person sequentially shares one idea at a time), group discussion and clarification of ideas, individual voting (ranking or rating of ideas)[23].

The five phases of the Dialogue Model were modified to match the aims of PREFeR. Most notably, we chiefly focused on patient views in the Consultation phase, since the goal of PREFeR was to generate patient priorities. However, priorities from our other stakeholders were gathered and compared to patient priorities later in the project. Below, we overview all activities in PREFeR as they map on to the phases of the Dialogue Model, but the primary focus of this paper is on the Exploration, Consultation, and Prioritization phases. Research activities in

1  
2  
3 these phases correspond to use of NGT to generate and prioritize patient-generated primary  
4 care topics, and province-wide online surveys to rate the importance of the top 10 patient-  
5 ranked topics amongst a wider group of patients and primary care providers.  
6  
7  
8  
9

## 10 11 **Data collection**

### 12 13 14 15 **Exploration phase (part 1)**

#### 16 17 18 19 *Brainstorming primary care experiences*

20  
21 In the first activity of the project (within the Exploration phase), the ten-member Patient  
22 Advisory was sent an email request to brainstorm their ideas in response to the following  
23 question, “Based on your experiences of primary care, what things really stand out for you?”  
24  
25 Primary care was defined as where most people go first for medical help and advice when they  
26 have a health problem, and provided by health care professionals, like family doctors, nurses or  
27 nurse practitioners, pharmacists or emergency services staff. The question was neutrally  
28 framed by design, such that either positive or negative experiences of primary care might  
29 emerge. Patient Advisory members were asked to spend about 10 minutes on the task and  
30 write down as many things that came to mind in response to this question. They were invited to  
31 a teleconference to share their ideas with the group approximately two weeks later. For those  
32 unable to attend, an opportunity to provide their thoughts through individual telephone calls  
33 with the first author prior to the scheduled teleconference was offered. With permission, these  
34 members’ primary care experiences were shared with the rest of the Patient Advisory during  
35 the group teleconference.  
36  
37  
38  
39  
40  
41  
42  
43  
44  
45  
46  
47  
48  
49  
50  
51  
52  
53  
54  
55  
56  
57  
58  
59  
60

1  
2  
3 The teleconference was led by the first author and facilitated by the second author. The first  
4  
5 author has a PhD in psychology and over eight years' experience working within large, multi-  
6  
7 stakeholder primary care research teams that all included patient and public involvement  
8  
9 members. She joined the research team after the Patient Advisory had been recruited, did not  
10  
11 know any of the members prior to working on the project, and the teleconference was her first  
12  
13 interaction with the Patient Advisory. The first and second author worked together to ensure  
14  
15 equal opportunity of patient voices throughout the teleconference.  
16  
17  
18  
19  
20

21 Using the Nominal Group Technique[22] implemented with a teleconference platform[24], each  
22  
23 Patient Advisory member was asked to provide one idea at a time, in round-robin fashion, until  
24  
25 there were no more new ideas to share. In line with NGT, patients were asked to first briefly  
26  
27 describe the ideas that they had in response to the question, "what things really stand out for  
28  
29 you in primary care?". Further explanation and discussion by the entire group followed after all  
30  
31 ideas had been listed. The principal investigator (RL) took detailed notes throughout the  
32  
33 teleconference, which were emailed to the Patient Advisory the following day for their review.  
34  
35  
36  
37  
38 No identifiers were used in the notes, since the aim was to record the raw list of ideas from the  
39  
40 entire group.  
41  
42  
43

44 Based on the teleconference notes, the first author consolidated the raw list of brainstormed  
45  
46 ideas. Common elements were grouped thematically into topics. A heading for each topic was  
47  
48 constructed with a short phrase in lay language to reflect the underlying theme of the collection  
49  
50 of examples and experiences raised by the patients. The specific patient examples and  
51  
52 experiences were additionally provided in bullet form below each topic heading. After an initial  
53  
54 discussion with the second and last author, the topic list was refined and then emailed to the  
55  
56  
57  
58  
59  
60

1  
2  
3 Patient Advisory. The Patient Advisory was asked to review the list of topics ahead of an in-  
4  
5 person priority setting workshop, to ensure it reflected the teleconference discussion  
6  
7 accurately.  
8  
9

## 10 11 Consultation and (Interim) Prioritization phases 12

### 13 14 15 *Interim priority setting workshop* 16

17 Three and a half weeks after the teleconference, a full-day, in-person priority setting workshop  
18  
19 with the Patient Advisory was held in Vancouver, BC. The purpose of the workshop was, firstly,  
20  
21 to review, discuss, revise, and agree on the list of the patient-generated primary care topics  
22  
23 that emerged out of the teleconference (Consultation phase), and then to have the patients  
24  
25 individually rank the top 10 most important topics ((Interim) Prioritization phase). Similar to the  
26  
27 methods used by Broerse and colleagues [13], we decided in advance that 10 topics would be a  
28  
29 manageable number to carry forward for patients and primary care providers to rate in an  
30  
31 online survey. Collectively, this constituted the remaining steps of the NGT process, which  
32  
33 followed from the initial stages conducted during the teleconference.  
34  
35  
36  
37  
38  
39

40 To arrive at a final, agreed upon list of primary care topics, the Patient Advisory was asked to  
41  
42 review the topics and consider: (1) the suitability of the topic label wording, (2) whether any  
43  
44 topics were missed from the teleconference or new ideas had emerged since that discussion,  
45  
46 and (3) whether any additional topics should be separated out from the patient examples  
47  
48 and/or whether two or more topics could be grouped together. These points were discussed for  
49  
50 each topic in turn, making revisions on a projected screen in real time during the workshop.  
51  
52  
53  
54  
55  
56  
57  
58  
59  
60

1  
2  
3 Once the list of primary care topics was finalized, the group moved on to the second task of the  
4 workshop – ranking the topics in terms of their importance. The final topic list was distributed  
5  
6 to the Patient Advisory, who were then asked to privately choose the 10 topics that were most  
7  
8 important to them personally. Personal importance could also include thinking about how the  
9  
10 issues might affect other people they were close to (e.g., family, friends). A recording sheet was  
11  
12 provided for patients to arrange their top 10 topics in terms of 1=*Most important* to 10=*Least*  
13  
14 *important*. Ties were not permitted. In line with NGT methods, patients were asked to  
15  
16 complete this task silently and on their own, and they were given as much time as needed. The  
17  
18 first author checked the ranking sheets for completeness as they were collected.  
19  
20  
21  
22  
23  
24  
25

26 The first author entered the patient-ranked data into an Excel spreadsheet, and then reverse  
27  
28 scored the data, such that 10=*Most important* and 1=*Least important*. Following the steps  
29  
30 outlined in McMillan et al.[23], results were pooled by first creating a sum of scores for each  
31  
32 topic, which indicated its ranked priority or strength of vote score[25], and then calculating the  
33  
34 proportion (%) of scores ranked within the top 10 topics, which indicated relative importance  
35  
36 [26]. In order to resolve ties, a third method of tabulating the ranks involved counting the  
37  
38 number of times each topic was ranked within the top 10 across patients, which is an indication  
39  
40 of topic popularity[23,25]. The data were then sorted according to their ranked priority, yielding  
41  
42 the top 10 topics that the project would carry forward in the remaining project activities.  
43  
44  
45  
46  
47  
48

### 49 *Exploration phase (part 2) - Rapid literature reviews*

50  
51 Rapid literature reviews were carried out in MEDLINE for published research conducted within  
52  
53 BC and Canada on each of the 10 patient-identified primary care topics. Topic-specific search  
54  
55 strategies using Medical Subject Heading terms and keywords were constructed for English  
56  
57  
58  
59  
60

1  
2  
3 language publications from 2008-2018. Two reviewers independently screened abstracts/titles  
4  
5 for relevance to the topics, with guidance from the first and last authors. The total number of  
6  
7 BC and Canadian papers included for each topic was tabulated. This information was used to  
8  
9 inform the Integration phase and future development of research questions, but we do not  
10  
11 report results herein. This reflects a divergence from the Dialogue Model, in which we carried  
12  
13 out rapid literature reviews after the Consultation phase, instead of within the Exploration  
14  
15 phase.  
16  
17  
18  
19  
20

## 21 Prioritization phase

### 22 *Topic importance surveys*

23  
24  
25 Online surveys were administered province-wide to capture BC patients' and primary care  
26  
27 providers' importance ratings of the top 10 topics. Both stakeholder groups were asked to rate  
28  
29 each topic individually from 1=*Not at all important* to 5=*Very important*. The topic heading,  
30  
31 along with 2-4 bullet points of examples and experiences (from the Patient Advisory) to  
32  
33 illustrate the topic, were included to mitigate misunderstanding and misinterpretation of the  
34  
35 topic heading. Participants were asked to *rate* rather than *rank* the identified topics, so that we  
36  
37 could understand which topics were closely clustered with respect to importance, and not just  
38  
39 overall rank order. A freetext box was provided for any comments respondents wished to  
40  
41 submit. Following the importance ratings, several socio-demographic questions were included  
42  
43 in the surveys (Supplementary file 1). Completion of the online survey implied consent, which  
44  
45 was outlined on the information landing page for the survey.  
46  
47  
48  
49  
50  
51  
52  
53  
54  
55  
56  
57  
58  
59  
60



### Survey participants and recruitment

We recruited survey respondents using multiple online dissemination channels, such as social media (Twitter, Facebook), e-newsletters, emails, snowballing and notices posted on several websites. We also included a one-time classified ad in 31 local newspapers in small BC communities and offered telephone completion as an alternative to the online survey. Due to time and budget constraints, the surveys were only provided in English. The sole inclusion criterion was that patients and providers must be living in BC to complete the survey.

### Analysis of survey data

We report means and standard deviations of importance ratings among patients and providers. Future analyses will explore differences in the ratings by patient and provider characteristics.

### *Horizon scanning survey*

A third survey with BC researchers was included for horizon scanning purposes; namely, to capture any past, ongoing, or upcoming (in the next 12 months) research on the 10 primary care topics. This complements the rapid literature reviews, but it also enabled us to capture research that had not been published, completed or for which funding has recently been secured. This online survey presented each topic with the same 2-4 bullet point example statements. We collected information on study design and publications, as well as socio-demographics. The surveys were disseminated through similar online channels to the other surveys. As with the literature reviews, this information was used to inform the Integration phase and future development of research questions, but we do not report results herein.

## Integration phase

### *Patient, provider, researcher and policymaker dialogue event*

A final dialogue event brought patients and primary care providers together to share the survey results, and to engage in a facilitated discussion about areas of concordance and dissimilarity in the results. Patients included the Patient Advisory and others recruited to enhance the representativeness of minority populations (e.g., Indigenous peoples and newcomers to the province). We recruited a diverse mix of primary care providers, including GPs, nurses, nurse practitioners, and pharmacists.

The aim of the event was to gain a better qualitative understanding of the general perspectives of patients and primary care providers with respect to the quantitative survey results, rather than to achieve consensus on the top primary care topics for the two stakeholder groups, as in the Dialogue Model. We chose to modify the purpose of the PREFeR dialogue event in this way because it is more in line with the overall objective of the project; namely, to identify patient priorities for future primary care research. Comparing patient priorities to those of providers is an important secondary aim of PREFeR. Nevertheless, we think it is more imperative to understand where and how these might differ, rather than try to bring the views of a small subgroup of patients and primary care providers together.

In addition to the main patient and provider component, a parallel discussion was held with researchers and policymakers at the dialogue event. These stakeholders also discussed the survey findings, but the focus was on how these results might be translated into future research and their policy implications. All groups came together at the end of the event to share a

1  
2  
3 summary of their discussions with the entire group of attendees. Findings from this event will  
4  
5 be reported elsewhere.  
6  
7

## 8 9 RESULTS

### 10 11 12 13 14 Patient Advisory characteristics

15  
16  
17 In total, 11 members (8 female, 3 male) were recruited to the Patient Advisory between March  
18 and May 2017. Of these, 10 were recruited through recruitment advertisements placed with  
19 Patient Voices Network BC. A total of 3 males and 12 females replied to these ads, and we  
20 chose 3 males and 7 females. An eighth female member was recruited from another study to  
21 ensure equal representation across the five regional health authorities in the province.  
22  
23  
24

25 However, one female patient resigned at the start of the PREFeR Project and did not provide  
26 any input to the project. The final 10 Patient Advisory members (7 female, 3 male) were  
27 characterized by a mix of socio-demographic characteristics, including ethnic minority  
28 backgrounds, speaking multiple languages, born outside of Canada or the province, and  
29 representation from all five health authorities (Table 1). In line with the recruitment strategy,  
30 patients included people with both visible/congenital (one member) and invisible disabilities,  
31 experiences of long-standing chronic illness (including mental health disorders, chronic  
32 infectious disease, chronic pain). Some had recovered from very severe, life-threatening health  
33 conditions (e.g., cancer), while others had only minor needs for episodic care. The group were  
34 predominantly employed (7/10, 70%), well educated (BSc, BA, teacher's college or higher  
35 university degree: 6/9, 67%), and were considered 'experienced' (e.g., members of three or  
36  
37  
38  
39  
40  
41  
42  
43  
44  
45  
46  
47  
48  
49  
50  
51  
52  
53  
54  
55  
56  
57  
58  
59  
60

1  
2  
3 more research committees/organizations, patient partners in other studies, research  
4  
5 participant involvement, etc.) in terms of previous research involvement (6/9, 67%). The group  
6  
7 did not know each other before joining the Patient Advisory, and the PREFeR project was the  
8  
9 first task the Advisory worked on collectively.  
10  
11  
12  
13  
14  
15  
16  
17  
18  
19  
20  
21  
22  
23  
24  
25  
26  
27  
28  
29  
30  
31  
32  
33  
34  
35  
36  
37  
38  
39  
40  
41  
42  
43  
44  
45  
46  
47  
48  
49  
50  
51  
52  
53  
54  
55  
56  
57  
58  
59  
60

For peer review only

**Table 1.** Characteristics of British Columbia Primary Health Care Research Network Patient

Advisory (n=10). All values reported are N(%), unless otherwise specified.

|                                                                                                       | N (%)       |
|-------------------------------------------------------------------------------------------------------|-------------|
| Age in years (M, SD) <sup>1</sup>                                                                     | 48.4 (13.9) |
| Age range in years                                                                                    | 24-67       |
| Sex                                                                                                   |             |
| Female                                                                                                | 7 (70)      |
| Male                                                                                                  | 3 (30)      |
| Ethnicity <sup>1</sup>                                                                                |             |
| White only                                                                                            | 3 (33)      |
| Indigenous                                                                                            | 2 (20)      |
| Any other background                                                                                  | 4 (40)      |
| Language(s) spoken <sup>1</sup>                                                                       |             |
| English only                                                                                          | 5 (56)      |
| Multiple languages                                                                                    | 4 (44)      |
| Employed                                                                                              |             |
| Yes                                                                                                   | 7 (70)      |
| Highest education level <sup>1</sup>                                                                  |             |
| Trade or non-University certificate/diploma,<br>community college, University certificate<br>below BA | 3 (33)      |
| BA, teacher's college or higher                                                                       | 6 (67)      |

Country of birth<sup>1</sup>

|        |        |
|--------|--------|
| Canada | 8 (89) |
|--------|--------|

Years living in BC<sup>1</sup>

|     |        |
|-----|--------|
| 0-5 | 2 (22) |
|-----|--------|

|      |        |
|------|--------|
| 6-15 | 1 (11) |
|------|--------|

|                    |        |
|--------------------|--------|
| More than 15 years | 6 (67) |
|--------------------|--------|

## Regional Health Authority

|                          |        |
|--------------------------|--------|
| Vancouver Coastal Health | 5 (50) |
|--------------------------|--------|

|                         |        |
|-------------------------|--------|
| Vancouver Island Health | 2 (20) |
|-------------------------|--------|

|               |        |
|---------------|--------|
| Fraser Health | 1 (10) |
|---------------|--------|

|                 |        |
|-----------------|--------|
| Interior Health | 1 (10) |
|-----------------|--------|

|                 |        |
|-----------------|--------|
| Northern Health | 1 (10) |
|-----------------|--------|

Previous research involvement<sup>1,2</sup>

|      |        |
|------|--------|
| None | 1 (11) |
|------|--------|

|          |        |
|----------|--------|
| Moderate | 2 (22) |
|----------|--------|

|             |        |
|-------------|--------|
| Experienced | 6 (67) |
|-------------|--------|

---

<sup>1</sup> Data available for 9 of the 10 Patient Advisory members.

<sup>2</sup> Moderate = 2-3 years of researcher/research participant experience and/or patient partner on >2 committees/studies; Experienced = >3 years of researcher/research participant experience and/or patient partner on >3 committees/studies.

## Brainstorming primary care experiences

Two (1 male, 1 female) Patient Advisory members were unable to attend the primary care experiences teleconference in September 2017, and so their ideas were shared via a telephone call with the first author in advance. In total, these and the remaining eight Patient Advisory members (2 male, 6 female) provided 82 experiences and examples of what stood out for them in primary care in BC. There was considerable overlap in these primary care experiences, which were initially grouped into 19 themes by LE, MM, and RL (Supplementary file 2 column 1).

## Interim priority setting workshop

Nine (2 male, 7 female) of the 10 Patient Advisory members attended the in-person priority setting workshop in Vancouver, Canada in September 2017. The researcher-proposed 19 primary care themes were reviewed, discussed, and revised (Supplementary file 2, column 2; topic headings and full set of illustrative bullet points are also provided in Supplementary file 2). No additional themes were added, but 14 of the topic headings were changed and two of the researcher-suggested topics (*Impact of a new diagnosis*, *Care of chronic conditions*) were combined to form a single patient-revised topic (*Support for living with chronic conditions*). In total, 18 final topics were retained from the first part of the workshop.

Patients selected and then ranked the 10 most important topics for themselves and in consideration of their social network. The raw rankings were followed by methods of tabulating the final ranked priority topics (via scores and votes), which included the sum of scores across patients, ranked priority via scores, relative importance, ranked priority via relative importance,

1  
2  
3 and the number of votes (Supplementary file 3). There were some tied ranks, which were  
4  
5 resolved by the number of votes. For example, *Accessing care when and where patients need it*  
6  
7 and *Support for living with chronic conditions* were tied for fourth place, but the access-related  
8  
9 topic received more votes overall, and so retained the higher priority position. There was  
10  
11 consensus within the team that the top 10 topics captured the most important ideas.  
12  
13  
14  
15

### 16 **Survey participant characteristics**

17  
18  
19 Between February and May 2018, 464 patients and 173 primary care providers living and  
20  
21 working in BC completed the survey. As shown in Table 2, the majority of both patients and  
22  
23 providers were female and of White ethnicity. Most patients lived in large metropolitan areas  
24  
25 and were married or in a common-law relationship. The proportion of patient survey  
26  
27 respondents from the five regional health authorities was closely aligned with 2017 provincial  
28  
29 population estimates for Vancouver Coastal Health and Vancouver Island Health (provincial  
30  
31 estimates: 24.6% and 16.5%, respectively), but there was over-representation from Interior and  
32  
33 Northern Health (provincial estimates: 15.7% and 5.8%, respectively) and under-representation  
34  
35 from Fraser Health (provincial estimate: 37.5%)[27].  
36  
37  
38  
39  
40

41  
42 Primary care providers from Interior Health authority were over-represented, constituting over  
43  
44 half of all respondents. Providers were fairly evenly distributed between primary care  
45  
46 physicians, nurses, and all other providers such as pharmacists, physical and occupational  
47  
48 therapists, and social workers.  
49  
50  
51  
52  
53  
54  
55  
56  
57  
58  
59  
60



**Table 2.** Characteristics of patients and primary care providers completing the online survey. All values reported are N(%).

|                                      | Patients (n=464) | Providers (n=173) |
|--------------------------------------|------------------|-------------------|
| <b>Age</b>                           |                  |                   |
| Under 40 years                       | 123 (26.5)       | -                 |
| 40-59 years                          | 158 (34.0)       | -                 |
| 60+ years                            | 152 (32.7)       | -                 |
| <b>Sex</b>                           |                  |                   |
| Female                               | 368 (79.3)       | 130 (75.6)        |
| Male                                 | 77 (16.6)        | 35 (20.4)         |
| <b>Ethnicity</b>                     |                  |                   |
| White only                           | 366 (78.9)       | 130 (75.1)        |
| Mixed or any other background        | 74 (15.9)        | 22 (12.7)         |
| <b>Regional health authority</b>     |                  |                   |
| Vancouver Coastal Health             | 108 (23.3)       | 23 (13.3)         |
| Fraser Health                        | 97 (20.9)        | 19 (11.0)         |
| Vancouver Island Health              | 70 (15.1)        | 16 (9.3)          |
| Interior Health                      | 129 (27.8)       | 99 (57.2)         |
| Northern Health                      | 47 (10.1)        | 5 (2.9)           |
| Provincial Health Services Authority |                  | 9 (5.2)           |
| <b>Type of provider</b>              |                  |                   |
| Family doctor                        | -                | 52 (30.1)         |

|                                             |   |           |
|---------------------------------------------|---|-----------|
| Nurse                                       | - | 52 (30.1) |
| Other primary care provider <sup>2</sup>    | - | 10 (5.8)  |
| Community-based/allied workers <sup>3</sup> | - | 38 (22.0) |
| Hospital-based only, including consultants  | - | 21 (12.1) |

<sup>1</sup> Figures do not always sum to 464 and 173 (100%), due to no response/system missing, 'prefer not to answer', 'don't know', or 'other' responses.

<sup>2</sup> Other primary care providers included pharmacists, midwives, or any other primary care provider other than family doctors and nurses.

<sup>3</sup> Community-based/allied workers included social workers, care aides, etc.

### Survey topic importance ratings

Comparing between patient and provider topic importance mean ratings, all 10 topics were rated highly by both groups (between 4="Important" and 5="Very important") (Table 3).

Among both patients and providers, the top-ranked topic was *Unable to find a regular family doctor or other primary health care provider*. Among patients, the next six topics (*Support for chronic conditions, Information sharing (including EMR), Mental health resources, Access to care when/where needed, New models of healthcare, and Improve continuity/coordination*) were all similarly rated (means 4.41 to 4.52). The same six mid-ranked topics were similarly clustered for providers, although there was a wider range of average ratings (means 4.27 to 4.53). The final three lower-ranked topics were still equivalent to the "Important" category, on average.

Therefore, there were more similarities than differences between the rank ordering of topics for patients and providers.

**Table 3.** Mean (standard deviation) importance ratings of primary care topics listed in order of mean patient ratings

| Primary care topics                                                        | Patients (n=464) | Providers (n=173) |
|----------------------------------------------------------------------------|------------------|-------------------|
| 1) Unable to find regular family doctor/other primary health care provider | 4.64 (0.76)      | 4.59 (0.76)       |
| 2) Support for living with chronic conditions                              | 4.52 (0.75)      | 4.36 (0.88)       |
| 3) Information sharing, including EMR                                      | 4.52 (0.76)      | 4.29 (0.91)       |
| 4) Mental health resources                                                 | 4.51 (0.81)      | 4.53 (0.77)       |
| 5) Accessing care when and where patients need it                          | 4.46 (0.78)      | 4.27 (0.85)       |
| 6) New models of primary care that include other HCPs                      | 4.44 (0.83)      | 4.30 (1.03)       |
| 7) Improving continuity and coordination                                   | 4.41 (0.81)      | 4.31 (0.85)       |
| 8) Improve and strengthen patient-provider communication                   | 4.21 (0.92)      | 4.03 (1.05)       |
| 9) Challenges in small towns/cities and remote areas                       | 4.18 (0.99)      | 4.18 (0.92)       |
| 10) Care guided by patient needs, values, preferences, and priorities      | 4.09 (1.02)      | 3.95 (1.07)       |

VCH = Vancouver Coastal Health; FH = Fraser Health; VIH = Vancouver Island Health; IH = Interior Health;

NH= Northern Health; EMR = electronic medical record; HCPs = health care professionals.

## DISCUSSION

Involving patients in setting priorities for primary care research is feasible, fruitful and important to patients, but it is rare. This paper outlines the key activities of the PREFeR Project, which are framed within the Dialogue Model, and reports the processes and results from the priority setting exercises. A group of 10 patients from all five regional health authorities in the province were recruited as patient partners to a Patient Advisory group. Using the Nominal Group Technique, over 80 experiences of what stood out for them in primary care were generated. After grouping these into 18 common themes, the top 10 ranked topics were retained for rating in a province-wide survey for patients and primary care providers. The most highly rated topics for both patients and providers were about being unable to find regular family doctor/other primary health care provider, support for living with chronic conditions, information sharing, including EMR, and mental health resources. In fact, the mean ratings and rank ordering of the topics were similar for both stakeholder groups.

The 10 priorities originally identified by the Patient Advisory align fairly well with some recent priority setting initiatives in the province. The BC Ministry of Health recently identified eight service delivery priorities for the province's health system in 2014[28]. These were re-confirmed at the primary care level by the BC-PHCRN research, clinical, and policy leads in 2015[20], but no patients were involved in this process. There is considerable overlap between the previous BC-PHCRN priorities and those reported herein, although there were two uniquely-identified Patient Advisory priorities that were not advanced by either the BC Ministry of Health or BC-PHCRN: *Mental health resources* (albeit, access to specialist treatment, in general, was

1  
2  
3 mentioned by both organizations, and reducing demand on hospitals by improving care for  
4  
5 those with mental health and substance use issues was one of five strategic priorities for the BC  
6  
7 Ministry of Health in 2017[29]) and *Improve and strengthen patient-provider communication*.

8  
9  
10 There were also examples where patient perspectives added depth and context. While both  
11  
12 sets of priorities spoke to the need to address challenges specific to rural and remote settings,  
13  
14 patients highlighted that transportation needs to be considered, and privacy and stigma may  
15  
16 impact those in rural areas. The previous BC-PHCRN priorities included the need to enhance  
17  
18 access, utilization, and continuity of patient information with other providers and levels of care,  
19  
20 but patients spoke more directly to the need for electronic health records and the ability to  
21  
22 access their medical records themselves. Finally, while the previous priorities noted issues  
23  
24 around workforce planning, patients framed this as being unable to find a regular doctor or  
25  
26 other primary health care provider. This highlights the value of including patients directly in  
27  
28 setting priorities for primary care, and is another demonstration of how the priorities of  
29  
30 patients and other stakeholders might differ.  
31  
32  
33  
34  
35  
36  
37

38 The Dialogue Model, coupled with the Nominal Group Technique, was a useful framework for  
39  
40 identifying patient priorities for primary health care research. This model has been used for  
41  
42 agenda setting in many condition-specific populations, such as burns, diabetes, kidney disease,  
43  
44 cystic fibrosis, dementia, bipolar disorder[1], but PREFeR is the first instance of primary care  
45  
46 priority setting with a generic population that we are aware of. That said, the five phases of the  
47  
48 Dialogue Model were modified substantially to address the aim of PREFeR, which explicitly  
49  
50 focuses on patient priorities. Consistent with Canada's Strategy for Patient Oriented Research,  
51  
52 the Patient Advisory members were research partners in PREFeR and contributed to planning  
53  
54  
55  
56  
57  
58  
59  
60

1  
2  
3 and shaping the research activities. Their dual role as research participants and team members  
4  
5 means that, to some degree, we shifted control and power to patients within the process,  
6  
7 which is inconsistent with the Dialogue Model. This was implemented in a context where  
8  
9 policymakers, clinicians, and researchers had previously worked to identify priorities in the  
10  
11 absence of patients. Perspectives from these other stakeholder groups were, however,  
12  
13 gathered and compared to patient priorities, albeit later in the project. In the end, these  
14  
15 aligned quite closely, though patients identified some additional priorities and added additional  
16  
17 context and depth to existing ones. In addition, the language used in the final topics was agreed  
18  
19 on by patient team members, although different terminology may be more common among  
20  
21 researchers.  
22  
23  
24  
25  
26

27  
28 Another notable divergence is that we identified *topics* for future research, rather than specific  
29  
30 research questions. The top-rated topics are broad, and many reflect priorities for health  
31  
32 system change that may be informed by research, but are not themselves research questions.  
33  
34 Results from rapid literature reviews of the 10 topics, along with results from the 'horizon  
35  
36 scanning' survey with BC researchers relating to completed, current or upcoming research on  
37  
38 the 10 topics, will provide valuable information about the nature and extent of research on the  
39  
40 topics. In some cases, the topics may suggest a need for strengthened knowledge translation or  
41  
42 implementation science to inform changes to policies or service delivery rather than additional  
43  
44 research. Also, as the searches covered broad topics, but were limited to BC and Canada, we  
45  
46 recommend that more thorough reviews should be conducted that are specific to any future  
47  
48 research objectives.  
49  
50  
51  
52  
53  
54  
55  
56  
57  
58  
59  
60

1  
2  
3 The main strengths of the current research are the contribution and partnership of patients in  
4  
5 the priority setting exercises, using a structured framework to shape the research activities, and  
6  
7 the volume of patients and providers completing the online surveys. However, there are several  
8  
9 notable limitations to our approach. Although the initial priorities were developed by a group of  
10  
11 patients purposively recruited to maximize diversity, we cannot claim to have reached  
12  
13 saturation in possible topics, and we decided to limit the subsequent survey to 10 topics in  
14  
15 order to make the online surveys more manageable. We did not directly solicit additional topics  
16  
17 from survey respondents, and there are undoubtedly topics of high priority to patients missed  
18  
19 in this process. Given the survey was conducted predominantly online and largely distributed  
20  
21 within networks related to health care and health research, respondents are unlikely to be  
22  
23 representative of the province as a whole. This might affect the generalizability of these results.  
24  
25  
26  
27  
28  
29  
30  
31 This project demonstrates the feasibility of including patients in priority setting exercises and  
32  
33 offers an approach that is workable within the context of primary care, rather than a condition-  
34  
35 specific population. The identified topics overlap with, but expand on, previously identified  
36  
37 priorities, and the patient and primary care provider surveys highlighted more alignment than  
38  
39 divergence between these two stakeholder groups in rating the topics. Nevertheless, two novel  
40  
41 topics addressing mental health resources and patient-provider communication were identified  
42  
43 here, underscoring the importance of including patients in primary care priority setting. These  
44  
45 results, coupled with those of the remaining activities in this project, will jointly provide key  
46  
47  
48  
49  
50  
51 considerations for setting future primary care research questions.  
52  
53  
54  
55  
56  
57  
58  
59  
60

## Acknowledgements

We are grateful to the 10 BC-PHCRN Patient Advisory members (Yaron Butterfield, Regina Cid, Chad Dickie, Penny Henderson, Brenda Jagroop, Ravin Johl, Kent Cadogan Loftsgard, Marilyn Parker, Hayley Pelletier, and one other who wished to remain anonymous) for volunteering their time, openly sharing their experiences, and contributing so valuably to PREFeR. We thank the BC SUPPORT Unit for in-kind support and helping to publicize this study. The Patient Voices Network assisted with recruiting the Patient Advisory. The BC-PHCRN generously provided support to PREFeR, both administratively and through engagement with the Patient Advisory. The Centre for Health Services and Policy Research provided in-kind support through salary for a project coordinator. Additional co-investigators who contributed to this project: Dr Sabrina T. Wong, Dr Kim McGrail, Dr Rita McCracken, Dr Vanessa Brcic, and Victoria Schuckel.



## Footnotes

## Author Contributions

LE and MRL designed and led all phases of the project. Specific to the results reported in this paper, LE facilitated the priority setting exercises, thematically grouped the primary care experiences into topics, carried out the priority setting data entry and rankings, and drafted this paper. MRL is the PI for the PREFeR Project, oversaw all phases of the project, and contributed feedback to this paper. MRL and MM recruited the Patient Advisory members. MM led early engagement with the Patient Advisory, oversaw all administrative activities for and helped facilitate the priority setting exercises, and provided feedback on this paper. YB, RJ, KCL, HP are members of the BC Primary Health Care Research Network Patient Advisory and patient partners in PREFeR who provided feedback on this paper, as well as contributing to all aspects of the priority setting exercises reported herein. CMcG provided background information and training on research to the Patient Advisory, provided additional support at the priority setting workshop, and commented on this paper.

## Funding

This work was supported by the Canadian Institutes of Health Research Patient-Oriented Research Collaboration (Grant number 151801).

## Competing interests

None declared.

## Ethical approval

Ethics approval advice was sought and was deemed not required by the Simon Fraser University Research Ethics Board for the Consultation and Exploration phases of the project involving the Patient Advisory. Harmonized ethical approval was granted by the Simon Fraser University and the University of British Columbia Research Ethics Boards (Reference number 20018s0051).

## Data sharing

Online survey data from 464 patients and 173 primary care providers, anonymously provided, which includes ratings of the importance of the top 10 patient-generated primary care topics. Data are available from Dr M Ruth Lavergne (Email: ruth\_lavergne@sfu.ca).

## References

- 1 Raeymaekers P. Mind the gap! Multi-stakeholder dialogue for priority setting in health research. Brussels: King Baudouin Foundation; 2016:7–42. <https://www.kbs-frb.be/en/Activities/Publications/2016/20160426PP> (accessed 3 Aug 2017).
- 2 Stewart RJ, Caird J, Oliver K, et al. Patients' and clinicians' research priorities: patients' and clinicians' research priorities. *Health Expect*. 2011;14:439–48. doi: 10.1111/j.1369-7625.2010.00648.x
- 3 Tong A, Crowe S, Chando S, et al. Research priorities in CKD: report of a national workshop conducted in Australia. *Am J Kidney Dis*. 2015;66:212–22. doi: 10.1053/j.ajkd.2015.02.341
- 4 Crowe S, Fenton M, Hall M, et al. Patients', clinicians' and the research communities' priorities for treatment research: there is an important mismatch. *Res Involv Engagem*. 2015;1:2. doi: 10.1186/s40900-015-0003-x
- 5 Chalmers I, Bracken MB, Djulbegovic B, et al. How to increase value and reduce waste when research priorities are set. *Lancet*. 2014;383:156–65. doi: 10.1016/S0140-6736(13)62229-1
- 6 Manafò E, Petermann L, Vandall-Walker V, et al. Patient and public engagement in priority setting: a systematic rapid review of the literature. *PLoS ONE*. 2018;13:e0193579. doi: 10.1371/journal.pone.0193579
- 7 Kirwan JR, de Wit M, Frank L, et al. Emerging guidelines for patient engagement in research. *Value Health*. 2017;20:481–6. doi: 10.1016/j.jval.2016.10.003
- 8 NAPCRG's Research Advocacy Committee. Primary care research priorities identified and shared with stakeholders. *Ann Fam Med*. 2014;12:381–2. doi: 10.1370/afm.1678
- 9 Ball L, Barnes K, Leveritt M, et al. Developing research priorities in Australian primary health care: a focus on nutrition and physical activity. *Aust J Prim Health*. 2017;23:554–559. doi: 10.1071/PY16068
- 10 MacFarlane A, Galvin R, O'Sullivan M, McInerney C, Meagher E, Burke D, et al. Participatory methods for research prioritization in primary care: an analysis of the World Café approach in Ireland and the USA. *Fam Pract*. 2017;34:278–284. doi: 10.1093/fampra/cmw104
- 11 Blaum C, Tinetti M, Rich MW, Hoy L, Hoy S, Esterson J, et al. A research agenda to support patient priorities care for adults with multiple chronic conditions [White paper]. Patient-Centered Outcomes Research Institute; 2017. <https://www.pcori.org/sites/default/files/NYU2870-White-Paper.pdf> (accessed 19 Jan 2019)
- 12 Yoshida S. Approaches, tools and methods used for setting priorities in health research in the 21(st) century. *J Glob Health*. 2016;6:010507. doi: 10.7189/jogh.06.010507
- 13 The James Lind Alliance. The James Lind Alliance Guidebook, Version 7. Southampton: National Institute for Health Research Evaluation, Trials and Studies Coordinating Centre, 2018. <http://www.jla.nihr.ac.uk/jla-guidebook/downloads/Print-JLA-guidebook-version-7-March-2018.pdf> (accessed 16 Jul 2018).

- 1  
2  
3 14 Broerse JEW, Zweekhorst MBM, van Rensen AJML, et al. Involving burn survivors in agenda setting on  
4 burn research: an added value? *Burns*. 2010;36:217–31. doi: 10.1016/j.burns.2009.04.004  
5  
6 15 The James Lind Alliance. The James Lind Alliance Guidebook, Version 6. Southampton: National  
7 Institute for Health Research Evaluation, Trials and Studies Coordinating Centre, 2016.  
8 <http://www.jla.nihr.ac.uk/jla-guidebook/downloads/JLA-Guidebook-Version-6-February-2016.pdf>  
9 (accessed 30 Aug 2017).  
10  
11 16 Ryan M, Scott D, Reeves C, et al. Eliciting public preferences for healthcare: a systematic review of  
12 techniques. *Health Technol Assess*. 2001;5:1–186.  
13  
14 17 Rudan I, Kapiriri L, Tomlinson M, et al. Evidence-based priority setting for health care and research:  
15 tools to support policy in maternal, neonatal, and child health in Africa. *PLoS Med*. 2010;7:e1000308.  
16 doi: 10.1371/journal.pmed.1000308  
17  
18 18 Cochrane Priority Setting Methods Group. Plain language summaries of research priority setting  
19 methods. [https://methods.cochrane.org/prioritysetting/plain-language-summaries-research-priority-](https://methods.cochrane.org/prioritysetting/plain-language-summaries-research-priority-setting-methods)  
20 [setting-methods](https://methods.cochrane.org/prioritysetting/plain-language-summaries-research-priority-setting-methods) (accessed 16 Jul 2018).  
21  
22 19 Canadian Institutes of Health Research. Canada’s Strategy for Patient-Oriented Research: improving  
23 health outcomes through evidence-informed care; 2011. [http://www.cihr-irsc.gc.ca/e/documents/P-](http://www.cihr-irsc.gc.ca/e/documents/P-O_Research_Strategy-eng.pdf)  
24 [O\\_Research\\_Strategy-eng.pdf](http://www.cihr-irsc.gc.ca/e/documents/P-O_Research_Strategy-eng.pdf) (accessed 19 Jan 2019)  
25  
26 20 BC Primary Health Care Research Network. Research priorities. [https://spor-](https://spor-bcphcrn.ca/about/research-priorities/)  
27 [bcphcrn.ca/about/research-priorities/](https://spor-bcphcrn.ca/about/research-priorities/) (accessed 16 Jul 2018).  
28  
29 21 Domecq JP, Prutsky G, Elraiyah T, et al. Patient engagement in research: a systematic review. *BMC*  
30 *Health Serv Res*. 2014;14:89. doi: 10.1186/1472-6963-14-89  
31  
32 22 Delbecq A, van de Ven A, Gustafson D. Group techniques for program planning, a guide to nominal  
33 group and Delphi processes. Glenview, IL: Scott, Foresman and Company, 1975.  
34  
35 23 McMillan SS, Kelly F, Sav A, Kendall E, King MA, Whitty JA, et al. Using the Nominal Group Technique:  
36 how to analyse across multiple groups. *Health Serv Outcomes Res Methodol*. 14:92–108. doi:  
37 10.1007/s10742-014-0121-1  
38  
39 24 Rice DB, Cañedo-Ayala M, Turner KA, Gumuchian ST, Malcarne VL, Hagedoorn M, et al. Use of the  
40 nominal group technique to identify stakeholder priorities and inform survey development: an example  
41 with informal caregivers of people with scleroderma. *BMJ Open*. 2018;8:e019726. doi:  
42 10.1136/bmjopen-2017-019726  
43  
44 25 Sink DS. Using the nominal group technique effectively. *Natl Product Rev*. 1983;2:173–84. doi:  
45 10.1002/npr.4040020209  
46  
47 26 Gastelurrutia MA, Benrimoj SIC, Castrillon CC, et al. Facilitators for practice change in Spanish  
48 community pharmacy. *Pharm World Sci*. 2009;31:32–9. doi: 10.1007/s11096-008-9261-0  
49  
50 27 Government of British Columbia. Sub-provincial population estimates.  
51 <http://www.bcstats.gov.bc.ca/apps/PopulationEstimates.aspx> (accessed 22 Aug 2018)  
52  
53  
54  
55  
56  
57  
58  
59  
60

1  
2  
3 28 British Columbia Ministry of Health. Setting priorities for the B.C. health system. 2014.  
4 <http://www.health.gov.bc.ca/library/publications/year/2014/Setting-priorities-BC-Health-Feb14.pdf>  
5 (accessed 16 Jul 2018).  
6

7  
8 29 British Columbia Ministry of Health. Ministry of Health patients as partners 2017 provincial dialogue  
9 report. 2017. [https://www2.gov.bc.ca/assets/gov/health/about-bc-s-health-care-system/heath-care-](https://www2.gov.bc.ca/assets/gov/health/about-bc-s-health-care-system/heath-care-partners/patients-as-partners/provincial-annual-dialogue-report-2017.pdf)  
10 [partners/patients-as-partners/provincial-annual-dialogue-report-2017.pdf](https://www2.gov.bc.ca/assets/gov/health/about-bc-s-health-care-system/heath-care-partners/patients-as-partners/provincial-annual-dialogue-report-2017.pdf) (accessed 16 Jul 2018)  
11  
12

## 13 14 15 Figure Legend

16  
17  
18 Figure 1. Key activities of the PREFeR Project, framed within the five phases of a modified Dialogue  
19  
20

21 Model  
22  
23  
24  
25  
26  
27  
28  
29  
30  
31  
32  
33  
34  
35  
36  
37  
38  
39  
40  
41  
42  
43  
44  
45  
46  
47  
48  
49  
50  
51  
52  
53  
54  
55  
56  
57  
58  
59  
60

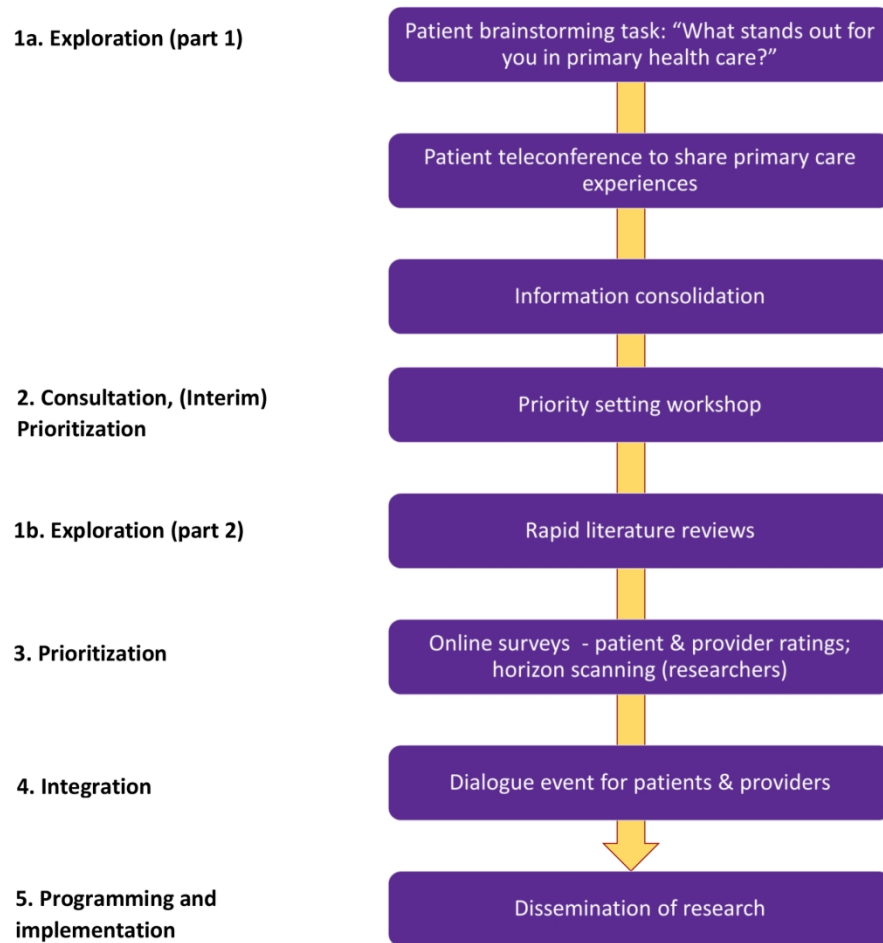

Figure 1. Key activities of the PREFeR Project, framed within the five phases of a modified Dialogue Model

Key activities of the PREFeR Project, framed within the five phases of a modified Dialogue Model

173x196mm (300 x 300 DPI)

## Online survey questions – Patient version

### [Page 1 questions] **How important are these topics to you?**

Below are the 10 topics that have been identified by patients as primary health care priorities, which could be developed into more specific research questions.

It is important that everyone understands what each topic means in a similar way. For this reason, we include some statements or experiences from patients that help illustrate each topic. These examples are listed as bullet points under each topic.

When we use the term *primary health care provider*, we mean health care professionals, such as family doctors (GPs), nurses, and nurse practitioners.

- **After you have read all of the bullet points under each general topic, please rate EACH of the following 10 topics in terms of how important they are to you as a patient.**
- This may include how important they are to you personally, as well as how they affect people who are important to you (your friends and family members).
- Please rate each topic on its own. It is fine to use the same rating for more than one topic.

### **How important are each of these topics to you on a scale from *Not at all important* to *Very important*?**

#### **1) Unable to find a regular family doctor or other primary health care provider**

*Example statements or experiences:*

- Not all patients are able to find a primary health care provider accepting patients
- Patients find it hard to get the care they need without a consistent primary health care provider (e.g., family doctor)

|                         |                       |                         |                       |                       |                                 |
|-------------------------|-----------------------|-------------------------|-----------------------|-----------------------|---------------------------------|
| 1                       | 2                     | 3                       | 4                     | 5                     | 6                               |
| <input type="radio"/>   | <input type="radio"/> | <input type="radio"/>   | <input type="radio"/> | <input type="radio"/> | <input type="radio"/>           |
| Not at all<br>important | Slightly<br>important | Moderately<br>important | Important             | Very<br>important     | Don't<br>know/Not<br>applicable |

#### **2) Improve and strengthen communication between patients and primary health care providers**

*Example statements or experiences:*

- Identify strategies to help health care providers understand the concerns, priorities and/or symptoms that patients are trying to communicate

- Find ways to improve decision-making that is shared between patients and primary health care providers
- Find solutions to problems caused by language and communication barriers

| 1                     | 2                     | 3                     | 4                     | 5                     | 6                         |
|-----------------------|-----------------------|-----------------------|-----------------------|-----------------------|---------------------------|
| <input type="radio"/>     |
| Not at all important  | Slightly important    | Moderately important  | Important             | Very important        | Don't know/Not applicable |

### 3) Mental health resources

*Example statements or experiences:*

- Limited or no availability of resources for mental health, addictions and substance use needs through primary care
- Gap between primary care and specialist services
- It is common for people to experience mental health issues at the same time as they are also experiencing physical health conditions, and this situation is poorly managed

| 1                     | 2                     | 3                     | 4                     | 5                     | 6                         |
|-----------------------|-----------------------|-----------------------|-----------------------|-----------------------|---------------------------|
| <input type="radio"/>     |
| Not at all important  | Slightly important    | Moderately important  | Important             | Very important        | Don't know/Not applicable |

### 4) Support for living with chronic conditions

*Example statements or experiences:*

- Limited time in appointments to manage chronic conditions
- It can be difficult to find a family doctor if patients are perceived to have 'complex' conditions
- Without a family doctor, there is no support for management of a chronic disease (e.g., getting repeat prescriptions)
- Continuity of care is essential when living with a chronic disease
- Clear communication about what patients can expect and what should happen next is needed, especially because there can be long periods of time between appointments

| 1                     | 2                     | 3                     | 4                     | 5                     | 6                         |
|-----------------------|-----------------------|-----------------------|-----------------------|-----------------------|---------------------------|
| <input type="radio"/>     |
| Not at all important  | Slightly important    | Moderately important  | Important             | Very important        | Don't know/Not applicable |



## 5) Accessing care when and where patients need it

*Example statements or experiences:*

- Few options exist for after-hours care (outside of normal working hours, weekends)
- Patients weigh convenience of walk-in clinics and easier access to emergency departments over the desire to see a regular doctor
- There is a need for care in patients' homes and long-term care

|                       |                       |                       |                       |                       |                           |
|-----------------------|-----------------------|-----------------------|-----------------------|-----------------------|---------------------------|
| 1                     | 2                     | 3                     | 4                     | 5                     | 6                         |
| <input type="radio"/>     |
| Not at all important  | Slightly important    | Moderately important  | Important             | Very important        | Don't know/Not applicable |

## 6) Improving continuity and coordination

*Example statements or experiences:*

- Need for primary health care providers to coordinate care (i.e., communicate with specialists, organize care between hospital and community)
- Problems accessing primary health care providers make it difficult to maintain continuity with the same health care professional
- Lack of consistency when seeing multiple health care professionals with different levels of expertise

|                       |                       |                       |                       |                       |                           |
|-----------------------|-----------------------|-----------------------|-----------------------|-----------------------|---------------------------|
| 1                     | 2                     | 3                     | 4                     | 5                     | 6                         |
| <input type="radio"/>     |
| Not at all important  | Slightly important    | Moderately important  | Important             | Very important        | Don't know/Not applicable |

## 7) New models of primary care that include other health care professionals

*Example statements or experiences:*

- Need for a community of health care professionals (e.g., nurse practitioners, pharmacists, etc.) that takes advantage of their full expertise
- Need for better collaboration and cooperation among health care professionals and health disciplines
- Need for other options to access primary care services that do not require an in-person visit with a family doctor (e.g., prescription renewals)

|                       |                       |                       |                       |                       |                           |
|-----------------------|-----------------------|-----------------------|-----------------------|-----------------------|---------------------------|
| 1                     | 2                     | 3                     | 4                     | 5                     | 6                         |
| <input type="radio"/>     |
| Not at all important  | Slightly important    | Moderately important  | Important             | Very important        | Don't know/Not applicable |

## 8) Information sharing, including electronic medical records

*Example statements or experiences:*

- The lack of coordinated information sharing between health care professionals means re-telling health 'story' repeatedly
- Treatments/information given may not always be communicated between health professionals and across settings, including walk-in clinics, home-care, hospital
- Patients are unable to access their own medical records
- Patient should not need to manage communication among their health care providers

| 1                     | 2                     | 3                     | 4                     | 5                     | 6                         |
|-----------------------|-----------------------|-----------------------|-----------------------|-----------------------|---------------------------|
| <input type="radio"/>     |
| Not at all important  | Slightly important    | Moderately important  | Important             | Very important        | Don't know/Not applicable |

## 9) Care guided by patient needs, values, preferences, and priorities

*Example statements or experiences:*

- A variety of treatment options should be explained and offered, including non-drug alternatives
- More holistic approach needed, where the whole person is treated, not just whatever particular body part/system is 'ill'
- Find ways to meet individual patients' expectations for information, especially in the context of widespread access to online information

| 1                     | 2                     | 3                     | 4                     | 5                     | 6                         |
|-----------------------|-----------------------|-----------------------|-----------------------|-----------------------|---------------------------|
| <input type="radio"/>     |
| Not at all important  | Slightly important    | Moderately important  | Important             | Very important        | Don't know/Not applicable |

## 10) Challenges in small towns/cities and remote areas

*Example statements or experiences:*

- Less choice and availability of primary care providers, and less access to specialists and diagnostic testing
- Transportation needs before/after care must be considered
- Privacy/stigma issues may significantly impact those in rural areas (e.g., prescription pick-up)

| 1                     | 2                     | 3                     | 4                     | 5                     | 6                         |
|-----------------------|-----------------------|-----------------------|-----------------------|-----------------------|---------------------------|
| <input type="radio"/>     |
| Not at all important  | Slightly important    | Moderately important  | Important             | Very important        | Don't know/Not applicable |

Please use this space if you have any comments you'd like to share:

[Page 2 questions]

## General information about you

In order for us to better understand possible differences between groups of people in ratings of primary health care topics, please complete the following anonymous information about yourself. It is important for us to have an accurate understanding of who is completing these surveys, but we will not be able to identify you from your answers.

### 1. How old are you?

- Under 20 years
- 20-29 years
- 30-39 years
- 40-49 years
- 50-59 years
- 60-69 years
- 70-79 years
- 80-89 years
- Over 90 years
- Prefer not to say

### 2. How do you describe yourself?

- Male
- Female
- Transgender
- Do not identify as female, male, or transgender
- Prefer not to say

1  
2  
3 **3. You may belong to one or more racial or cultural groups on the following list. Are**  
4 **you... ? (Check ALL that apply.)**

- 5  
6  White  
7  
8  Chinese  
9  
10  Aboriginal (First Nations, Métis, or Inuit)  
11  South Asian (e.g., East Indian, Pakistani, Sri Lankan, etc.)  
12  
13  Black  
14  
15  Filipino  
16  
17  Latin American  
18  Southeast Asian (e.g., Cambodian, Indonesian, Laotian, Vietnamese, etc.)  
19  
20  Arab  
21  
22  West Asian (e.g., Afghan, Iranian)  
23  
24  Japanese  
25  
26  Korean  
27  Other, please specify: \_\_\_\_\_  
28  
29  Prefer not to say  
30

31 **4. What is the name of the town or city you currently live in?** \_\_\_\_\_  
32

33 *NB: If you live in more than one place, please put the place you live the majority of the*  
34 *time.*

35  
36 **5. What are the first 3 digits of your postal code?** \_\_\_\_\_  
37

38 *NB: We cannot identify where you live from this information, but it allows us to know*  
39 *roughly where people completing the survey live.*

40 *NB: If you live in more than one place, please put the place you live the majority of the*  
41 *time.*  
42

43  
44 **6. How many years have you been living in BC?**

45 If you moved away and came back to BC, we are interested in the number of years you  
46 have been living in BC since returning to BC most recently.

- 47  
48  I live outside of BC  
49  
50  0-2 years  
51  
52  3-5 years  
53  
54  6-10 years  
55  
56  11-15 years  
57  
58  
59  
60

1  
2  
3  
4  More than 15 years

5  
6 **7. What is your marital status?**

7  Single/never legally married

8  
9  Married

10  
11  Living common-law

12  
13  Separated, but still legally married

14  
15  Divorced

16  
17  Widowed

18  
19  Prefer not to say

20  
21 **8. What is your highest level of education?**

22  Some elementary/junior school, but not all grades completed

23  
24  Completed elementary/junior school

25  
26  High school (secondary school) diploma or certificate

27  
28  Trade certificate or diploma from a vocational school or apprenticeship training

29  
30  Non-university certificate or diploma from a community college, CEGEP, school of nursing, etc.

31  
32  University certificate below bachelor's level

33  
34  Bachelor's degree or teacher's college (e.g., B.A., B.A. (Hons.), B.Sc., B.Ed.)

35  
36  University degree or certificate above bachelor's degree (e.g., M.A., M.Sc., M.B.A., M.D., Ph.D.)

37  
38  Other, please specify: \_\_\_\_\_

39  
40  
41  Prefer not to say

42  
43 **9. Last week, was your main activity working at a paid job or business, looking for paid work, going to school, caring for children, household work, retired or something else?**

44  
45  Working at a paid job or business

46  
47  Vacation (from paid work)

48  
49  Looking for paid work

50  
51  Going to school (including vacation from school)

52  
53  Caring for children

54  
55  Household work

56  
57  Retired

- 1  
2  
3  
4  Maternity/paternity leave  
5  Long-term illness  
6  
7  Volunteering  
8  
9  Care-giving other than for children  
10  
11  Other (please specify): \_\_\_\_\_  
12  
13  Prefer not to say

14 **10. What kind of housing do you currently live in?**

- 15  
16  Owned house, duplex or townhouse (not including motorhome)  
17  
18  Owned apartment or condominium  
19  
20  Owned motorhome  
21  
22  Rented house, duplex or townhouse  
23  
24  Rented apartment or condominium  
25  
26  Assisted-living (community group housing)  
27  
28  Other, please specify: \_\_\_\_\_  
29  
30  Prefer not to say

31 **11. Do you currently have any of the following long-term health conditions?**

32 **We are interested in "long-term conditions" which are expected to last or have**  
33 **already lasted 6 months or more and that have been diagnosed by a health**  
34 **professional. (Check ALL that apply.)**

- 35  
36  Asthma  
37  
38  Chronic bronchitis, emphysema or chronic obstructive pulmonary disease or COPD  
39  
40  Arthritis (for example, osteoarthritis, rheumatoid arthritis, gout or any other type,  
41 excluding fibromyalgia)  
42  
43  Back problems, excluding scoliosis, fibromyalgia and arthritis  
44  
45  Mood disorder (such as depression, bipolar disorder, mania or dysthymia)  
46  
47  Anxiety disorder (such as a phobia, obsessive-compulsive disorder or a panic disorder)  
48  
49  Diabetes  
50  
51  Osteoporosis  
52  
53  High blood pressure  
54  
55  High blood cholesterol or lipids  
56  
57  Heart disease  
58  
59  
60

- 1  
2  
3  
4      Stroke  
5      Cancer  
6  
7      Alzheimer's Disease or any other dementia  
8  
9      Other, please specify: \_\_\_\_\_  
10  
11     None of these  
12  
13     Prefer not to say

14    **12. Do you have a regular health care provider in BC? By this, we mean one health**  
15    **professional that you regularly see or talk to when you need care or advice for your**  
16    **health.**

17  
18  
19     Yes    No

20  
21        **a. What is the reason why you do not have a regular health care provider?**

- 22            Do not need one in particular, but you have a usual place of care  
23            No one available in the area  
24            No one in the area is taking new patients  
25            I have not tried to find one  
26            Had one who left or retired  
27            Other (please specify): \_\_\_\_\_  
28  
29  
30  
31  
32  
33  
34  
35  
36  
37  
38  
39  
40  
41  
42  
43  
44  
45  
46  
47  
48  
49  
50  
51  
52  
53  
54  
55  
56  
57  
58  
59  
60

## Researcher-suggested primary care topic headings compared to patient-revised topic headings

| Researcher-proposed topic headings                      | Patient-revised topic headings                                                             |
|---------------------------------------------------------|--------------------------------------------------------------------------------------------|
| 1) More patient-centred care needed                     | 1) Care guided by patient needs, values, preferences, and priorities                       |
| 2) Communication – Informing/empowering patients        | 2) Informing and empowering patients                                                       |
| 3) Improving patient-provider communication             | 3) Improve and strengthen communication between patients and primary health care providers |
| 4) Electronic Medical Records (EMR)/information sharing | 4) Information sharing, including electronic medical records                               |
| 5) Resources to better manage one's own health          | 5) Resources to better manage one's own health                                             |
| 6) Prevention/early intervention                        | 6) Prevention/early intervention                                                           |
| 7) Inability to access regular family doctors (GPs)     | 7) Unable to find a regular family doctor or other primary health care provider            |



|                                                       |                                                                                                             |
|-------------------------------------------------------|-------------------------------------------------------------------------------------------------------------|
| 8) Inadequacy of walk-in clinics                      | 8) Inadequacy of compensation model where doctors receive a set amount of money per visit (fee-for-service) |
| 9) Accessing after-hours care                         | 9) Accessing care where and when patients need it                                                           |
| 10) Access to specialist knowledge                    | 10) Access to specialist knowledge                                                                          |
| 11) Impact of a new diagnosis                         | 11) Support for living with chronic conditions                                                              |
| 12) Care of chronic conditions                        |                                                                                                             |
| 13) Accessing mental health resources                 | 12) Mental health resources                                                                                 |
| 14) Challenges in small towns/cities                  | 13) Challenges in small towns/cities and remote areas                                                       |
| 15) Patient stigma                                    | 14) Addressing stigma and bias                                                                              |
| 16) Gaps in clinical evidence/information             | 15) Knowledge gaps in clinical evidence and information                                                     |
| 17) Broaden roles for other health care professionals | 16) New models of primary care that include other health care professionals                                 |
| 18) Inefficient practices put pressure on the system  | 17) Improving continuity and coordination                                                                   |

1  
2  
3  
4  
5  
6  
7  
8  
9  
10  
11  
12  
13  
14  
15  
16  
17  
18  
19  
20  
21  
22  
23  
24  
25  
26  
27  
28  
29  
30  
31  
32  
33  
34  
35  
36  
37  
38  
39  
40  
41  
42  
43  
44  
45  
46  
47  
48  
49  
50  
51  
52  
53  
54  
55  
56  
57  
58  
59  
60

|                            |                            |
|----------------------------|----------------------------|
| 19) No universal drug plan | 18) No universal drug plan |
|----------------------------|----------------------------|

## Patient-revised topics and full list of bullet point examples and experiences from the interim priority setting workshop

### 1) Care guided by patient needs, values, preferences, and priorities

- “Block and tackle” approach to protecting territory (i.e., using defensive/offensive tactics), rather than patient-centred care
- Care needs to keep pace with patients’ expectations for information, especially in the context of widespread access to online information
- Need to embark on a journey of discovery with the patient
- Role of primary care provider is to be a coordinator of care in a team-based setting
- More holistic approach needed, where the whole body is treated, not just whatever particular part/system is ‘ill’
- Consideration of non-pharmacological options for treatment

### 2) Informing and empowering patients

- Information not explained to patient adequately
- Not all treatment options explained/offered, especially around alternative medicine
- Advice needs to be targeted in a way that patients know how to take action (don’t just give diagnosis)
- Information not clearly communicated to patients about how/why something being prescribed
- Treatment recommendations need to be appropriate for/tailored to the needs of the community (including low-income)
- Resources patients are directed to need to be appropriate and available based on needs of the community (including low-income)
- Guidance on red flags and when to seek care
- Strategies to address/accept ‘new normal’ after a new diagnosis
- Shock of new diagnosis may impair understanding/ability to ask questions during initial consultation
- Understanding individual patient priorities for their care and targeting care appropriately

### 3) Improve and strengthen communication between patients and primary health care providers

- Patients may not describe underlying issue/relevant symptoms, but questioning could identify it
- Patients may not have time/ability to process information to ask all questions during a consultation
- Enhancing decision-making shared between patients and providers
- Addressing language barriers in care
- Use recap strategy to check understanding

### 4) Information sharing, including electronic medical records

- Lack of coordinated information sharing between health care professionals (especially health authorities) means re-telling 'story' repeatedly & treatments/information given may never be known between health professionals and across settings including walk-in clinics, home-care, hospital
- Patients unable to access own EMR including clinical notes
- EMR often not reviewed before patient appointment, which leads to gaps in care
- Pharamnet works well in transferring prescription information between health authorities, but medical records don't similarly transfer
- Patient should not need to manage all of the communication within a care team
- Streamlined processes for patient-led consent and information sharing

### 5) Resources to better manage one's own health

- No access to EMR including clinical notes
- Should be ability to access information without seeing PHC physician (e.g., patient portal, patient-led chronic disease programming)
- No resources to help understand what patients can do to manage their own health (knowing schedule for check-ups, screening etc.)
- Lack of patient knowledge of clinical guidelines
- Patients need help interpreting what is and what isn't evidence-based
- Clarity needed around what to do when new to the province
- Need for centralized repositories with quality resources and programs available, including support groups

## 6) Prevention/early intervention

- Preventative medicine and lifestyle management not prioritized
- When, why and which health care professionals should do screening
- Lack of early interventions leads to poorer outcomes and higher cost down the road
- Roles for other professionals in preventative health care and lifestyle management

## 7) Unable to find a regular family doctor or other primary health care provider

- Weighing up convenience of walk-in over desire to see GP
- Places pressure on the emergency department
- Patients feel like a “product of the system”
- Hard to navigate healthcare system
- Receptionists act as gatekeepers (but without providing enough information)
- More students need to go into family practice
- Environmental/natural disasters impact patient health, which puts even further pressure on the system

## 8) Inadequacy of compensation model where doctors receive a set amount of money per visit (fee-for-service)

- Often not possible to discuss multiple, interrelated issues (chronic conditions)
- Encourages walk-in clinic practice which does not meet patient needs
- Walk-in clinics –line ups for appointments are for long periods (not suitable for some patients/weather) & waiting space isn't adequate
- Need research to understand how to most effectively compensate physician

## 9) Accessing care where and when patients need it

- Few options for after-hours care
- Need for care in home and long-term care
- Suitability of waiting space and physical design of clinics

## 10) Access to specialist knowledge

- Need for rapid access to specialist care for specific questions
- Processes to get specialist information that reduce need for face-to-face access to a specialist

- Need to keep patient in-the-loop on communication between primary care and specialists
- Direct access to specialists to answer a question

## 11) Support for living with chronic conditions

- No support for management of a chronic disease without a family doctor
- Family GPs refusing to accept patients with 'complex' conditions & ethics/implications of this
- Difficult to get repeat prescriptions filled without family GP
- Limited time with physician and nurse, especially with chronic conditions
- GPs could notify patients of support programs to help cope, including peer-to-peer support
- Some conditions cause cognitive difficulties (e.g., memory problems, difficulty processing or not correctly interpreting information)
- After a course of treatment, patient left somewhat alone dealing with side effects & feeling of being on own
- Can be long intervals between appointments & patient can 'feel lost' in this time interval
- Patient and doctor misconceptions likely with understanding condition/treatments
- Differentiation between chronic conditions and acquired conditions and recognition that there isn't always a causal relationship between them
- Continuity of care is essential in the context of chronic disease
- Clear communication of prognosis and pathway of care going forward, including the spectrum of possibilities

## 12) Mental health resources

- Often limited or no availability of resources for mental health and substance use needs
- Gap between primary care and specialists services, particularly in the absence of a diagnosis
- Information needed on how to access mental health and substance use resources
- Primary care physicians (and Emergency doctors) not qualified to manage complex mental health needs, so patients access acute care more often
- Co-existence of mental health and physical conditions poorly managed

### 13) Challenges in small towns/cities and remote areas

- Primary care doctors need to do more, since there are fewer specialists in small towns/cities
- Transportation needs must be considered
- Improved access to specialists also needed
- Less access to diagnostic testing
- Less choice/availability for doctors/treatments, which has larger impact on 'complex' conditions
- Privacy/stigma issues in rural areas (e.g., prescription pick-up)

### 14) Addressing stigma and bias

- Cultural safety and competency
- Community sensitivities
- Care for LGBTQ communities
- Stigma particular to transgender community
- Assumptions made based on health condition/background/socioeconomic status
- Effects of terminology, diagnoses, etc.
- Impact of stigma and bias on patient outcomes

### 15) Knowledge gaps in clinical evidence and information

- Issues of consistency across doctors when seeing multiple providers and levels of expertise (of GPs)
- GPs appear uncertain of correct course of care, or reluctant to perform procedures (provide clinical 'judgement')
- Knowledge and application of clinical guidelines
- Continuing education for practicing professionals
- Need to study who responds, not just the treatments themselves
- Treatment recommendations need to be appropriate for/tailored to the needs of the community (including low-income)
- Speed of implementation of scientific research (17 years) needs to be improved
- Patients want new treatments now, even though full evidence base may not be there
- Patients aware of differences in treatments between provinces and countries and want access to full set of options
- Scientific/research models only useful insofar as they predict outcomes in the real world – Magnitude of effect needs to be considered

## 16) New models of primary care including other health care professionals

- Need for better collaboration and cooperation among health care professionals and health disciplines
- Expanded roles for other health care professionals
- Better support needed for caregivers and home support workers, including respite care

## 17) Improving continuity and coordination

- Care outside of office (long-term care, home care) and outside of office hours is needed to ensure continuity
- Reluctance to renew prescriptions for more than three months
- Unnecessary appointments required to access services (e.g. vaccinations, physiotherapists)
- New questions occur to patients after an appointment, but no one to ask/have to make a new appointment to have these questions answered
- Emergency respondents appear well-trained, but often involves 4-6 health professionals
- Patients discharged from secondary care without ensuring adequate services in place (transportation, clean/safe home, family pressure/stress)

## 18) No universal drug plan

- Patients' limitations, needs & affordability/financial issues must be taken into account
  - Some 'over-the-counter' products are cheaper
  - Patients may skip/halve medications (appear non-adherent, but can't afford 'as prescribed')
  - Lack of coverage for prescription drugs puts pressure on the system elsewhere
- Difficulties with pharmacies inputting out-of-province information (when new to BC)
- Education for primary care providers on cost of prescription drugs to guide prescribing decisions

1  
2  
3  
4  
5  
6  
7  
8  
9  
10  
11  
12  
13  
14  
15  
16  
17  
18  
19  
20  
21  
22  
23  
24  
25  
26  
27  
28  
29  
30  
31  
32  
33  
34  
35  
36  
37  
38  
39  
40  
41  
42  
43  
44  
45  
46  
47

Patient-ranked raw scores (n=9) for primary care topics and methods of tabulating the top 10 priority topics

| Topic <sup>1</sup>                | Ranked scores by patients <sup>2</sup>                        |   |    |   |   |    |    |    |    |    | Sum of scores | Ranked priority (via scores) | Relative importance (%) <sup>3</sup> | Ranked priority (via %) | Number of votes | Final ranked priority (via scores & votes) |
|-----------------------------------|---------------------------------------------------------------|---|----|---|---|----|----|----|----|----|---------------|------------------------------|--------------------------------------|-------------------------|-----------------|--------------------------------------------|
|                                   | 1                                                             | 2 | 3  | 4 | 5 | 6  | 7  | 8  | 9  |    |               |                              |                                      |                         |                 |                                            |
|                                   | Care guided by patient needs, values, preferences, priorities | 7 |    | 9 |   | 10 |    | 10 | 8  | 7  |               |                              |                                      |                         |                 |                                            |
| Information sharing, EMR          | 5                                                             | 1 | 8  | 6 | 5 |    | 7  | 6  | 8  | 46 | 2             | 9.3                          | 2                                    | 8                       | 2               |                                            |
| Unable to find a doctor           |                                                               |   | 10 | 3 |   |    | 10 | 4  | 5  | 10 | 42            | 3                            | 8.5                                  | 3                       | 6               | 3                                          |
| Accessing care when, where needed | 9                                                             | 7 | 4  | 3 | 2 | 8  | 3  |    | 5  | 41 | 4             | 8.3                          | 4                                    | 8                       | 4               |                                            |
| Support for chronic conditions    |                                                               |   | 8  | 1 | 8 |    | 6  | 2  | 10 | 6  | 41            | 4                            | 8.3                                  | 4                       | 7               | 5                                          |
| Mental health resources           | 8                                                             | 4 |    | 4 | 8 | 1  |    | 3  | 9  | 37 | 6             | 7.5                          | 6                                    | 7                       | 6               |                                            |
| New models of primary care        | 10                                                            |   | 6  | 2 | 7 | 9  |    |    |    | 34 | 7             | 6.9                          | 7                                    | 5                       | 7               |                                            |



|                                                        |   |    |   |    |   |   |    |    |           |           |            |           |          |           |
|--------------------------------------------------------|---|----|---|----|---|---|----|----|-----------|-----------|------------|-----------|----------|-----------|
| Improving continuity, coordination                     | 6 | 5  | 9 | 7  | 2 | 4 | 33 | 8  | 6.7       | 8         | 6          | 8         |          |           |
| Challenges in small towns/cities                       | 2 | 5  | 7 |    | 5 | 9 | 2  | 30 | 9         | 6.1       | 9          | 6         | 9        |           |
| Improve, strengthen patient-<br>provider communication | 4 |    | 2 | 7  |   | 2 | 8  | 4  | <b>27</b> | <b>10</b> | <b>5.5</b> | <b>10</b> | <b>6</b> | <b>10</b> |
| Informing, empowering patients                         |   |    |   | 1  | 6 | 4 | 9  | 7  | <b>27</b> | <b>10</b> | <b>5.5</b> | <b>10</b> | <b>5</b> |           |
| Prevention/early intervention                          | 3 |    |   | 9  |   | 5 |    |    | 17        |           |            |           | 3        |           |
| Inadequacy of compensation model                       | 3 | 10 |   | 3  |   |   |    | 1  | 17        |           |            |           | 4        |           |
| No universal drug plan                                 |   |    |   | 10 | 4 |   |    | 3  | 17        |           |            |           | 3        |           |
| Resources to better manage health                      | 9 |    |   |    |   | 6 |    |    | 15        |           |            |           | 2        |           |
| Knowledge gaps in clinical evidence                    | 6 |    |   | 1  |   |   | 1  |    | 8         |           |            |           | 3        |           |
| Access to specialist knowledge                         |   |    |   | 5  |   |   | 1  |    | 6         |           |            |           | 2        |           |
| Addressing stigma and bias                             | 1 | 2  |   |    |   | 3 |    |    | 6         |           |            |           | 3        |           |

EMR = electronic medical record. Bold values indicate topics with ties.

<sup>1</sup> Topic headings have been shortened here for presentation ease. Refer to Supplementary file 2, column 2 for full topic headings.

<sup>2</sup> Ranked scores have been reverse scored, where 1=Least important and 10=Most important.

<sup>3</sup> Relative importance = [(topic score) / (maximum points for the group; i.e., number of patients (9) x 55 points) x 100].

## Standards for Reporting Qualitative Research (SRQR)\*

<http://www.equator-network.org/reporting-guidelines/srqr/>

Page/line no(s).

### Title and abstract

|                                                                                                                                                                                                                                                              |     |
|--------------------------------------------------------------------------------------------------------------------------------------------------------------------------------------------------------------------------------------------------------------|-----|
| <p><b>Title</b> - Concise description of the nature and topic of the study Identifying the study as qualitative or indicating the approach (e.g., ethnography, grounded theory) or data collection methods (e.g., interview, focus group) is recommended</p> | 1   |
| <p><b>Abstract</b> - Summary of key elements of the study using the abstract format of the intended publication; typically includes background, purpose, methods, results, and conclusions</p>                                                               | 3-4 |

### Introduction

|                                                                                                                                                                     |     |
|---------------------------------------------------------------------------------------------------------------------------------------------------------------------|-----|
| <p><b>Problem formulation</b> - Description and significance of the problem/phenomenon studied; review of relevant theory and empirical work; problem statement</p> | 6-8 |
| <p><b>Purpose or research question</b> - Purpose of the study and specific objectives or questions</p>                                                              | 7-8 |

### Methods

|                                                                                                                                                                                                                                                                                                                                                                                                             |              |
|-------------------------------------------------------------------------------------------------------------------------------------------------------------------------------------------------------------------------------------------------------------------------------------------------------------------------------------------------------------------------------------------------------------|--------------|
| <p><b>Qualitative approach and research paradigm</b> - Qualitative approach (e.g., ethnography, grounded theory, case study, phenomenology, narrative research) and guiding theory if appropriate; identifying the research paradigm (e.g., postpositivist, constructivist/ interpretivist) is also recommended; rationale**</p>                                                                            | 11-13        |
| <p><b>Researcher characteristics and reflexivity</b> - Researchers' characteristics that may influence the research, including personal attributes, qualifications/experience, relationship with participants, assumptions, and/or presuppositions; potential or actual interaction between researchers' characteristics and the research questions, approach, methods, results, and/or transferability</p> | 11-12        |
| <p><b>Context</b> - Setting/site and salient contextual factors; rationale**</p>                                                                                                                                                                                                                                                                                                                            | 11-13        |
| <p><b>Sampling strategy</b> - How and why research participants, documents, or events were selected; criteria for deciding when no further sampling was necessary (e.g., sampling saturation); rationale**</p>                                                                                                                                                                                              | 9, 18        |
| <p><b>Ethical issues pertaining to human subjects</b> - Documentation of approval by an appropriate ethics review board and participant consent, or explanation for lack thereof; other confidentiality and data security issues</p>                                                                                                                                                                        | 32           |
| <p><b>Data collection methods</b> - Types of data collected; details of data collection procedures including (as appropriate) start and stop dates of data collection and analysis, iterative process, triangulation of sources/methods, and modification of procedures in response to evolving study findings; rationale**</p>                                                                             | 11-14, 21-22 |

|                       |                                                                                                                                                                                                                                                       |              |
|-----------------------|-------------------------------------------------------------------------------------------------------------------------------------------------------------------------------------------------------------------------------------------------------|--------------|
| 1<br>2<br>3<br>4<br>5 | <b>Data collection instruments and technologies</b> - Description of instruments (e.g., interview guides, questionnaires) and devices (e.g., audio recorders) used for data collection; if/how the instrument(s) changed over the course of the study | 11-14        |
| 6<br>7<br>8           | <b>Units of study</b> - Number and relevant characteristics of participants, documents, or events included in the study; level of participation (could be reported in results)                                                                        | 18-21        |
| 9<br>10<br>11<br>12   | <b>Data processing</b> - Methods for processing data prior to and during analysis, including transcription, data entry, data management and security, verification of data integrity, data coding, and anonymization/de-identification of excerpts    | 11-14, 21-22 |
| 13<br>14<br>15<br>16  | <b>Data analysis</b> - Process by which inferences, themes, etc., were identified and developed, including the researchers involved in data analysis; usually references a specific paradigm or approach; rationale**                                 | 11-14        |
| 17<br>18<br>19<br>20  | <b>Techniques to enhance trustworthiness</b> - Techniques to enhance trustworthiness and credibility of data analysis (e.g., member checking, audit trail, triangulation); rationale**                                                                | 12-13        |

### Results/findings

|                      |                                                                                                                                                                                                   |             |
|----------------------|---------------------------------------------------------------------------------------------------------------------------------------------------------------------------------------------------|-------------|
| 23<br>24<br>25<br>26 | <b>Synthesis and interpretation</b> - Main findings (e.g., interpretations, inferences, and themes); might include development of a theory or model, or integration with prior research or theory | N/A         |
| 27<br>28<br>29       | <b>Links to empirical data</b> - Evidence (e.g., quotes, field notes, text excerpts, photographs) to substantiate analytic findings                                                               | Supp File 2 |

### Discussion

|                                  |                                                                                                                                                                                                                                                                                                                                                                                                             |       |
|----------------------------------|-------------------------------------------------------------------------------------------------------------------------------------------------------------------------------------------------------------------------------------------------------------------------------------------------------------------------------------------------------------------------------------------------------------|-------|
| 32<br>33<br>34<br>35<br>36<br>37 | <b>Integration with prior work, implications, transferability, and contribution(s) to the field</b> - Short summary of main findings; explanation of how findings and conclusions connect to, support, elaborate on, or challenge conclusions of earlier scholarship; discussion of scope of application/generalizability; identification of unique contribution(s) to scholarship in a discipline or field | 26-29 |
| 38<br>39                         | <b>Limitations</b> - Trustworthiness and limitations of findings                                                                                                                                                                                                                                                                                                                                            | 29    |

### Other

|                |                                                                                                                                               |              |
|----------------|-----------------------------------------------------------------------------------------------------------------------------------------------|--------------|
| 42<br>43<br>44 | <b>Conflicts of interest</b> - Potential sources of influence or perceived influence on study conduct and conclusions; how these were managed | 13-14, 27-28 |
| 45<br>46       | <b>Funding</b> - Sources of funding and other support; role of funders in data collection, interpretation, and reporting                      | 31           |

\*The authors created the SRQR by searching the literature to identify guidelines, reporting standards, and critical appraisal criteria for qualitative research; reviewing the reference lists of retrieved sources; and contacting experts to gain feedback. The SRQR aims to improve the transparency of all aspects of qualitative research by providing clear standards for reporting qualitative research.

1  
2  
3  
4  
5  
6  
7  
8  
9  
10  
11  
12  
13  
14  
15  
16  
17  
18  
19  
20  
21  
22  
23  
24  
25  
26  
27  
28  
29  
30  
31  
32  
33  
34  
35  
36  
37  
38  
39  
40  
41  
42  
43  
44  
45  
46  
47  
48  
49  
50  
51  
52  
53  
54  
55  
56  
57  
58  
59  
60

\*\*The rationale should briefly discuss the justification for choosing that theory, approach, method, or technique rather than other options available, the assumptions and limitations implicit in those choices, and how those choices influence study conclusions and transferability. As appropriate, the rationale for several items might be discussed together.

**Reference:**  
O'Brien BC, Harris IB, Beckman TJ, Reed DA, Cook DA. **Standards for reporting qualitative research: a synthesis of recommendations.** *Academic Medicine*, Vol. 89, No. 9 / Sept 2014  
DOI: 10.1097/ACM.0000000000000388

For peer review only

# BMJ Open

## What matters most to patients about primary health care: Mixed methods patient priority setting exercises within the PREFeR (PRioritiEs For Research) Project

|                                 |                                                                                                                                                                                                                                                                                                                                                                                                                                                                                                                                                                                                |
|---------------------------------|------------------------------------------------------------------------------------------------------------------------------------------------------------------------------------------------------------------------------------------------------------------------------------------------------------------------------------------------------------------------------------------------------------------------------------------------------------------------------------------------------------------------------------------------------------------------------------------------|
| Journal:                        | <i>BMJ Open</i>                                                                                                                                                                                                                                                                                                                                                                                                                                                                                                                                                                                |
| Manuscript ID                   | bmjopen-2018-025954.R2                                                                                                                                                                                                                                                                                                                                                                                                                                                                                                                                                                         |
| Article Type:                   | Research                                                                                                                                                                                                                                                                                                                                                                                                                                                                                                                                                                                       |
| Date Submitted by the Author:   | 05-Apr-2019                                                                                                                                                                                                                                                                                                                                                                                                                                                                                                                                                                                    |
| Complete List of Authors:       | Edwards, Louisa; Simon Fraser University, Faculty of Health Sciences; Centre for Clinical Epidemiology and Evaluation<br>Monro, Melody; Fraser Health Authority<br>Butterfield, Yaron; BC Primary Health Care Research Network Patient Advisory<br>Johl, Ravin; BC Primary Health Care Research Network Patient Advisory<br>Loftsgard, Kent; BC Primary Health Care Research Network Patient Advisory<br>Pelletier, Hayley; BC Primary Health Care Research Network Patient Advisory<br>McGavin, Colleen; BC SUPPORT Unit<br>Lavergne, M.; Simon Fraser University, Faculty of Health Sciences |
| <b>Primary Subject Heading</b>: | General practice / Family practice                                                                                                                                                                                                                                                                                                                                                                                                                                                                                                                                                             |
| Secondary Subject Heading:      | Research methods                                                                                                                                                                                                                                                                                                                                                                                                                                                                                                                                                                               |
| Keywords:                       | patient engagement, priority setting, primary health care, Dialogue Model                                                                                                                                                                                                                                                                                                                                                                                                                                                                                                                      |
|                                 |                                                                                                                                                                                                                                                                                                                                                                                                                                                                                                                                                                                                |

SCHOLARONE™  
Manuscripts

1  
2  
3  
4  
5  
6  
7  
8  
9  
10  
11  
12  
13  
14  
15  
16  
17  
18  
19  
20  
21  
22  
23  
24  
25  
26  
27  
28  
29  
30  
31  
32  
33  
34  
35  
36  
37  
38  
39  
40  
41  
42  
43  
44  
45  
46  
47  
48  
49  
50  
51  
52  
53  
54  
55  
56  
57  
58  
59  
60

# What matters most to patients about primary health care: Mixed methods patient priority setting exercises within the PREFeR (PRioritiEs For Research) Project

Louisa Edwards<sup>1,2</sup>, Melody Monro<sup>3</sup>, Yaron Butterfield<sup>4</sup>, Ravin Johl<sup>4</sup>, Kent Cadogan Loftsgard<sup>4</sup>, Hayley Pelletier<sup>4</sup>, Colleen McGavin<sup>5</sup>, M. Ruth Lavergne<sup>1</sup>

**Corresponding author:**

M. Ruth Lavergne

Simon Fraser University

Faculty of Health Sciences

8888 University Drive

Blusson Hall, Room 10502

Burnaby, British Columbia

V5A 1S6

Phone: +1-778-782-3937 | Email: [ruth\\_lavergne@sfu.ca](mailto:ruth_lavergne@sfu.ca)

1  
2  
3 **Author affiliations:**  
4  
5

6 <sup>1</sup> Faculty of Health Sciences, Simon Fraser University, Burnaby, Canada  
7

8  
9 <sup>2</sup> Centre for Clinical Epidemiology and Evaluation, Vancouver Coastal Health Research Institute,  
10  
11  
12 Vancouver, British Columbia, Canada  
13

14  
15 <sup>3</sup> Fraser Health Authority, Surrey, Canada  
16

17  
18 <sup>4</sup> BC Primary Health Care Research Network Patient Advisory, Vancouver, Canada  
19

20  
21 <sup>5</sup> BC SUPPORT Unit, Vancouver, Canada  
22  
23  
24  
25  
26

27 **Word count: 5269**  
28  
29  
30  
31  
32  
33  
34  
35  
36  
37  
38  
39  
40  
41  
42  
43  
44  
45  
46  
47  
48  
49  
50  
51  
52  
53  
54  
55  
56  
57  
58  
59  
60

## Abstract

**Objectives:** To identify patient-generated priority topics for future primary care research in British Columbia (BC), Canada within a diverse patient population.

**Design:** Mixed methods priority setting exercises framed by the Dialogue Model, using the Nominal Group Technique (rank-ordered scoring), and province-wide online surveys capturing importance ratings of the top 10 primary health care topics from patients and primary care providers.

**Setting:** BC, Canada

**Participants:** Topic identification was completed by 10 patient partners (7 female, 3 male) from the BC Primary Health Care Research Network Patient Advisory; online surveys were completed by 464 patients and 173 primary care providers.

**Results:** The 10 members recruited to the Patient Advisory provided over 80 experiences of what stood out for them in BC primary care, which were grouped thematically into 18 topics, 10 of which were retained in province-wide surveys. Top-rated survey topics for both patients (n=464) and providers (n=173) included being unable to find a regular family doctor/other primary health care provider, support for living with chronic conditions, mental health resources, and information sharing, including electronic medical records. However, all 10 topics were rated important, on average, by both groups.



1  
2  
3  
4 **Conclusions:** The current project activities demonstrate the feasibility of including patients in  
5  
6  
7 priority setting exercises for primary health care in general, rather than focusing on a condition-  
8  
9 specific population or disease area. There was considerable overlap between patient-generated  
10  
11 topics and topics previously identified by other stakeholders, but patients identified two  
12  
13 additional topics (Mental health resources, Improve and strengthen patient-provider  
14  
15 communication). More similarities than differences in topic importance between patients and  
16  
17 providers emerged in the online surveys. The project activities that follow (rapid literature  
18  
19 reviews, multi-stakeholder dialogue) will highlight under-researched topics and inform the  
20  
21 development of specific research questions.  
22  
23  
24  
25  
26  
27  
28

29 **Keywords:** patient engagement, priority setting, primary health care, Dialogue Model  
30  
31  
32  
33  
34  
35  
36  
37  
38  
39  
40  
41  
42  
43  
44  
45  
46  
47  
48  
49  
50  
51  
52  
53  
54  
55  
56  
57  
58  
59  
60

## ARTICLE SUMMARY

### Strengths and limitations of this study

- This is the only published patient priority setting project that we are aware of that addresses primary health care topics in general, rather than focusing on a particular health condition or issue.
- The project was informed by the Dialogue Model, which is a multi-stage, multi-stakeholder structured priority setting framework, but explicitly focused on patient perspectives within the Exploration and Consultation Phases of primary health care topic generation.
- Patients identified new topics and added depth to topics previously identified in similar exercises among policymakers or researchers, further highlighting the importance of patient engagement in priority setting.
- Generalizability of the current priority topics might be limited, given the characteristics of the Patient Advisory (e.g., well educated, previous experience with research) and survey respondents (e.g., predominantly female, White).

## INTRODUCTION

Primary care is the first point of contact with health care for most patients, and supports a wide variety of health needs. It is not surprising, therefore, that a host of primary care research focuses on studying patient needs and gaps in care. However, patients are not frequently included in prioritizing research ideas[1–3]. At a basic level, this is problematic because patient, clinician, and researcher priorities may differ significantly[4]. At an applied level, intervention uptake and, consequently, any impact on health outcomes may suffer if the problems studied and outcomes suggested have not considered patients' perspectives, leading to research 'waste'[5]. Patient prioritization of topics for research ultimately benefits the intended end-users of primary health care directly – patients themselves – and makes better use of scarce resources.

There is growing recognition of the importance of involving patients in research priority setting. In response, there has been a proliferation of patient priority setting studies in recent years, with 70 articles from the UK, US, Canada, the Netherlands and Australia identified between 2007-2017 in a rapid systematic review of public and patient engagement in prioritization[6]. Yet, most processes for engaging patients in research have focused on populations defined by a specific condition[6,7], rather than primary care more generally. While there have been exercises to identify primary care research priorities at clinical and academic conferences[8], these did not include patients. We have only identified a few recent publications that examined primary care priorities more generally – i.e., in which the overall focus was not specific to a particular health condition – and that involved patients as one of the multi-stakeholder

1  
2  
3 groups[9–12]. Even so, these studies actually targeted more specific topics – how to promote  
4  
5 healthy behaviours through primary care, ensuring care is guided by patient goals and  
6  
7 preferences, and patient safety concerns – rather than allowing any topics relating to primary  
8  
9 care experiences to emerge as priorities. In order to examine gaps in care that affect a large and  
10  
11 diverse range of patients, it is important to enable patients to voice whatever primary health  
12  
13 care priorities are most pressing for them.  
14  
15  
16

17  
18 There are a host of tools and techniques for priority setting. One recent methodological review  
19  
20 found roughly equal numbers of studies that used published, structured frameworks and those  
21  
22 that used newly-developed tools (e.g., surveys specific to the project)[13]. In terms of  
23  
24 structured approaches, there are several multi-stage priority setting frameworks, such as the  
25  
26 James Lind Alliance Priority Setting Partnerships[14] and the Dialogue Model[1,15]. The James  
27  
28 Lind Alliance has developed important principles to guide priority setting for research with  
29  
30 patients and caregivers [16], but this approach is anchored on treatment uncertainties and does  
31  
32 not translate directly to questions related to primary care more generally. There does not  
33  
34 appear to be a single, best method[17], nor is there clear agreement on whether using a  
35  
36 combination of tools for priority setting is superior to using one technique alone[13]. However,  
37  
38 use of a clearly defined approach is recommended[13,18], and the choice of which method(s)  
39  
40 may be best guided by the research question[17]. The Cochrane Priority Setting Methods Group  
41  
42 noted that researchers may adapt and implement the same methods in different ways  
43  
44 depending on the context and research focus[19].  
45  
46  
47  
48  
49  
50  
51  
52

53 Recognizing that patient engagement early in the research process is important, but has been  
54  
55 largely absent from priority setting exercises in primary care, the main aim of the PREFeR  
56  
57  
58  
59

1  
2  
3 (PRioritiEs For Research) Project was to identify patient-generated priorities for primary care  
4  
5 research in British Columbia (BC), Canada. This is consistent with Canada's Strategy for Patient  
6  
7 Oriented Research, which supports research that engages patients as partners, focuses on  
8  
9 patient-identified priorities and improves patient outcomes[20]. This decision was also shaped  
10  
11 by the fact that research priorities for primary care had recently been identified in BC, but this  
12  
13 process included policymakers, clinicians, and researchers, and not patients[21]. By focusing on  
14  
15 topics that are of importance to patients, research is more likely to have positive impacts on  
16  
17 policy and practice.  
18  
19  
20  
21  
22

23 As noted in reviews[6,22], detail about methodology is often lacking in articles about priority  
24  
25 setting, and this is essential to replicating approaches and understanding how and what works  
26  
27 for patient engagement. The PReFeR Project was informed by the Dialogue Model, which is a  
28  
29 multi-stage priority setting framework involving multiple stakeholders, but modified this model  
30  
31 to focus solely on patient perspectives for initial topic generation[1]. Here we report the  
32  
33 resulting patient-identified priorities and their importance for patients and primary care  
34  
35 providers. We also overview the other project activities that are couched within the later  
36  
37 phases of the Dialogue Model, which correspond to the secondary aims of PReFeR: to assess  
38  
39 whether research is already being conducted on the patient priorities through rapid literature  
40  
41 reviews and 'horizon scanning' surveys with BC researchers, and to explore where and why  
42  
43 differences might occur in the survey results through a facilitated discussion ('dialogue') with  
44  
45 patients, providers, researchers and policymakers. Taken together, results from these activities  
46  
47  
48  
49  
50  
51  
52  
53 are key considerations for setting future research questions.  
54  
55  
56  
57  
58  
59  
60

## METHODS

### Patient and public involvement

The BC Primary Health Care Research Network (BC-PHCRN) Patient Advisory (hereafter, referred to as the Patient Advisory) was formed to conduct this priority setting exercise, as well as gather their input into multiple studies supported by the BC-PHCRN. Patients living throughout BC were recruited to the Patient Advisory through expression of interest calls posted by the BC-PHCRN, through Patient Voices Network (a network of patients and caregivers interested in engagement opportunities with health care partners in British Columbia), and through a patient engagement workshop at the Centre for Health Services and Policy Research annual conference (Vancouver, BC, March 2017). We included the following text in the invitation: "Priority will be given to ensuring that patient partners are inclusive of the diverse communities and individuals who access primary health care services. Please let us know if and how your participation might add to diversity." We used this information to purposively recruit patients, aiming to maximize diversity with respect to health care needs, health authority, ethnicity (including First Nations), age, and gender. We also sought to include both patients with and without previous research experience. As is consistent with Canada's Strategy for Patient Oriented Research[20], the Patient Advisory members were research partners in PReFeR. They contributed to planning and shaping research activities other than priority setting, since they provided input as participants to the priority setting phase of this project, as described below.

## Overview of the Dialogue Model

Compared to the other structured priority setting frameworks, the five phases of the Dialogue Model – Exploration, Consultation, Prioritization, Integration, and Programming and Integration[1,15] – mapped most closely on to the overarching ethos of PREFeR (Figure 1). In particular, the Dialogue Model is based on participatory and interactive approaches, which advocate an equal partnership between patients and other stakeholders[1]. Through processes that encourage mutual learning, the Dialogue Model can lead to co-ownership of the priorities identified[1]. The model uses a variety of mixed methods (e.g., literature reviews, interviews, surveys) throughout the five phases, which we also identified as essential to the aims of PREFeR. Commonly, these methods are grounded in other structured techniques. For example, focus groups may be framed within the Nominal Group Technique (NGT)[23], which is a widely-used method of idea generation, based on four key stages: individual and silent idea generation in response to the nominal question, round-robin feedback to the group (i.e., each person sequentially shares one idea at a time), group discussion and clarification of ideas, individual voting (ranking or rating of ideas)[24].

The five phases of the Dialogue Model were modified to match the aims of PREFeR. Most notably, we chiefly focused on patient views in the Consultation phase, since the goal of PREFeR was to generate patient priorities. However, priorities from our other stakeholders were gathered and compared to patient priorities later in the project. Below, we overview all activities in PREFeR as they map on to the phases of the Dialogue Model, but the primary focus of this paper is on the Exploration, Consultation, and Prioritization phases. Research activities in

1  
2  
3 these phases correspond to use of NGT to generate and prioritize patient-generated primary  
4 care topics, and province-wide online surveys to rate the importance of the top 10 patient-  
5 ranked topics amongst a wider group of patients and primary care providers.  
6  
7  
8  
9

## 10 11 **Data collection**

### 12 13 14 15 **Exploration phase (part 1)**

#### 16 17 18 19 *Brainstorming primary care experiences*

20  
21 In the first activity of the project (within the Exploration phase), the ten-member Patient  
22 Advisory was sent an email request to brainstorm their ideas in response to the following  
23 question, “Based on your experiences of primary care, what things really stand out for you?”  
24  
25 Primary care was defined as where most people go first for medical help and advice when they  
26 have a health problem, and provided by health care professionals, like family doctors, nurses or  
27 nurse practitioners, pharmacists or emergency services staff. The question was neutrally  
28 framed by design, such that either positive or negative experiences of primary care might  
29 emerge. Patient Advisory members were asked to spend about 10 minutes on the task and  
30 write down as many things that came to mind in response to this question. They were invited to  
31 a teleconference to share their ideas with the group approximately two weeks later. For those  
32 unable to attend, an opportunity to provide their thoughts through individual telephone calls  
33 with the first author prior to the scheduled teleconference was offered. With permission, these  
34 members’ primary care experiences were shared with the rest of the Patient Advisory during  
35 the group teleconference.  
36  
37  
38  
39  
40  
41  
42  
43  
44  
45  
46  
47  
48  
49  
50  
51  
52  
53  
54  
55  
56  
57  
58  
59  
60



1  
2  
3 The teleconference was led by the first author and facilitated by the second author. The first  
4  
5 author has a PhD in psychology and over eight years' experience working within large, multi-  
6  
7 stakeholder primary care research teams that all included patient and public involvement  
8  
9 members. She joined the research team after the Patient Advisory had been recruited, did not  
10  
11 know any of the members prior to working on the project, and the teleconference was her first  
12  
13 interaction with the Patient Advisory. The first and second author worked together to ensure  
14  
15 equal opportunity of patient voices throughout the teleconference.  
16  
17  
18  
19  
20

21 Using the Nominal Group Technique[23] implemented with a teleconference platform[25], each  
22  
23 Patient Advisory member was asked to provide one idea at a time, in round-robin fashion, until  
24  
25 there were no more new ideas to share. In line with NGT, patients were asked to first briefly  
26  
27 describe the ideas that they had in response to the question, "what things really stand out for  
28  
29 you in primary care?" Further explanation and discussion by the entire group followed after all  
30  
31 ideas had been listed. The principal investigator (RL) took detailed notes throughout the  
32  
33 teleconference, which were emailed to the Patient Advisory the following day for their review.  
34  
35  
36  
37  
38 No identifiers were used in the notes, since the aim was to record the raw list of ideas from the  
39  
40 entire group.  
41  
42  
43

44 Based on the teleconference notes, the first author consolidated the raw list of brainstormed  
45  
46 ideas. Common elements were grouped thematically into topics. A heading for each topic was  
47  
48 constructed with a short phrase in lay language to reflect the underlying theme of the collection  
49  
50 of examples and experiences raised by the patients. The specific patient examples and  
51  
52 experiences were additionally provided in bullet form below each topic heading. After an initial  
53  
54 discussion with the second and last author, the topic list was refined and then emailed to the  
55  
56  
57  
58  
59  
60

1  
2  
3 Patient Advisory. The Patient Advisory was asked to review the list of topics ahead of an in-  
4  
5 person priority setting workshop, to ensure it reflected the teleconference discussion  
6  
7 accurately.  
8  
9

## 10 Consultation and (Interim) Prioritization phases

### 11 *Interim priority setting workshop*

12  
13  
14  
15  
16  
17 Three and a half weeks after the teleconference, a full-day, in-person priority setting workshop  
18  
19 with the Patient Advisory was held in Vancouver, BC. The purpose of the workshop was, firstly,  
20  
21 to review, discuss, revise, and agree on the list of the patient-generated primary care topics  
22  
23 that emerged out of the teleconference (Consultation phase), and then to have the patients  
24  
25 individually rank the top 10 most important topics ((Interim) Prioritization phase). Similar to the  
26  
27 methods used by Broerse and colleagues [13], we decided in advance that 10 topics would be a  
28  
29 manageable number to carry forward for patients and primary care providers to rate in an  
30  
31 online survey. Collectively, this constituted the remaining steps of the NGT process, which  
32  
33 followed from the initial stages conducted during the teleconference.  
34  
35  
36  
37  
38  
39

40 To arrive at a final, agreed upon list of primary care topics, the Patient Advisory was asked to  
41  
42 review the topics and consider: (1) the suitability of the topic label wording, (2) whether any  
43  
44 topics were missed from the teleconference or new ideas had emerged since that discussion,  
45  
46 and (3) whether any additional topics should be separated out from the patient examples  
47  
48 and/or whether two or more topics could be grouped together. These points were discussed for  
49  
50 each topic in turn, making revisions on a projected screen in real time during the workshop.  
51  
52  
53  
54  
55  
56  
57  
58  
59  
60

1  
2  
3 Once the list of primary care topics was finalized, the group moved on to the second task of the  
4 workshop – ranking the topics in terms of their importance. The final topic list was distributed  
5  
6 to the Patient Advisory, who were then asked to privately choose the 10 topics that were most  
7  
8 important to them personally. Personal importance could also include thinking about how the  
9  
10 issues might affect other people they were close to (e.g., family, friends). A recording sheet was  
11  
12 provided for patients to arrange their top 10 topics in terms of 1=*Most important* to 10=*Least*  
13  
14 *important*. Ties were not permitted. In line with NGT methods, patients were asked to  
15  
16 complete this task silently and on their own, and they were given as much time as needed. The  
17  
18 first author checked the ranking sheets for completeness as they were collected.  
19  
20  
21  
22  
23  
24  
25

26 The first author entered the patient-ranked data into an Excel spreadsheet, and then reverse  
27  
28 scored the data, such that 10=*Most important* and 1=*Least important*. Following the steps  
29  
30 outlined in McMillan et al.[24], results were pooled by first creating a sum of scores for each  
31  
32 topic, which indicated its ranked priority or strength of vote score[26], and then calculating the  
33  
34 proportion (%) of scores ranked within the top 10 topics, which indicated relative importance  
35  
36 [27]. In order to resolve ties, a third method of tabulating the ranks involved counting the  
37  
38 number of times each topic was ranked within the top 10 across patients, which is an indication  
39  
40 of topic popularity[24,26]. The data were then sorted according to their ranked priority, yielding  
41  
42 the top 10 topics that the project would carry forward in the remaining project activities.  
43  
44  
45  
46  
47  
48

#### 49 *Exploration phase (part 2) - Rapid literature reviews*

50  
51 Rapid literature reviews were carried out for English language publications from 2008-2018,  
52  
53 reporting research conducted within BC and Canada on each of the 10 patient-identified  
54  
55 primary care topics. This information was used to inform the Integration phase and future  
56  
57  
58  
59  
60

1  
2  
3 development of research questions, but we do not report results herein. This reflects a  
4  
5 divergence from the Dialogue Model, in which we carried out rapid literature reviews after the  
6  
7 Consultation phase, instead of within the Exploration phase. This modification was made to  
8  
9 provide input to contextualize what research had already been conducted within Canada.  
10  
11 Within the Dialogue Model, literature reviews may be undertaken for scoping purposes, and to  
12  
13 directly shape subsequent activities within the model, such as we chose to do.  
14  
15  
16  
17

## 18 19 **Prioritization phase**

### 20 21 22 *Topic importance surveys*

23  
24 Online surveys were administered province-wide to capture BC patients' and primary care  
25  
26 providers' importance ratings of the top 10 topics. Both stakeholder groups were asked to rate  
27  
28 each topic individually from 1=*Not at all important* to 5=*Very important*. The topic heading,  
29  
30 along with 2-4 bullet points of examples and experiences (from the Patient Advisory) to  
31  
32 illustrate the topic, were included to mitigate misunderstanding and misinterpretation of the  
33  
34 topic heading. Participants were asked to *rate* rather than *rank* the identified topics, so that we  
35  
36 could understand which topics were closely clustered with respect to importance, and not just  
37  
38 overall rank order. A freetext box was provided for any comments respondents wished to  
39  
40 submit. Following the importance ratings, several socio-demographic questions were included  
41  
42 in the surveys (Supplementary file 1). Completion of the online survey implied consent, which  
43  
44 was outlined on the information landing page for the survey.  
45  
46  
47  
48  
49  
50  
51  
52  
53  
54  
55  
56  
57  
58  
59  
60

### Survey participants and recruitment

We recruited survey respondents using multiple online dissemination channels, such as social media (Twitter, Facebook), e-newsletters, emails, snowballing and notices posted on several websites. We also included a one-time classified ad in 31 local newspapers in small BC communities and offered telephone completion as an alternative to the online survey. Due to time and budget constraints, the surveys were only provided in English. The sole inclusion criterion was that patients and providers must be living in BC to complete the survey.

### Analysis of survey data

We report means and standard deviations of importance ratings among patients and providers. Future analyses will explore differences in the ratings by patient and provider characteristics.

### *Horizon scanning survey*

A third survey with BC researchers was included for horizon scanning purposes; namely, to capture any past, ongoing, or upcoming (in the next 12 months) research on the 10 primary care topics. This complements the rapid literature reviews, but it also enabled us to capture research that had not been published, completed or for which funding has recently been secured. As with the literature reviews, this information was used to inform the Integration phase and future development of research questions, but we do not report results herein.

### Integration phase

#### *Patient, provider, researcher and policymaker dialogue event*

A final dialogue event brought patients and primary care providers together to share the survey results, and to engage in a facilitated discussion about areas of concordance and dissimilarity in

1  
2  
3 the results. Patients included the Patient Advisory and others recruited to enhance the  
4  
5 representativeness of minority populations (e.g., Indigenous peoples and newcomers to the  
6  
7 province). We recruited a diverse mix of primary care providers, including GPs, nurses, nurse  
8  
9 practitioners, and pharmacists.  
10  
11

12  
13  
14 The aim of the event was to gain a better qualitative understanding of the general perspectives  
15  
16 of patients and primary care providers with respect to the quantitative survey results, rather  
17  
18 than to achieve consensus on the top primary care topics for the two stakeholder groups, as in  
19  
20 the Dialogue Model. We think it is more imperative to understand where and how patient and  
21  
22 provider perspectives might differ, rather than try to bring the views of a small subgroup of  
23  
24 patients and primary care providers together.  
25  
26

27  
28  
29 A parallel discussion was additionally held with researchers and policymakers at the dialogue  
30  
31 event. These stakeholders also discussed the survey findings, but the focus was on how these  
32  
33 results might be translated into future research and their policy implications. Findings from this  
34  
35 event will be reported elsewhere.  
36  
37

## 38 39 40 **RESULTS**

### 41 42 43 **Patient Advisory characteristics**

44  
45  
46 In total, 11 members (8 female, 3 male) were recruited to the Patient Advisory between March  
47  
48 and May 2017. Of these, 10 were recruited through recruitment advertisements placed with  
49  
50 Patient Voices Network BC. A total of 3 males and 12 females replied to these ads, and we  
51  
52 chose 3 males and 7 females. An eighth female member was recruited from another study to  
53  
54  
55  
56  
57  
58  
59  
60

1  
2  
3 ensure equal representation across the five regional health authorities in the province.  
4  
5 However, one female patient resigned at the start of the PREFeR Project and did not provide  
6  
7 any input to the project. The final 10 Patient Advisory members (7 female, 3 male) were  
8  
9 characterized by a mix of socio-demographic characteristics, including ethnic minority  
10  
11 backgrounds, speaking multiple languages, born outside of Canada or the province, and  
12  
13 representation from all five health authorities (Table 1). In line with the recruitment strategy,  
14  
15 patients included people with both visible/congenital (one member) and invisible disabilities,  
16  
17 experiences of long-standing chronic illness (including mental health disorders, chronic  
18  
19 infectious disease, chronic pain). Some had recovered from very severe, life-threatening health  
20  
21 conditions (e.g., cancer), while others had only minor needs for episodic care. The group were  
22  
23 predominantly employed (7/10, 70%), well educated (BSc, BA, teacher's college or higher  
24  
25 university degree: 6/9, 67%), and were considered 'experienced' (e.g., members of three or  
26  
27 more research committees/organizations, patient partners in other studies, research  
28  
29 participant involvement, etc.) in terms of previous research involvement (6/9, 67%). The group  
30  
31 did not know each other before joining the Patient Advisory, and the PREFeR project was the  
32  
33 first task the Advisory worked on collectively.  
34  
35  
36  
37  
38  
39  
40  
41  
42  
43  
44  
45  
46  
47  
48  
49  
50  
51  
52  
53  
54  
55  
56  
57  
58  
59  
60

**Table 1.** Characteristics of British Columbia Primary Health Care Research Network Patient

Advisory (n=10). All values reported are N(%), unless otherwise specified.

|                                                                                                       | N (%)       |
|-------------------------------------------------------------------------------------------------------|-------------|
| Age in years (M, SD) <sup>1</sup>                                                                     | 48.4 (13.9) |
| Age range in years                                                                                    | 24-67       |
| Sex                                                                                                   |             |
| Female                                                                                                | 7 (70)      |
| Male                                                                                                  | 3 (30)      |
| Ethnicity <sup>1</sup>                                                                                |             |
| White only                                                                                            | 3 (33)      |
| Indigenous                                                                                            | 2 (20)      |
| Any other background                                                                                  | 4 (40)      |
| Language(s) spoken <sup>1</sup>                                                                       |             |
| English only                                                                                          | 5 (56)      |
| Multiple languages                                                                                    | 4 (44)      |
| Employed                                                                                              |             |
| Yes                                                                                                   | 7 (70)      |
| No                                                                                                    | 3 (30)      |
| Highest education level <sup>1</sup>                                                                  |             |
| Trade or non-University certificate/diploma,<br>community college, University certificate<br>below BA | 3 (33)      |



|                                              |                                 |        |
|----------------------------------------------|---------------------------------|--------|
|                                              | BA, teacher's college or higher | 6 (67) |
| Country of birth <sup>1</sup>                |                                 |        |
|                                              | Canada                          | 8 (89) |
|                                              | Outside Canada                  | 1 (11) |
| Years living in BC <sup>1</sup>              |                                 |        |
|                                              | 0-5                             | 2 (22) |
|                                              | 6-15                            | 1 (11) |
|                                              | More than 15 years              | 6 (67) |
| Regional Health Authority <sup>2</sup>       |                                 |        |
|                                              | Vancouver Coastal Health        | 5 (50) |
|                                              | Vancouver Island Health         | 2 (20) |
|                                              | Fraser Health                   | 1 (10) |
|                                              | Interior Health                 | 1 (10) |
|                                              | Northern Health                 | 1 (10) |
| Previous research involvement <sup>1,3</sup> |                                 |        |
|                                              | None                            | 1 (11) |
|                                              | Moderate                        | 2 (22) |
|                                              | Experienced                     | 6 (67) |

---

<sup>1</sup> Data available for 9 of the 10 Patient Advisory members.

1  
2  
3  
4  
5  
6  
7  
8  
9  
10  
11  
12  
13  
14  
15  
16  
17  
18  
19  
20  
21  
22  
23  
24  
25  
26  
27  
28  
29  
30  
31  
32  
33  
34  
35  
36  
37  
38  
39  
40  
41  
42  
43  
44  
45  
46  
47  
48  
49  
50  
51  
52  
53  
54  
55  
56  
57  
58  
59  
60

<sup>2</sup> There are five regional Health Authorities in British Columbia.

<sup>3</sup> Moderate = 2-3 years of researcher/research participant experience and/or patient partner on >2 committees/studies; Experienced = >3 years of researcher/research participant experience and/or patient partner on >3 committees/studies.

For peer review only

## Brainstorming primary care experiences

Two (1 male, 1 female) Patient Advisory members were unable to attend the primary care experiences teleconference in September 2017, and so their ideas were shared via a telephone call with the first author in advance. In total, these and the remaining eight Patient Advisory members (2 male, 6 female) provided 82 experiences and examples of what stood out for them in primary care in BC. There was considerable overlap in these primary care experiences, which were initially grouped into 19 themes by LE, MM, and RL (Supplementary file 2 column 1).

## Interim priority setting workshop

Nine (2 male, 7 female) of the 10 Patient Advisory members attended the in-person priority setting workshop in Vancouver, Canada in September 2017. The researcher-proposed 19 primary care themes were reviewed, discussed, and revised (Supplementary file 2, column 2; topic headings and full set of illustrative bullet points are also provided in Supplementary file 2). No additional themes were added, but 14 of the topic headings were changed and two of the researcher-suggested topics (*Impact of a new diagnosis*, *Care of chronic conditions*) were combined to form a single patient-revised topic (*Support for living with chronic conditions*). In total, 18 final topics were retained from the first part of the workshop.

Patients selected and then ranked the 10 most important topics for themselves and in consideration of their social network. The raw rankings were followed by methods of tabulating the final ranked priority topics (via scores and votes), which included the sum of scores across patients, ranked priority via scores, relative importance, ranked priority via relative importance,

1  
2  
3 and the number of votes (Supplementary file 3). There were some tied ranks, which were  
4  
5 resolved by the number of votes. For example, *Accessing care when and where patients need it*  
6  
7 and *Support for living with chronic conditions* were tied for fourth place, but the access-related  
8  
9 topic received more votes overall, and so retained the higher priority position. There was  
10  
11 consensus within the team that the top 10 topics captured the most important ideas.  
12  
13  
14  
15

### 16 Survey participant characteristics

17  
18  
19 Between February and May 2018, 464 patients and 173 primary care providers living and  
20  
21 working in BC completed the survey. As shown in Table 2, the majority of both patients and  
22  
23 providers were female and of White ethnicity. The proportion of patient survey respondents  
24  
25 from the five regional health authorities was closely aligned with 2017 provincial population  
26  
27 estimates for Vancouver Coastal Health and Vancouver Island Health (provincial estimates:  
28  
29 24.6% and 16.5%, respectively), but there was over-representation from Interior and Northern  
30  
31 Health (provincial estimates: 15.7% and 5.8%, respectively) and under-representation from  
32  
33 Fraser Health (provincial estimate: 37.5%)[28].  
34  
35  
36  
37  
38

39 Primary care providers from Interior Health authority were over-represented, constituting over  
40  
41 half of all respondents. Providers were fairly evenly distributed between primary care  
42  
43 physicians, nurses, and all other providers such as pharmacists, physical and occupational  
44  
45 therapists, and social workers.  
46  
47  
48  
49  
50  
51  
52  
53  
54  
55  
56  
57  
58  
59  
60

**Table 2.** Characteristics of patients and primary care providers completing the online survey. All values reported are N(%).

|                                              | Patients (n=464) | Providers (n=173) |
|----------------------------------------------|------------------|-------------------|
| <b>Age</b>                                   |                  |                   |
| Under 40 years                               | 123 (26.5)       | -                 |
| 40-59 years                                  | 158 (34.0)       | -                 |
| 60+ years                                    | 152 (32.7)       | -                 |
| <b>Sex</b>                                   |                  |                   |
| Female                                       | 368 (79.3)       | 130 (75.6)        |
| Male                                         | 77 (16.6)        | 35 (20.4)         |
| <b>Ethnicity</b>                             |                  |                   |
| White only                                   | 366 (78.9)       | 130 (75.1)        |
| Mixed or any other background                | 74 (15.9)        | 22 (12.7)         |
| <b>Regional health authority<sup>2</sup></b> |                  |                   |
| Vancouver Coastal Health                     | 108 (23.3)       | 23 (13.3)         |
| Fraser Health                                | 97 (20.9)        | 19 (11.0)         |
| Vancouver Island Health                      | 70 (15.1)        | 16 (9.3)          |
| Interior Health                              | 129 (27.8)       | 99 (57.2)         |
| Northern Health                              | 47 (10.1)        | 5 (2.9)           |
| Provincial Health Services Authority         |                  | 9 (5.2)           |
| <b>Type of provider</b>                      |                  |                   |
| Family doctor                                | -                | 52 (30.1)         |

|                                             |   |           |
|---------------------------------------------|---|-----------|
| Nurse                                       | - | 52 (30.1) |
| Other primary care provider <sup>3</sup>    | - | 10 (5.8)  |
| Community-based/allied workers <sup>4</sup> | - | 38 (22.0) |
| Hospital-based only, including consultants  | - | 21 (12.1) |

<sup>1</sup> Figures do not always sum to 464 and 173 (100%), due to no response/system missing, 'prefer not to answer', 'don't know', or 'other' responses.

<sup>2</sup> There are five regional Health Authorities in British Columbia.

<sup>3</sup> Other primary care providers included pharmacists, midwives, or any other primary care provider other than family doctors and nurses.

<sup>4</sup> Community-based/allied workers included social workers, care aides, etc.

### Survey topic importance ratings

Comparing between patient and provider topic importance mean ratings, all 10 topics were rated highly by both groups (between 4="Important" and 5="Very important") (Table 3).

Among both patients and providers, the top-ranked topic was *Unable to find a regular family doctor or other primary health care provider*. Among patients, the next six topics (*Support for chronic conditions*, *Information sharing (including EMR)*, *Mental health resources*, *Access to care when/where needed*, *New models of healthcare*, and *Improve continuity/coordination*) were all similarly rated (means 4.41 to 4.52). The same six mid-ranked topics were similarly clustered for providers, although there was a wider range of average ratings (means 4.27 to 4.53). The final three lower-ranked topics were still equivalent to the "Important" category, on average.

Therefore, there were more similarities than differences between the rank ordering of topics for patients and providers.

**Table 3.** Mean (standard deviation) importance ratings of primary care topics listed in order of mean patient ratings

| Primary care topics                                                        | Patients (n=464) | Providers (n=173) |
|----------------------------------------------------------------------------|------------------|-------------------|
| 1) Unable to find regular family doctor/other primary health care provider | 4.64 (0.76)      | 4.59 (0.76)       |
| 2) Support for living with chronic conditions                              | 4.52 (0.75)      | 4.36 (0.88)       |
| 3) Information sharing, including EMR                                      | 4.52 (0.76)      | 4.29 (0.91)       |
| 4) Mental health resources                                                 | 4.51 (0.81)      | 4.53 (0.77)       |
| 5) Accessing care when and where patients need it                          | 4.46 (0.78)      | 4.27 (0.85)       |
| 6) New models of primary care that include other HCPs                      | 4.44 (0.83)      | 4.30 (1.03)       |
| 7) Improving continuity and coordination                                   | 4.41 (0.81)      | 4.31 (0.85)       |
| 8) Improve and strengthen patient-provider communication                   | 4.21 (0.92)      | 4.03 (1.05)       |
| 9) Challenges in small towns/cities and remote areas                       | 4.18 (0.99)      | 4.18 (0.92)       |
| 10) Care guided by patient needs, values, preferences, and priorities      | 4.09 (1.02)      | 3.95 (1.07)       |

EMR = electronic medical record; HCPs = health care professionals. The 10 topics were each rated on a scale from 1 (*Not at all important*) to 5 (*Very important*).

## DISCUSSION

Involving patients in setting priorities for primary care research is feasible, fruitful and important to patients, but it is rare. This paper outlines the key activities of the PREFeR Project, which are framed within the Dialogue Model, and reports the processes and results from the priority setting exercises. A group of 10 patients from all five regional health authorities in the province were recruited as patient partners to a Patient Advisory group. Using the Nominal Group Technique, over 80 experiences of what stood out for them in primary care were generated. After grouping these into 18 common themes, the top 10 ranked topics were retained for rating in a province-wide survey for patients and primary care providers. The most highly rated topics for both patients and providers were about being unable to find regular family doctor/other primary health care provider, support for living with chronic conditions, information sharing, including EMR, and mental health resources. In fact, the mean ratings and rank ordering of the topics were similar for both stakeholder groups.

The 10 priorities originally identified by the Patient Advisory align fairly well with some recent priority setting initiatives in the province. The BC Ministry of Health recently identified eight service delivery priorities for the province's health system in 2014[29]. These were re-confirmed at the primary care level by the BC-PHCRN research, clinical, and policy leads in 2015[21], but no patients were involved in this process. There is considerable overlap between the previous BC-PHCRN priorities and those reported herein, although there were two uniquely-identified Patient Advisory priorities that were not advanced by either the BC Ministry of Health or BC-PHCRN: *Mental health resources* (albeit, access to specialist treatment, in general, was



1  
2  
3 mentioned by both organizations, and reducing demand on hospitals by improving care for  
4  
5 those with mental health and substance use issues was one of five strategic priorities for the BC  
6  
7 Ministry of Health in 2017[30]) and *Improve and strengthen patient-provider communication*.

8  
9  
10 There were also examples where patient perspectives added depth and context. While both  
11  
12 sets of priorities spoke to the need to address challenges specific to rural and remote settings,  
13  
14 patients highlighted that transportation needs to be considered, and privacy and stigma may  
15  
16 impact those in rural areas. The previous BC-PHCRN priorities included the need to enhance  
17  
18 access, utilization, and continuity of patient information with other providers and levels of care,  
19  
20 but patients spoke more directly to the need for electronic health records and the ability to  
21  
22 access their medical records themselves. Finally, while the previous priorities noted issues  
23  
24 around workforce planning, patients framed this as being unable to find a regular doctor or  
25  
26 other primary health care provider. This highlights the value of including patients directly in  
27  
28 setting priorities for primary care, and is another demonstration of how the priorities of  
29  
30 patients and other stakeholders might differ.  
31  
32  
33  
34  
35  
36  
37

38 The Dialogue Model, coupled with the Nominal Group Technique, was a useful framework for  
39  
40 identifying patient priorities for primary health care research. This model has been used for  
41  
42 agenda setting in many condition-specific populations, such as burns, diabetes, kidney disease,  
43  
44 cystic fibrosis, dementia, bipolar disorder[1], but PREFeR is the first instance of primary care  
45  
46 priority setting with a generic population that we are aware of. That said, the five phases of the  
47  
48 Dialogue Model were modified substantially to address the aim of PREFeR, which explicitly  
49  
50 focuses on patient priorities. Consistent with Canada's Strategy for Patient Oriented Research,  
51  
52 the Patient Advisory members were research partners in PREFeR and contributed to planning  
53  
54  
55  
56  
57  
58  
59  
60

1  
2  
3 and shaping the research activities. Their dual role as research participants and team members  
4  
5 means that, to some degree, we shifted control and power to patients within the process,  
6  
7 which is inconsistent with the Dialogue Model. This was implemented in a context where  
8  
9 policymakers, clinicians, and researchers had previously worked to identify priorities in the  
10  
11 absence of patients. Perspectives from these other stakeholder groups were, however,  
12  
13 gathered and compared to patient priorities, albeit later in the project. In the end, these  
14  
15 aligned quite closely, though patients identified some additional priorities and added additional  
16  
17 context and depth to existing ones. In addition, the language used in the final topics was agreed  
18  
19 on by patient team members, although different terminology may be more common among  
20  
21 researchers.  
22  
23  
24  
25  
26

27  
28 Another notable divergence is that we identified *topics* for future research, rather than specific  
29  
30 research questions. The top-rated topics are broad, and many reflect priorities for health  
31  
32 system change that may be informed by research, but are not themselves research questions.  
33  
34 Results from rapid literature reviews of the 10 topics, along with results from the 'horizon  
35  
36 scanning' survey with BC researchers relating to completed, current or upcoming research on  
37  
38 the 10 topics, will provide valuable information about the nature and extent of research on the  
39  
40 topics. In some cases, the topics may suggest a need for strengthened knowledge translation or  
41  
42 implementation science to inform changes to policies or service delivery rather than additional  
43  
44 research. Also, as the searches covered broad topics, but were limited to BC and Canada, we  
45  
46 recommend that more thorough reviews should be conducted that are specific to any future  
47  
48 research objectives.  
49  
50  
51  
52  
53  
54  
55  
56  
57  
58  
59  
60

1  
2  
3 The main strengths of the current research are the contribution and partnership of patients in  
4 the priority setting exercises, using a structured framework to shape the research activities, and  
5 the volume of patients and providers completing the online surveys. However, there are several  
6 notable limitations to our approach. Although the initial priorities were developed by a group of  
7 patients purposively recruited to maximize diversity with regard to gender, ethnicity, prior  
8 research experience, health region and health issues, they were mostly well educated and had  
9 previous experience with research, and we cannot claim to have reached saturation in possible  
10 topics. We also decided to limit the subsequent survey to 10 topics in order to make the online  
11 surveys more manageable. We did not directly solicit additional topics from survey  
12 respondents, and there are undoubtedly topics of high priority to patients missed in this  
13 process. Given the survey was conducted predominantly online and largely distributed within  
14 networks related to health care and health research, respondents are unlikely to be  
15 representative of the province as a whole. This might affect the generalizability of these results.  
16  
17 This project demonstrates the feasibility of including patients in priority setting exercises and  
18 offers an approach that is workable within the context of primary care, rather than a condition-  
19 specific population. The identified topics overlap with, but expand on, previously identified  
20 priorities, and the patient and primary care provider surveys highlighted more alignment than  
21 divergence between these two stakeholder groups in rating the topics. Nevertheless, two novel  
22 topics addressing mental health resources and patient-provider communication were identified  
23 here, underscoring the importance of including patients in primary care priority setting. These  
24 results, coupled with those of the remaining activities in this project, will jointly provide key  
25 considerations for setting future primary care research questions.  
26  
27  
28  
29  
30  
31  
32  
33  
34  
35  
36  
37  
38  
39  
40  
41  
42  
43  
44  
45  
46  
47  
48  
49  
50  
51  
52  
53  
54  
55  
56  
57  
58  
59  
60

1  
2  
3  
4  
5  
6  
7  
8  
9  
10  
11  
12  
13  
14  
15  
16  
17  
18  
19  
20  
21  
22  
23  
24  
25  
26  
27  
28  
29  
30  
31  
32  
33  
34  
35  
36  
37  
38  
39  
40  
41  
42  
43  
44  
45  
46  
47  
48  
49  
50  
51  
52  
53  
54  
55  
56  
57  
58  
59  
60

For peer review only

## Acknowledgements

We are grateful to the 10 BC-PHCRN Patient Advisory members (Yaron Butterfield, Regina Cid, Chad Dickie, Penny Henderson, Brenda Jagroop, Ravin Johl, Kent Cadogan Loftsgard, Marilyn Parker, Hayley Pelletier, and one other who wished to remain anonymous) for volunteering their time, openly sharing their experiences, and contributing so valuably to PREFeR. We thank the BC SUPPORT Unit for in-kind support and helping to publicize this study. The Patient Voices Network assisted with recruiting the Patient Advisory. The BC-PHCRN generously provided support to PREFeR, both administratively and through engagement with the Patient Advisory. The Centre for Health Services and Policy Research provided in-kind support through salary for a project coordinator. Additional co-investigators who contributed to this project: Dr Sabrina T. Wong, Dr Kim McGrail, Dr Rita McCracken, Dr Vanessa Brcic, and Victoria Schuckel.

## Footnotes

## Author Contributions

LE and MRL designed and led all phases of the project. Specific to the results reported in this paper, LE facilitated the priority setting exercises, thematically grouped the primary care experiences into topics, carried out the priority setting data entry and rankings, and drafted this paper. MRL is the PI for the PREFeR Project, oversaw all phases of the project, and contributed feedback to this paper. MRL and MM recruited the Patient Advisory members. MM led early engagement with the Patient Advisory, oversaw all administrative activities for and helped facilitate the priority setting exercises, and provided feedback on this paper. YB, RJ, KCL, HP are members of the BC Primary Health Care Research Network Patient Advisory and patient partners in PREFeR who provided feedback on this paper, as well as contributing to all aspects of the priority setting exercises reported herein. CMcG provided background information and training on research to the Patient Advisory, provided additional support at the priority setting workshop, and commented on this paper.

## Funding

This work was supported by the Canadian Institutes of Health Research Patient-Oriented Research Collaboration (Grant number 151801).

## Competing interests

None declared.

## Ethical approval

Ethics approval advice was sought and was deemed not required by the Simon Fraser University Research Ethics Board for the Consultation and Exploration phases of the project involving the Patient Advisory. Since research team members belonged to two different institutions, harmonized ethical approval was jointly granted by the Simon Fraser University and the University of British Columbia Research Ethics Boards for the topic importance surveys (Reference number 20018s0051).

## Data sharing

Online survey data from 464 patients and 173 primary care providers, anonymously provided, which includes ratings of the importance of the top 10 patient-generated primary care topics. Data are available from Ruth Lavergne (Email: [ruth\\_lavergne@sfu.ca](mailto:ruth_lavergne@sfu.ca)).

## References

- 1 Raeymaekers P. Mind the gap! Multi-stakeholder dialogue for priority setting in health research. Brussels: King Baudouin Foundation; 2016:7–42. <https://www.kbs-frb.be/en/Activities/Publications/2016/20160426PP> (accessed 3 Aug 2017).
- 2 Stewart RJ, Caird J, Oliver K, et al. Patients' and clinicians' research priorities: patients' and clinicians' research priorities. *Health Expect*. 2011;14:439–48. doi: 10.1111/j.1369-7625.2010.00648.x
- 3 Tong A, Crowe S, Chando S, et al. Research priorities in CKD: report of a national workshop conducted in Australia. *Am J Kidney Dis*. 2015;66:212–22. doi: 10.1053/j.ajkd.2015.02.341
- 4 Crowe S, Fenton M, Hall M, et al. Patients', clinicians' and the research communities' priorities for treatment research: there is an important mismatch. *Res Involv Engagem*. 2015;1:2. doi: 10.1186/s40900-015-0003-x
- 5 Chalmers I, Bracken MB, Djulbegovic B, et al. How to increase value and reduce waste when research priorities are set. *Lancet*. 2014;383:156–65. doi: 10.1016/S0140-6736(13)62229-1
- 6 Manafò E, Petermann L, Vandall-Walker V, et al. Patient and public engagement in priority setting: a systematic rapid review of the literature. *PLoS ONE*. 2018;13:e0193579. doi: 10.1371/journal.pone.0193579
- 7 Kirwan JR, de Wit M, Frank L, et al. Emerging guidelines for patient engagement in research. *Value Health*. 2017;20:481–6. doi: 10.1016/j.jval.2016.10.003
- 8 NAPCRG's Research Advocacy Committee. Primary care research priorities identified and shared with stakeholders. *Ann Fam Med*. 2014;12:381–2. doi: 10.1370/afm.1678
- 9 Ball L, Barnes K, Leveritt M, et al. Developing research priorities in Australian primary health care: a focus on nutrition and physical activity. *Aust J Prim Health*. 2017;23:554–559. doi: 10.1071/PY16068
- 10 MacFarlane A, Galvin R, O'Sullivan M, et al. Participatory methods for research prioritization in primary care: an analysis of the World Café approach in Ireland and the USA. *Fam Pract*. 2017;34:278–284. doi: 10.1093/fampra/cmw104
- 11 Blaum C, Tinetti M, Rich MW, et al. A research agenda to support patient priorities care for adults with multiple chronic conditions [White paper]. Patient-Centered Outcomes Research Institute; 2017. <https://www.pcori.org/sites/default/files/NYU2870-White-Paper.pdf> (accessed 19 Jan 2019)
- 12 Morris RL, Stocks SJ, Alam R, et al. Identifying primary care patient safety research priorities in the UK: a James Lind Alliance Priority Setting Partnership. *BMJ Open*. 2018;8:e020870. doi: 10.1136/bmjopen-2017-02087
- 13 Yoshida S. Approaches, tools and methods used for setting priorities in health research in the 21(st) century. *J Glob Health*. 2016;6:010507. doi: 10.7189/jogh.06.010507
- 14 The James Lind Alliance. The James Lind Alliance Guidebook, Version 7. Southampton: National Institute for Health Research Evaluation, Trials and Studies Coordinating Centre, 2018.



1  
2  
3 <http://www.jla.nihr.ac.uk/jla-guidebook/downloads/Print-JLA-guidebook-version-7-March-2018.pdf>  
4 (accessed 16 Jul 2018).  
5

6 15 Broerse JEW, Zweekhorst MBM, van Rensen AJML, et al. Involving burn survivors in agenda setting on  
7 burn research: an added value? *Burns*. 2010;36:217–31. doi: 10.1016/j.burns.2009.04.004  
8

9  
10 16 The James Lind Alliance. The James Lind Alliance Guidebook, Version 6. Southampton: National  
11 Institute for Health Research Evaluation, Trials and Studies Coordinating Centre, 2016.  
12 <http://www.jla.nihr.ac.uk/jla-guidebook/downloads/JLA-Guidebook-Version-6-February-2016.pdf>  
13 (accessed 30 Aug 2017).  
14

15 17 Ryan M, Scott D, Reeves C, et al. Eliciting public preferences for healthcare: a systematic review of  
16 techniques. *Health Technol Assess*. 2001;5:1–186.  
17

18 18 Rudan I, Kapiriri L, Tomlinson M, et al. Evidence-based priority setting for health care and research:  
19 tools to support policy in maternal, neonatal, and child health in Africa. *PLoS Med*. 2010;7:e1000308.  
20 doi: 10.1371/journal.pmed.1000308  
21

22 19 Cochrane Priority Setting Methods Group. Plain language summaries of research priority setting  
23 methods. [https://methods.cochrane.org/prioritysetting/plain-language-summaries-research-priority-](https://methods.cochrane.org/prioritysetting/plain-language-summaries-research-priority-setting-methods)  
24 [setting-methods](https://methods.cochrane.org/prioritysetting/plain-language-summaries-research-priority-setting-methods) (accessed 16 Jul 2018).  
25  
26

27 20 Canadian Institutes of Health Research. Canada's Strategy for Patient-Oriented Research: improving  
28 health outcomes through evidence-informed care; 2011. [http://www.cihr-irsc.gc.ca/e/documents/P-](http://www.cihr-irsc.gc.ca/e/documents/P-O_Research_Strategy-eng.pdf)  
29 [O\\_Research\\_Strategy-eng.pdf](http://www.cihr-irsc.gc.ca/e/documents/P-O_Research_Strategy-eng.pdf) (accessed 19 Jan 2019)  
30

31 21 BC Primary Health Care Research Network. Research priorities. [https://spor-](https://spor-bcphcrn.ca/about/research-priorities/)  
32 [bcphcrn.ca/about/research-priorities/](https://spor-bcphcrn.ca/about/research-priorities/) (accessed 16 Jul 2018).  
33

34 22 Domecq JP, Prutsky G, Elraiyah T, et al. Patient engagement in research: a systematic review. *BMC*  
35 *Health Serv Res*. 2014;14:89. doi: 10.1186/1472-6963-14-89  
36  
37

38 23 Delbecq A, van de Ven A, Gustafson D. Group techniques for program planning, a guide to nominal  
39 group and Delphi processes. Glenview, IL: Scott, Foresman and Company, 1975.  
40

41 24 McMillan SS, Kelly F, Sav A, et al. Using the Nominal Group Technique: how to analyse across multiple  
42 groups. *Health Serv Outcomes Res Methodol*. 14:92–108. doi: 10.1007/s10742-014-0121-1  
43

44 25 Rice DB, Cañedo-Ayala M, Turner KA, et al. Use of the nominal group technique to identify  
45 stakeholder priorities and inform survey development: an example with informal caregivers of people  
46 with scleroderma. *BMJ Open*. 2018;8:e019726. doi: 10.1136/bmjopen-2017-019726  
47  
48

49 26 Sink DS. Using the nominal group technique effectively. *Natl Product Rev*. 1983;2:173–84. doi:  
50 10.1002/npr.4040020209  
51

52 27 Gastelurrutia MA, Benrimoj SIC, Castrillon CC, et al. Facilitators for practice change in Spanish  
53 community pharmacy. *Pharm World Sci*. 2009;31:32–9. doi: 10.1007/s11096-008-9261-0  
54  
55  
56  
57  
58  
59

1  
2  
3 28 Government of British Columbia. Sub-provincial population estimates.  
4 <http://www.bcstats.gov.bc.ca/apps/PopulationEstimates.aspx> (accessed 22 Aug 2018)  
5

6 29 British Columbia Ministry of Health. Setting priorities for the B.C. health system. 2014.  
7 <http://www.health.gov.bc.ca/library/publications/year/2014/Setting-priorities-BC-Health-Feb14.pdf>  
8 (accessed 16 Jul 2018)  
9

10 30 British Columbia Ministry of Health. Ministry of Health patients as partners 2017 provincial dialogue  
11 report. 2017. [https://www2.gov.bc.ca/assets/gov/health/about-bc-s-health-care-system/heath-care-](https://www2.gov.bc.ca/assets/gov/health/about-bc-s-health-care-system/heath-care-partners/patients-as-partners/provincial-annual-dialogue-report-2017.pdf)  
12 [partners/patients-as-partners/provincial-annual-dialogue-report-2017.pdf](https://www2.gov.bc.ca/assets/gov/health/about-bc-s-health-care-system/heath-care-partners/patients-as-partners/provincial-annual-dialogue-report-2017.pdf) (accessed 16 Jul 2018)  
13  
14  
15

## 16 17 18 19 20 Figure Legend

21  
22  
23  
24 Figure 1. Flowchart of key activities of the PREFeR Project, framed within the five phases of a modified  
25  
26 Dialogue Model  
27  
28  
29  
30  
31  
32  
33  
34  
35  
36  
37  
38  
39  
40  
41  
42  
43  
44  
45  
46  
47  
48  
49  
50  
51  
52  
53  
54  
55  
56  
57  
58  
59  
60

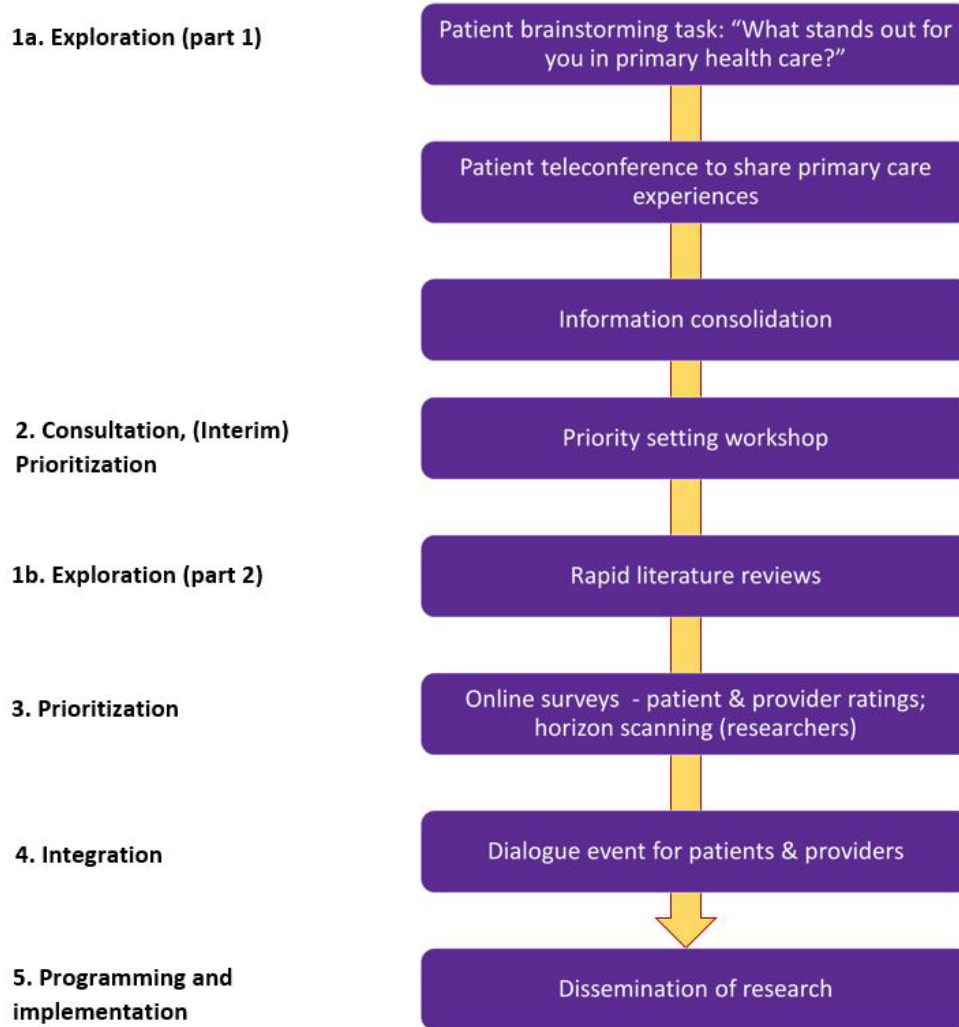

Figure 1. Flowchart of key activities of the PREFeR Project, framed within the five phases of a modified Dialogue Model

## Online survey questions – Patient version

### [Page 1 questions] **How important are these topics to you?**

Below are the 10 topics that have been identified by patients as primary health care priorities, which could be developed into more specific research questions.

It is important that everyone understands what each topic means in a similar way. For this reason, we include some statements or experiences from patients that help illustrate each topic. These examples are listed as bullet points under each topic.

When we use the term *primary health care provider*, we mean health care professionals, such as family doctors (GPs), nurses, and nurse practitioners.

- **After you have read all of the bullet points under each general topic, please rate EACH of the following 10 topics in terms of how important they are to you as a patient.**
- This may include how important they are to you personally, as well as how they affect people who are important to you (your friends and family members).
- Please rate each topic on its own. It is fine to use the same rating for more than one topic.

### **How important are each of these topics to you on a scale from *Not at all important* to *Very important*?**

#### **1) Unable to find a regular family doctor or other primary health care provider**

*Example statements or experiences:*

- Not all patients are able to find a primary health care provider accepting patients
- Patients find it hard to get the care they need without a consistent primary health care provider (e.g., family doctor)

|                       |                       |                       |                       |                       |                           |
|-----------------------|-----------------------|-----------------------|-----------------------|-----------------------|---------------------------|
| 1                     | 2                     | 3                     | 4                     | 5                     | 6                         |
| <input type="radio"/>     |
| Not at all important  | Slightly important    | Moderately important  | Important             | Very important        | Don't know/Not applicable |

#### **2) Improve and strengthen communication between patients and primary health care providers**

*Example statements or experiences:*

- Identify strategies to help health care providers understand the concerns, priorities and/or symptoms that patients are trying to communicate

- Find ways to improve decision-making that is shared between patients and primary health care providers
- Find solutions to problems caused by language and communication barriers

|                       |                       |                       |                       |                       |                           |
|-----------------------|-----------------------|-----------------------|-----------------------|-----------------------|---------------------------|
| 1                     | 2                     | 3                     | 4                     | 5                     | 6                         |
| <input type="radio"/>     |
| Not at all important  | Slightly important    | Moderately important  | Important             | Very important        | Don't know/Not applicable |

### 3) Mental health resources

*Example statements or experiences:*

- Limited or no availability of resources for mental health, addictions and substance use needs through primary care
- Gap between primary care and specialist services
- It is common for people to experience mental health issues at the same time as they are also experiencing physical health conditions, and this situation is poorly managed

|                       |                       |                       |                       |                       |                           |
|-----------------------|-----------------------|-----------------------|-----------------------|-----------------------|---------------------------|
| 1                     | 2                     | 3                     | 4                     | 5                     | 6                         |
| <input type="radio"/>     |
| Not at all important  | Slightly important    | Moderately important  | Important             | Very important        | Don't know/Not applicable |

### 4) Support for living with chronic conditions

*Example statements or experiences:*

- Limited time in appointments to manage chronic conditions
- It can be difficult to find a family doctor if patients are perceived to have 'complex' conditions
- Without a family doctor, there is no support for management of a chronic disease (e.g., getting repeat prescriptions)
- Continuity of care is essential when living with a chronic disease
- Clear communication about what patients can expect and what should happen next is needed, especially because there can be long periods of time between appointments

|                       |                       |                       |                       |                       |                           |
|-----------------------|-----------------------|-----------------------|-----------------------|-----------------------|---------------------------|
| 1                     | 2                     | 3                     | 4                     | 5                     | 6                         |
| <input type="radio"/>     |
| Not at all important  | Slightly important    | Moderately important  | Important             | Very important        | Don't know/Not applicable |

## 5) Accessing care when and where patients need it

*Example statements or experiences:*

- Few options exist for after-hours care (outside of normal working hours, weekends)
- Patients weigh convenience of walk-in clinics and easier access to emergency departments over the desire to see a regular doctor
- There is a need for care in patients' homes and long-term care

| 1                     | 2                     | 3                     | 4                     | 5                     | 6                         |
|-----------------------|-----------------------|-----------------------|-----------------------|-----------------------|---------------------------|
| <input type="radio"/>     |
| Not at all important  | Slightly important    | Moderately important  | Important             | Very important        | Don't know/Not applicable |

## 6) Improving continuity and coordination

*Example statements or experiences:*

- Need for primary health care providers to coordinate care (i.e., communicate with specialists, organize care between hospital and community)
- Problems accessing primary health care providers make it difficult to maintain continuity with the same health care professional
- Lack of consistency when seeing multiple health care professionals with different levels of expertise

| 1                     | 2                     | 3                     | 4                     | 5                     | 6                         |
|-----------------------|-----------------------|-----------------------|-----------------------|-----------------------|---------------------------|
| <input type="radio"/>     |
| Not at all important  | Slightly important    | Moderately important  | Important             | Very important        | Don't know/Not applicable |

## 7) New models of primary care that include other health care professionals

*Example statements or experiences:*

- Need for a community of health care professionals (e.g., nurse practitioners, pharmacists, etc.) that takes advantage of their full expertise
- Need for better collaboration and cooperation among health care professionals and health disciplines
- Need for other options to access primary care services that do not require an in-person visit with a family doctor (e.g., prescription renewals)

| 1                     | 2                     | 3                     | 4                     | 5                     | 6                         |
|-----------------------|-----------------------|-----------------------|-----------------------|-----------------------|---------------------------|
| <input type="radio"/>     |
| Not at all important  | Slightly important    | Moderately important  | Important             | Very important        | Don't know/Not applicable |

## 8) Information sharing, including electronic medical records

*Example statements or experiences:*

- The lack of coordinated information sharing between health care professionals means re-telling health 'story' repeatedly
- Treatments/information given may not always be communicated between health professionals and across settings, including walk-in clinics, home-care, hospital
- Patients are unable to access their own medical records
- Patient should not need to manage communication among their health care providers

|                       |                       |                       |                       |                       |                           |
|-----------------------|-----------------------|-----------------------|-----------------------|-----------------------|---------------------------|
| 1                     | 2                     | 3                     | 4                     | 5                     | 6                         |
| <input type="radio"/>     |
| Not at all important  | Slightly important    | Moderately important  | Important             | Very important        | Don't know/Not applicable |

## 9) Care guided by patient needs, values, preferences, and priorities

*Example statements or experiences:*

- A variety of treatment options should be explained and offered, including non-drug alternatives
- More holistic approach needed, where the whole person is treated, not just whatever particular body part/system is 'ill'
- Find ways to meet individual patients' expectations for information, especially in the context of widespread access to online information

|                       |                       |                       |                       |                       |                           |
|-----------------------|-----------------------|-----------------------|-----------------------|-----------------------|---------------------------|
| 1                     | 2                     | 3                     | 4                     | 5                     | 6                         |
| <input type="radio"/>     |
| Not at all important  | Slightly important    | Moderately important  | Important             | Very important        | Don't know/Not applicable |

## 10) Challenges in small towns/cities and remote areas

*Example statements or experiences:*

- Less choice and availability of primary care providers, and less access to specialists and diagnostic testing
- Transportation needs before/after care must be considered
- Privacy/stigma issues may significantly impact those in rural areas (e.g., prescription pick-up)

|                       |                       |                       |                       |                       |                           |
|-----------------------|-----------------------|-----------------------|-----------------------|-----------------------|---------------------------|
| 1                     | 2                     | 3                     | 4                     | 5                     | 6                         |
| <input type="radio"/>     |
| Not at all important  | Slightly important    | Moderately important  | Important             | Very important        | Don't know/Not applicable |

Please use this space if you have any comments you'd like to share:

[Page 2 questions]

## General information about you

In order for us to better understand possible differences between groups of people in ratings of primary health care topics, please complete the following anonymous information about yourself. It is important for us to have an accurate understanding of who is completing these surveys, but we will not be able to identify you from your answers.

### 1. How old are you?

- Under 20 years
- 20-29 years
- 30-39 years
- 40-49 years
- 50-59 years
- 60-69 years
- 70-79 years
- 80-89 years
- Over 90 years
- Prefer not to say

### 2. How do you describe yourself?

- Male
- Female
- Transgender
- Do not identify as female, male, or transgender
- Prefer not to say



1  
2  
3 **3. You may belong to one or more racial or cultural groups on the following list. Are**  
4 **you... ? (Check ALL that apply.)**

- 5  White
- 6  Chinese
- 7  Aboriginal (First Nations, Métis, or Inuit)
- 8  South Asian (e.g., East Indian, Pakistani, Sri Lankan, etc.)
- 9  Black
- 10  Filipino
- 11  Latin American
- 12  Southeast Asian (e.g., Cambodian, Indonesian, Laotian, Vietnamese, etc.)
- 13  Arab
- 14  West Asian (e.g., Afghan, Iranian)
- 15  Japanese
- 16  Korean
- 17  Other, please specify: \_\_\_\_\_
- 18  Prefer not to say

19 **4. What is the name of the town or city you currently live in?** \_\_\_\_\_

20 *NB: If you live in more than one place, please put the place you live the majority of the*

21 *time.*

22 **5. What are the first 3 digits of your postal code?** \_\_\_\_\_

23 *NB: We cannot identify where you live from this information, but it allows us to know*

24 *roughly where people completing the survey live.*

25 *NB: If you live in more than one place, please put the place you live the majority of the*

26 *time.*

27 **6. How many years have you been living in BC?**

28 If you moved away and came back to BC, we are interested in the number of years you

29 have been living in BC since returning to BC most recently.

- 30  I live outside of BC
- 31  0-2 years
- 32  3-5 years
- 33  6-10 years
- 34  11-15 years

1  
2  
3  
4  More than 15 years

5  
6 **7. What is your marital status?**

7  Single/never legally married

8  
9  Married

10  
11  Living common-law

12  
13  Separated, but still legally married

14  
15  Divorced

16  
17  Widowed

18  
19  Prefer not to say

20  
21 **8. What is your highest level of education?**

22  Some elementary/junior school, but not all grades completed

23  
24  Completed elementary/junior school

25  
26  High school (secondary school) diploma or certificate

27  Trade certificate or diploma from a vocational school or apprenticeship training

28  
29  Non-university certificate or diploma from a community college, CEGEP, school of  
30 nursing, etc.

31  
32  University certificate below bachelor's level

33  
34  Bachelor's degree or teacher's college (e.g., B.A., B.A. (Hons.), B.Sc., B.Ed.)

35  
36  University degree or certificate above bachelor's degree (e.g., M.A., M.Sc., M.B.A.,  
37 M.D., Ph.D.)

38  
39  Other, please specify: \_\_\_\_\_

40  
41  Prefer not to say

42  
43 **9. Last week, was your main activity working at a paid job or business, looking for paid  
44 work, going to school, caring for children, household work, retired or something else?**

45  Working at a paid job or business

46  
47  Vacation (from paid work)

48  
49  Looking for paid work

50  
51  Going to school (including vacation from school)

52  
53  Caring for children

54  
55  Household work

56  
57  Retired

- 1  
2  
3  
4  Maternity/paternity leave  
5  Long-term illness  
6  
7  Volunteering  
8  
9  Care-giving other than for children  
10  
11  Other (please specify): \_\_\_\_\_  
12  
13  Prefer not to say

14  
15 **10. What kind of housing do you currently live in?**

- 16  Owned house, duplex or townhouse (not including motorhome)  
17  
18  Owned apartment or condominium  
19  
20  Owned motorhome  
21  
22  Rented house, duplex or townhouse  
23  
24  Rented apartment or condominium  
25  
26  Assisted-living (community group housing)  
27  
28  Other, please specify: \_\_\_\_\_  
29  
30  Prefer not to say

31  
32 **11. Do you currently have any of the following long-term health conditions?**

33 **We are interested in "long-term conditions" which are expected to last or have**  
34 **already lasted 6 months or more and that have been diagnosed by a health**  
35 **professional. (Check ALL that apply.)**

- 36  Asthma  
37  
38  Chronic bronchitis, emphysema or chronic obstructive pulmonary disease or COPD  
39  
40  Arthritis (for example, osteoarthritis, rheumatoid arthritis, gout or any other type,  
41 excluding fibromyalgia)  
42  
43  Back problems, excluding scoliosis, fibromyalgia and arthritis  
44  
45  Mood disorder (such as depression, bipolar disorder, mania or dysthymia)  
46  
47  Anxiety disorder (such as a phobia, obsessive-compulsive disorder or a panic disorder)  
48  
49  Diabetes  
50  
51  Osteoporosis  
52  
53  High blood pressure  
54  
55  High blood cholesterol or lipids  
56  
57  Heart disease  
58  
59  
60

- 1  
2  
3  
4      Stroke  
5      Cancer  
6  
7      Alzheimer's Disease or any other dementia  
8  
9      Other, please specify: \_\_\_\_\_  
10  
11     None of these  
12  
13     Prefer not to say

14 **12. Do you have a regular health care provider in BC? By this, we mean one health**  
15 **professional that you regularly see or talk to when you need care or advice for your**  
16 **health.**

- 17  
18  
19     Yes    No

20  
21        **a. What is the reason why you do not have a regular health care provider?**

- 22         Do not need one in particular, but you have a usual place of care  
23  
24         No one available in the area  
25  
26         No one in the area is taking new patients  
27  
28         I have not tried to find one  
29  
30         Had one who left or retired  
31  
32         Other (please specify): \_\_\_\_\_  
33  
34  
35  
36  
37  
38  
39  
40  
41  
42  
43  
44  
45  
46  
47  
48  
49  
50  
51  
52  
53  
54  
55  
56  
57  
58  
59  
60

## Researcher-suggested primary care topic headings compared to patient-revised topic headings

| Researcher-proposed topic headings                      | Patient-revised topic headings                                                             |
|---------------------------------------------------------|--------------------------------------------------------------------------------------------|
| 1) More patient-centred care needed                     | 1) Care guided by patient needs, values, preferences, and priorities                       |
| 2) Communication – Informing/empowering patients        | 2) Informing and empowering patients                                                       |
| 3) Improving patient-provider communication             | 3) Improve and strengthen communication between patients and primary health care providers |
| 4) Electronic Medical Records (EMR)/information sharing | 4) Information sharing, including electronic medical records                               |
| 5) Resources to better manage one's own health          | 5) Resources to better manage one's own health                                             |
| 6) Prevention/early intervention                        | 6) Prevention/early intervention                                                           |
| 7) Inability to access regular family doctors (GPs)     | 7) Unable to find a regular family doctor or other primary health care provider            |

|                                                       |                                                                                                             |
|-------------------------------------------------------|-------------------------------------------------------------------------------------------------------------|
| 8) Inadequacy of walk-in clinics                      | 8) Inadequacy of compensation model where doctors receive a set amount of money per visit (fee-for-service) |
| 9) Accessing after-hours care                         | 9) Accessing care where and when patients need it                                                           |
| 10) Access to specialist knowledge                    | 10) Access to specialist knowledge                                                                          |
| 11) Impact of a new diagnosis                         | 11) Support for living with chronic conditions                                                              |
| 12) Care of chronic conditions                        |                                                                                                             |
| 13) Accessing mental health resources                 | 12) Mental health resources                                                                                 |
| 14) Challenges in small towns/cities                  | 13) Challenges in small towns/cities and remote areas                                                       |
| 15) Patient stigma                                    | 14) Addressing stigma and bias                                                                              |
| 16) Gaps in clinical evidence/information             | 15) Knowledge gaps in clinical evidence and information                                                     |
| 17) Broaden roles for other health care professionals | 16) New models of primary care that include other health care professionals                                 |
| 18) Inefficient practices put pressure on the system  | 17) Improving continuity and coordination                                                                   |

1  
2  
3  
4  
5  
6  
7  
8  
9  
10  
11  
12  
13  
14  
15  
16  
17  
18  
19  
20  
21  
22  
23  
24  
25  
26  
27  
28  
29  
30  
31  
32  
33  
34  
35  
36  
37  
38  
39  
40  
41  
42  
43  
44  
45  
46  
47  
48  
49  
50  
51  
52  
53  
54  
55  
56  
57  
58  
59  
60

|                            |                            |
|----------------------------|----------------------------|
| 19) No universal drug plan | 18) No universal drug plan |
|----------------------------|----------------------------|

## Patient-revised topics and full list of bullet point examples and experiences from the interim priority setting workshop

### 1) Care guided by patient needs, values, preferences, and priorities

- “Block and tackle” approach to protecting territory (i.e., using defensive/offensive tactics), rather than patient-centred care
- Care needs to keep pace with patients’ expectations for information, especially in the context of widespread access to online information
- Need to embark on a journey of discovery with the patient
- Role of primary care provider is to be a coordinator of care in a team-based setting
- More holistic approach needed, where the whole body is treated, not just whatever particular part/system is ‘ill’
- Consideration of non-pharmacological options for treatment

### 2) Informing and empowering patients

- Information not explained to patient adequately
- Not all treatment options explained/offered, especially around alternative medicine
- Advice needs to be targeted in a way that patients know how to take action (don’t just give diagnosis)
- Information not clearly communicated to patients about how/why something being prescribed
- Treatment recommendations need to be appropriate for/tailored to the needs of the community (including low-income)
- Resources patients are directed to need to be appropriate and available based on needs of the community (including low-income)
- Guidance on red flags and when to seek care
- Strategies to address/accept ‘new normal’ after a new diagnosis
- Shock of new diagnosis may impair understanding/ability to ask questions during initial consultation
- Understanding individual patient priorities for their care and targeting care appropriately

### 3) Improve and strengthen communication between patients and primary health care providers

- Patients may not describe underlying issue/relevant symptoms, but questioning could identify it
- Patients may not have time/ability to process information to ask all questions during a consultation
- Enhancing decision-making shared between patients and providers
- Addressing language barriers in care
- Use recap strategy to check understanding

### 4) Information sharing, including electronic medical records

- Lack of coordinated information sharing between health care professionals (especially health authorities) means re-telling 'story' repeatedly & treatments/information given may never be known between health professionals and across settings including walk-in clinics, home-care, hospital
- Patients unable to access own EMR including clinical notes
- EMR often not reviewed before patient appointment, which leads to gaps in care
- Pharamnet works well in transferring prescription information between health authorities, but medical records don't similarly transfer
- Patient should not need to manage all of the communication within a care team
- Streamlined processes for patient-led consent and information sharing

### 5) Resources to better manage one's own health

- No access to EMR including clinical notes
- Should be ability to access information without seeing PHC physician (e.g., patient portal, patient-led chronic disease programming)
- No resources to help understand what patients can do to manage their own health (knowing schedule for check-ups, screening etc.)
- Lack of patient knowledge of clinical guidelines
- Patients need help interpreting what is and what isn't evidence-based
- Clarity needed around what to do when new to the province
- Need for centralized repositories with quality resources and programs available, including support groups



## 6) Prevention/early intervention

- Preventative medicine and lifestyle management not prioritized
- When, why and which health care professionals should do screening
- Lack of early interventions leads to poorer outcomes and higher cost down the road
- Roles for other professionals in preventative health care and lifestyle management

## 7) Unable to find a regular family doctor or other primary health care provider

- Weighing up convenience of walk-in over desire to see GP
- Places pressure on the emergency department
- Patients feel like a “product of the system”
- Hard to navigate healthcare system
- Receptionists act as gatekeepers (but without providing enough information)
- More students need to go into family practice
- Environmental/natural disasters impact patient health, which puts even further pressure on the system

## 8) Inadequacy of compensation model where doctors receive a set amount of money per visit (fee-for-service)

- Often not possible to discuss multiple, interrelated issues (chronic conditions)
- Encourages walk-in clinic practice which does not meet patient needs
- Walk-in clinics –line ups for appointments are for long periods (not suitable for some patients/weather) & waiting space isn't adequate
- Need research to understand how to most effectively compensate physician

## 9) Accessing care where and when patients need it

- Few options for after-hours care
- Need for care in home and long-term care
- Suitability of waiting space and physical design of clinics

## 10) Access to specialist knowledge

- Need for rapid access to specialist care for specific questions
- Processes to get specialist information that reduce need for face-to-face access to a specialist

- Need to keep patient in-the-loop on communication between primary care and specialists
- Direct access to specialists to answer a question

### 11) Support for living with chronic conditions

- No support for management of a chronic disease without a family doctor
- Family GPs refusing to accept patients with 'complex' conditions & ethics/implications of this
- Difficult to get repeat prescriptions filled without family GP
- Limited time with physician and nurse, especially with chronic conditions
- GPs could notify patients of support programs to help cope, including peer-to-peer support
- Some conditions cause cognitive difficulties (e.g., memory problems, difficulty processing or not correctly interpreting information)
- After a course of treatment, patient left somewhat alone dealing with side effects & feeling of being on own
- Can be long intervals between appointments & patient can 'feel lost' in this time interval
- Patient and doctor misconceptions likely with understanding condition/treatments
- Differentiation between chronic conditions and acquired conditions and recognition that there isn't always a causal relationship between them
- Continuity of care is essential in the context of chronic disease
- Clear communication of prognosis and pathway of care going forward, including the spectrum of possibilities

### 12) Mental health resources

- Often limited or no availability of resources for mental health and substance use needs
- Gap between primary care and specialists services, particularly in the absence of a diagnosis
- Information needed on how to access mental health and substance use resources
- Primary care physicians (and Emergency doctors) not qualified to manage complex mental health needs, so patients access acute care more often
- Co-existence of mental health and physical conditions poorly managed

### 13) Challenges in small towns/cities and remote areas

- Primary care doctors need to do more, since there are fewer specialists in small towns/cities
- Transportation needs must be considered
- Improved access to specialists also needed
- Less access to diagnostic testing
- Less choice/availability for doctors/treatments, which has larger impact on 'complex' conditions
- Privacy/stigma issues in rural areas (e.g., prescription pick-up)

### 14) Addressing stigma and bias

- Cultural safety and competency
- Community sensitivities
- Care for LGBTQ communities
- Stigma particular to transgender community
- Assumptions made based on health condition/background/socioeconomic status
- Effects of terminology, diagnoses, etc.
- Impact of stigma and bias on patient outcomes

### 15) Knowledge gaps in clinical evidence and information

- Issues of consistency across doctors when seeing multiple providers and levels of expertise (of GPs)
- GPs appear uncertain of correct course of care, or reluctant to perform procedures (provide clinical 'judgement')
- Knowledge and application of clinical guidelines
- Continuing education for practicing professionals
- Need to study who responds, not just the treatments themselves
- Treatment recommendations need to be appropriate for/tailored to the needs of the community (including low-income)
- Speed of implementation of scientific research (17 years) needs to be improved
- Patients want new treatments now, even though full evidence base may not be there
- Patients aware of differences in treatments between provinces and countries and want access to full set of options
- Scientific/research models only useful insofar as they predict outcomes in the real world – Magnitude of effect needs to be considered

## 16) New models of primary care including other health care professionals

- Need for better collaboration and cooperation among health care professionals and health disciplines
- Expanded roles for other health care professionals
- Better support needed for caregivers and home support workers, including respite care

## 17) Improving continuity and coordination

- Care outside of office (long-term care, home care) and outside of office hours is needed to ensure continuity
- Reluctance to renew prescriptions for more than three months
- Unnecessary appointments required to access services (e.g. vaccinations, physiotherapists)
- New questions occur to patients after an appointment, but no one to ask/have to make a new appointment to have these questions answered
- Emergency respondents appear well-trained, but often involves 4-6 health professionals
- Patients discharged from secondary care without ensuring adequate services in place (transportation, clean/safe home, family pressure/stress)

## 18) No universal drug plan

- Patients' limitations, needs & affordability/financial issues must be taken into account
  - Some 'over-the-counter' products are cheaper
  - Patients may skip/halve medications (appear non-adherent, but can't afford 'as prescribed')
  - Lack of coverage for prescription drugs puts pressure on the system elsewhere
- Difficulties with pharmacies inputting out-of-province information (when new to BC)
- Education for primary care providers on cost of prescription drugs to guide prescribing decisions

Patient-ranked raw scores (n=9) for primary care topics and methods of tabulating the top 10 priority topics

| Topic <sup>1</sup>                | Ranked scores by patients <sup>2</sup>                        |    |   |   |   |    |   |    |    |           | Sum of scores | Ranked priority (via scores) | Relative importance (%) <sup>3</sup> | Number of votes | Final ranked priority (via scores & votes) |
|-----------------------------------|---------------------------------------------------------------|----|---|---|---|----|---|----|----|-----------|---------------|------------------------------|--------------------------------------|-----------------|--------------------------------------------|
|                                   | 1                                                             | 2  | 3 | 4 | 5 | 6  | 7 | 8  | 9  |           |               |                              |                                      |                 |                                            |
|                                   | Care guided by patient needs, values, preferences, priorities | 7  |   | 9 |   | 10 |   | 10 | 8  | 7         |               |                              |                                      |                 |                                            |
| Information sharing, EMR          | 5                                                             | 1  | 8 | 6 | 5 |    | 7 | 6  | 8  | 46        | 2             | 9.3                          | 8                                    | 2               |                                            |
| Unable to find a doctor           |                                                               | 10 | 3 |   |   | 10 | 4 | 5  | 10 | 42        | 3             | 8.5                          | 6                                    | 3               |                                            |
| Accessing care when, where needed | 9                                                             | 7  | 4 | 3 | 2 | 8  | 3 |    | 5  | <b>41</b> | <b>4</b>      | <b>8.3</b>                   | <b>8</b>                             | <b>4</b>        |                                            |
| Support for chronic conditions    |                                                               | 8  | 1 | 8 |   | 6  | 2 | 10 | 6  | <b>41</b> | <b>4</b>      | <b>8.3</b>                   | <b>7</b>                             | <b>5</b>        |                                            |
| Mental health resources           | 8                                                             | 4  |   | 4 | 8 | 1  |   | 3  | 9  | 37        | 6             | 7.5                          | 7                                    | 6               |                                            |
| New models of primary care        | 10                                                            |    | 6 | 2 | 7 | 9  |   |    |    | 34        | 7             | 6.9                          | 5                                    | 7               |                                            |

1  
2  
3  
4  
5  
6  
7  
8  
9  
10  
11  
12  
13  
14  
15  
16  
17  
18  
19  
20  
21  
22  
23  
24  
25  
26  
27  
28  
29  
30  
31  
32  
33  
34  
35  
36  
37  
38  
39  
40  
41  
42  
43  
44  
45  
46  
47

|                                                        |   |    |   |    |   |   |    |           |           |            |            |           |
|--------------------------------------------------------|---|----|---|----|---|---|----|-----------|-----------|------------|------------|-----------|
| Improving continuity, coordination                     | 6 | 5  | 9 | 7  | 2 | 4 | 33 | 8         | 6.7       | 6          | 8          |           |
| Challenges in small towns/cities                       | 2 | 5  | 7 |    | 5 | 9 | 2  | 30        | 9         | 6.1        | 6          | 9         |
| Improve, strengthen patient-<br>provider communication | 4 |    | 2 | 7  | 2 | 8 | 4  | <b>27</b> | <b>10</b> | <b>5.5</b> | <b>6</b>   | <b>10</b> |
| Informing, empowering patients                         |   |    |   | 1  | 6 | 4 | 9  | 7         | <b>27</b> | <b>10</b>  | <b>5.5</b> | <b>5</b>  |
| Prevention/early intervention                          | 3 |    |   | 9  | 5 |   |    | 17        |           |            | 3          |           |
| Inadequacy of compensation model                       | 3 | 10 |   | 3  |   |   |    | 1         | 17        |            | 4          |           |
| No universal drug plan                                 |   |    |   | 10 | 4 |   |    | 3         | 17        |            | 3          |           |
| Resources to better manage health                      | 9 |    |   |    |   | 6 |    |           | 15        |            | 2          |           |
| Knowledge gaps in clinical evidence                    | 6 |    |   | 1  |   |   | 1  |           | 8         |            | 3          |           |
| Access to specialist knowledge                         |   |    |   | 5  |   | 1 |    |           | 6         |            | 2          |           |
| Addressing stigma and bias                             | 1 | 2  |   |    | 3 |   |    |           | 6         |            | 3          |           |

EMR = electronic medical record. Bold values indicate topics with ties.

<sup>1</sup> Topic headings have been shortened here for presentation ease. Refer to Supplementary file 2, column 2 for full topic headings.

<sup>2</sup> Ranked scores have been reverse scored, where 1=Least important and 10=Most important.

<sup>3</sup> Relative importance = [(topic score) / (maximum points for the group; i.e., number of patients (9) x 55 points) x 100]. The total of 55 points is derived from the sum of the 10 ranks (1+2+3+4+5+6+7+8+9+10).

1  
2  
3  
4  
5  
6  
7  
8  
9  
10  
11  
12  
13  
14  
15  
16  
17  
18  
19  
20  
21  
22  
23  
24  
25  
26  
27  
28  
29  
30  
31  
32  
33  
34  
35  
36  
37  
38  
39  
40  
41  
42  
43  
44  
45  
46  
47

For peer review only

## Standards for Reporting Qualitative Research (SRQR)\*

<http://www.equator-network.org/reporting-guidelines/srqr/>

Page/line no(s).

### Title and abstract

|                                                                                                                                                                                                                                                              |     |
|--------------------------------------------------------------------------------------------------------------------------------------------------------------------------------------------------------------------------------------------------------------|-----|
| <p><b>Title</b> - Concise description of the nature and topic of the study Identifying the study as qualitative or indicating the approach (e.g., ethnography, grounded theory) or data collection methods (e.g., interview, focus group) is recommended</p> | 1   |
| <p><b>Abstract</b> - Summary of key elements of the study using the abstract format of the intended publication; typically includes background, purpose, methods, results, and conclusions</p>                                                               | 3-4 |

### Introduction

|                                                                                                                                                                     |     |
|---------------------------------------------------------------------------------------------------------------------------------------------------------------------|-----|
| <p><b>Problem formulation</b> - Description and significance of the problem/phenomenon studied; review of relevant theory and empirical work; problem statement</p> | 6-8 |
| <p><b>Purpose or research question</b> - Purpose of the study and specific objectives or questions</p>                                                              | 7-8 |

### Methods

|                                                                                                                                                                                                                                                                                                                                                                                                             |              |
|-------------------------------------------------------------------------------------------------------------------------------------------------------------------------------------------------------------------------------------------------------------------------------------------------------------------------------------------------------------------------------------------------------------|--------------|
| <p><b>Qualitative approach and research paradigm</b> - Qualitative approach (e.g., ethnography, grounded theory, case study, phenomenology, narrative research) and guiding theory if appropriate; identifying the research paradigm (e.g., postpositivist, constructivist/ interpretivist) is also recommended; rationale**</p>                                                                            | 11-13        |
| <p><b>Researcher characteristics and reflexivity</b> - Researchers' characteristics that may influence the research, including personal attributes, qualifications/experience, relationship with participants, assumptions, and/or presuppositions; potential or actual interaction between researchers' characteristics and the research questions, approach, methods, results, and/or transferability</p> | 11-12        |
| <p><b>Context</b> - Setting/site and salient contextual factors; rationale**</p>                                                                                                                                                                                                                                                                                                                            | 11-13        |
| <p><b>Sampling strategy</b> - How and why research participants, documents, or events were selected; criteria for deciding when no further sampling was necessary (e.g., sampling saturation); rationale**</p>                                                                                                                                                                                              | 9, 18        |
| <p><b>Ethical issues pertaining to human subjects</b> - Documentation of approval by an appropriate ethics review board and participant consent, or explanation for lack thereof; other confidentiality and data security issues</p>                                                                                                                                                                        | 32           |
| <p><b>Data collection methods</b> - Types of data collected; details of data collection procedures including (as appropriate) start and stop dates of data collection and analysis, iterative process, triangulation of sources/methods, and modification of procedures in response to evolving study findings; rationale**</p>                                                                             | 11-14, 21-22 |



|                       |                                                                                                                                                                                                                                                       |              |
|-----------------------|-------------------------------------------------------------------------------------------------------------------------------------------------------------------------------------------------------------------------------------------------------|--------------|
| 1<br>2<br>3<br>4<br>5 | <b>Data collection instruments and technologies</b> - Description of instruments (e.g., interview guides, questionnaires) and devices (e.g., audio recorders) used for data collection; if/how the instrument(s) changed over the course of the study | 11-14        |
| 6<br>7<br>8           | <b>Units of study</b> - Number and relevant characteristics of participants, documents, or events included in the study; level of participation (could be reported in results)                                                                        | 18-21        |
| 9<br>10<br>11<br>12   | <b>Data processing</b> - Methods for processing data prior to and during analysis, including transcription, data entry, data management and security, verification of data integrity, data coding, and anonymization/de-identification of excerpts    | 11-14, 21-22 |
| 13<br>14<br>15<br>16  | <b>Data analysis</b> - Process by which inferences, themes, etc., were identified and developed, including the researchers involved in data analysis; usually references a specific paradigm or approach; rationale**                                 | 11-14        |
| 17<br>18<br>19<br>20  | <b>Techniques to enhance trustworthiness</b> - Techniques to enhance trustworthiness and credibility of data analysis (e.g., member checking, audit trail, triangulation); rationale**                                                                | 12-13        |

### Results/findings

|                      |                                                                                                                                                                                                   |             |
|----------------------|---------------------------------------------------------------------------------------------------------------------------------------------------------------------------------------------------|-------------|
| 23<br>24<br>25<br>26 | <b>Synthesis and interpretation</b> - Main findings (e.g., interpretations, inferences, and themes); might include development of a theory or model, or integration with prior research or theory | N/A         |
| 27<br>28<br>29       | <b>Links to empirical data</b> - Evidence (e.g., quotes, field notes, text excerpts, photographs) to substantiate analytic findings                                                               | Supp File 2 |

### Discussion

|                                  |                                                                                                                                                                                                                                                                                                                                                                                                             |       |
|----------------------------------|-------------------------------------------------------------------------------------------------------------------------------------------------------------------------------------------------------------------------------------------------------------------------------------------------------------------------------------------------------------------------------------------------------------|-------|
| 32<br>33<br>34<br>35<br>36<br>37 | <b>Integration with prior work, implications, transferability, and contribution(s) to the field</b> - Short summary of main findings; explanation of how findings and conclusions connect to, support, elaborate on, or challenge conclusions of earlier scholarship; discussion of scope of application/generalizability; identification of unique contribution(s) to scholarship in a discipline or field | 26-29 |
| 38<br>39                         | <b>Limitations</b> - Trustworthiness and limitations of findings                                                                                                                                                                                                                                                                                                                                            | 29    |

### Other

|                |                                                                                                                                               |              |
|----------------|-----------------------------------------------------------------------------------------------------------------------------------------------|--------------|
| 42<br>43<br>44 | <b>Conflicts of interest</b> - Potential sources of influence or perceived influence on study conduct and conclusions; how these were managed | 13-14, 27-28 |
| 45<br>46       | <b>Funding</b> - Sources of funding and other support; role of funders in data collection, interpretation, and reporting                      | 31           |

\*The authors created the SRQR by searching the literature to identify guidelines, reporting standards, and critical appraisal criteria for qualitative research; reviewing the reference lists of retrieved sources; and contacting experts to gain feedback. The SRQR aims to improve the transparency of all aspects of qualitative research by providing clear standards for reporting qualitative research.

1  
2  
3  
4  
5  
6  
7  
8  
9  
10  
11  
12  
13  
14  
15  
16  
17  
18  
19  
20  
21  
22  
23  
24  
25  
26  
27  
28  
29  
30  
31  
32  
33  
34  
35  
36  
37  
38  
39  
40  
41  
42  
43  
44  
45  
46  
47  
48  
49  
50  
51  
52  
53  
54  
55  
56  
57  
58  
59  
60

\*\*The rationale should briefly discuss the justification for choosing that theory, approach, method, or technique rather than other options available, the assumptions and limitations implicit in those choices, and how those choices influence study conclusions and transferability. As appropriate, the rationale for several items might be discussed together.

**Reference:**

O'Brien BC, Harris IB, Beckman TJ, Reed DA, Cook DA. **Standards for reporting qualitative research: a synthesis of recommendations.** *Academic Medicine*, Vol. 89, No. 9 / Sept 2014  
DOI: 10.1097/ACM.0000000000000388

For peer review only
