# Supplementary material for: What matters most to patients about primary healthcare: mixed-methods patient priority setting exercises within the PREFeR (PRioritiEs For Research) project
Source: PubMed Central journal article supplement — BMJ Open. 2019 Jul 9;9(7):e025954. doi: 10.1136/bmjopen-2018-025954 (PMC6624027; doi:10.1136/bmjopen-2018-025954), 2019-07-09
Supplement: bmjopen-2018-025954supp002.pdf [file bmjopen-2018-025954supp002.pdf]

## Researcher-suggested primary care topic headings compared to patient-revised topic headings

| Researcher-proposed topic headings                      | Patient-revised topic headings                                                             |
|---------------------------------------------------------|--------------------------------------------------------------------------------------------|
| 1) More patient-centred care needed                     | 1) Care guided by patient needs, values, preferences, and priorities                       |
| 2) Communication –<br>Informing/empowering patients     | 2) Informing and empowering patients                                                       |
| 3) Improving patient-provider communication             | 3) Improve and strengthen communication between patients and primary health care providers |
| 4) Electronic Medical Records (EMR)/information sharing | 4) Information sharing, including electronic medical records                               |
| 5) Resources to better manage one's own health          | 5) Resources to better manage one's own health                                             |
| 6) Prevention/early intervention                        | 6) Prevention/early intervention                                                           |
| 7) Inability to access regular family doctors (GPs)     | 7) Unable to find a regular family doctor or other primary health care provider            |

|                                                       |                                                                                                                |
|-------------------------------------------------------|----------------------------------------------------------------------------------------------------------------|
| 8) Inadequacy of walk-in clinics                      | 8) Inadequacy of compensation model<br>where doctors receive a set amount of money per visit (fee-for-service) |
| 9) Accessing after-hours care                         | 9) Accessing care where and when patients need it                                                              |
| 10) Access to specialist knowledge                    | 10) Access to specialist knowledge                                                                             |
| 11) Impact of a new diagnosis                         | 11) Support for living with chronic conditions                                                                 |
| 12) Care of chronic conditions                        |                                                                                                                |
| 13) Accessing mental health resources                 | 12) Mental health resources                                                                                    |
| 14) Challenges in small towns/cities                  | 13) Challenges in small towns/cities and remote areas                                                          |
| 15) Patient stigma                                    | 14) Addressing stigma and bias                                                                                 |
| 16) Gaps in clinical evidence/information             | 15) Knowledge gaps in clinical evidence and information                                                        |
| 17) Broaden roles for other health care professionals | 16) New models of primary care that include other health care professionals                                    |
| 18) Inefficient practices put pressure on the system  | 17) Improving continuity and coordination                                                                      |

|                            |                            |
|----------------------------|----------------------------|
| 19) No universal drug plan | 18) No universal drug plan |
|----------------------------|----------------------------|

Patient-revised topics and full list of bullet point examples and experiences from the interim priority setting workshop

### 1) Care guided by patient needs, values, preferences, and priorities

- “Block and tackle” approach to protecting territory (i.e., using defensive/offensive tactics), rather than patient-centred care
- Care needs to keep pace with patients’ expectations for information, especially in the context of widespread access to online information
- Need to embark on a journey of discovery with the patient
- Role of primary care provider is to be a coordinator of care in a team-based setting
- More holistic approach needed, where the whole body is treated, not just whatever particular part/system is ‘ill’
- Consideration of non-pharmacological options for treatment

### 2) Informing and empowering patients

- Information not explained to patient adequately
- Not all treatment options explained/offered, especially around alternative medicine
- Advice needs to be targeted in a way that patients know how to take action (don’t just give diagnosis)
- Information not clearly communicated to patients about how/why something being prescribed
- Treatment recommendations need to be appropriate for/tailored to the needs of the community (including low-income)
- Resources patients are directed to need to be appropriate and available based on needs of the community (including low-income)
- Guidance on red flags and when to seek care
- Strategies to address/accept ‘new normal’ after a new diagnosis
- Shock of new diagnosis may impair understanding/ability to ask questions during initial consultation
- Understanding individual patient priorities for their care and targeting care appropriately

### **3) Improve and strengthen communication between patients and primary health care providers**

- Patients may not describe underlying issue/relevant symptoms, but questioning could identify it
- Patients may not have time/ability to process information to ask all questions during a consultation
- Enhancing decision-making shared between patients and providers
- Addressing language barriers in care
- Use recap strategy to check understanding

### **4) Information sharing, including electronic medical records**

- Lack of coordinated information sharing between health care professionals (especially health authorities) means re-telling 'story' repeatedly & treatments/information given may never be known between health professionals and across settings including walk-in clinics, home-care, hospital
- Patients unable to access own EMR including clinical notes
- EMR often not reviewed before patient appointment, which leads to gaps in care
- Pharamnet works well in transferring prescription information between health authorities, but medical records don't similarly transfer
- Patient should not need to manage all of the communication within a care team
- Streamlined processes for patient-led consent and information sharing

### **5) Resources to better manage one's own health**

- No access to EMR including clinical notes
- Should be ability to access information without seeing PHC physician (e.g., patient portal, patient-led chronic disease programming)
- No resources to help understand what patients can do to manage their own health (knowing schedule for check-ups, screening etc.)
- Lack of patient knowledge of clinical guidelines
- Patients need help interpreting what is and what isn't evidence-based
- Clarity needed around what to do when new to the province
- Need for centralized repositories with quality resources and programs available, including support groups

## 6) Prevention/early intervention

- Preventative medicine and lifestyle management not prioritized
- When, why and which health care professionals should do screening
- Lack of early interventions leads to poorer outcomes and higher cost down the road
- Roles for other professionals in preventative health care and lifestyle management

## 7) Unable to find a regular family doctor or other primary health care provider

- Weighing up convenience of walk-in over desire to see GP
- Places pressure on the emergency department
- Patients feel like a “product of the system”
- Hard to navigate healthcare system
- Receptionists act as gatekeepers (but without providing enough information)
- More students need to go into family practice
- Environmental/natural disasters impact patient health, which puts even further pressure on the system

## 8) Inadequacy of compensation model where doctors receive a set amount of money per visit (fee-for-service)

- Often not possible to discuss multiple, interrelated issues (chronic conditions)
- Encourages walk-in clinic practice which does not meet patient needs
- Walk-in clinics –line ups for appointments are for long periods (not suitable for some patients/weather) & waiting space isn't adequate
- Need research to understand how to most effectively compensate physician

## 9) Accessing care where and when patients need it

- Few options for after-hours care
- Need for care in home and long-term care
- Suitability of waiting space and physical design of clinics

## 10) Access to specialist knowledge

- Need for rapid access to specialist care for specific questions
- Processes to get specialist information that reduce need for face-to-face access to a specialist

- Need to keep patient in-the-loop on communication between primary care and specialists
- Direct access to specialists to answer a question

### 11) Support for living with chronic conditions

- No support for management of a chronic disease without a family doctor
- Family GPs refusing to accept patients with 'complex' conditions & ethics/implications of this
- Difficult to get repeat prescriptions filled without family GP
- Limited time with physician and nurse, especially with chronic conditions
- GPs could notify patients of support programs to help cope, including peer-to-peer support
- Some conditions cause cognitive difficulties (e.g., memory problems, difficulty processing or not correctly interpreting information)
- After a course of treatment, patient left somewhat alone dealing with side effects & feeling of being on own
- Can be long intervals between appointments & patient can 'feel lost' in this time interval
- Patient and doctor misconceptions likely with understanding condition/treatments
- Differentiation between chronic conditions and acquired conditions and recognition that there isn't always a causal relationship between them
- Continuity of care is essential in the context of chronic disease
- Clear communication of prognosis and pathway of care going forward, including the spectrum of possibilities

### 12) Mental health resources

- Often limited or no availability of resources for mental health and substance use needs
- Gap between primary care and specialists services, particularly in the absence of a diagnosis
- Information needed on how to access mental health and substance use resources
- Primary care physicians (and Emergency doctors) not qualified to manage complex mental health needs, so patients access acute care more often
- Co-existence of mental health and physical conditions poorly managed

### 13) Challenges in small towns/cities and remote areas

- Primary care doctors need to do more, since there are fewer specialists in small towns/cities
- Transportation needs must be considered
- Improved access to specialists also needed
- Less access to diagnostic testing
- Less choice/availability for doctors/treatments, which has larger impact on 'complex' conditions
- Privacy/stigma issues in rural areas (e.g., prescription pick-up)

### 14) Addressing stigma and bias

- Cultural safety and competency
- Community sensitivities
- Care for LGBTQ communities
- Stigma particular to transgender community
- Assumptions made based on health condition/background/socioeconomic status
- Effects of terminology, diagnoses, etc.
- Impact of stigma and bias on patient outcomes

### 15) Knowledge gaps in clinical evidence and information

- Issues of consistency across doctors when seeing multiple providers and levels of expertise (of GPs)
- GPs appear uncertain of correct course of care, or reluctant to perform procedures (provide clinical 'judgement')
- Knowledge and application of clinical guidelines
- Continuing education for practicing professionals
- Need to study who responds, not just the treatments themselves
- Treatment recommendations need to be appropriate for/tailored to the needs of the community (including low-income)
- Speed of implementation of scientific research (17 years) needs to be improved
- Patients want new treatments now, even though full evidence base may not be there
- Patients aware of differences in treatments between provinces and countries and want access to full set of options
- Scientific/research models only useful insofar as they predict outcomes in the real world – Magnitude of effect needs to be considered

## 16) New models of primary care including other health care professionals

- Need for better collaboration and cooperation among health care professionals and health disciplines
- Expanded roles for other health care professionals
- Better support needed for caregivers and home support workers, including respite care

## 17) Improving continuity and coordination

- Care outside of office (long-term care, home care) and outside of office hours is needed to ensure continuity
- Reluctance to renew prescriptions for more than three months
- Unnecessary appointments required to access services (e.g. vaccinations, physiotherapists)
- New questions occur to patients after an appointment, but no one to ask/have to make a new appointment to have these questions answered
- Emergency respondents appear well-trained, but often involves 4-6 health professionals
- Patients discharged from secondary care without ensuring adequate services in place (transportation, clean/safe home, family pressure/stress)

## 18) No universal drug plan

- Patients' limitations, needs & affordability/financial issues must be taken into account
  - Some 'over-the-counter' products are cheaper
  - Patients may skip/halve medications (appear non-adherent, but can't afford 'as prescribed')
  - Lack of coverage for prescription drugs puts pressure on the system elsewhere
- Difficulties with pharmacies inputting out-of-province information (when new to BC)
- Education for primary care providers on cost of prescription drugs to guide prescribing decisions
