# Supplementary material for: What matters most to patients about primary healthcare: mixed-methods patient priority setting exercises within the PREFeR (PRioritiEs For Research) project
Source: PubMed Central journal article supplement — BMJ Open. 2019 Jul 9;9(7):e025954. doi: 10.1136/bmjopen-2018-025954 (PMC6624027; doi:10.1136/bmjopen-2018-025954), 2019-07-09
Supplement: bmjopen-2018-025954supp003.pdf [file bmjopen-2018-025954supp003.pdf]

Patient-ranked raw scores (n=9) for primary care topics and methods of tabulating the top 10 priority topics

| Topic <sup>1</sup>                | Ranked scores by patients <sup>2</sup>                        |    |   |   |   |    |   |    |    | Sum of scores | Ranked priority (via scores) | Relative importance (%) <sup>3</sup> | Number of votes | Final ranked priority (via scores & votes) |
|-----------------------------------|---------------------------------------------------------------|----|---|---|---|----|---|----|----|---------------|------------------------------|--------------------------------------|-----------------|--------------------------------------------|
|                                   | 1                                                             | 2  | 3 | 4 | 5 | 6  | 7 | 8  | 9  |               |                              |                                      |                 |                                            |
|                                   | Care guided by patient needs, values, preferences, priorities | 7  |   | 9 |   | 10 |   | 10 | 8  |               |                              |                                      |                 |                                            |
| Information sharing, EMR          | 5                                                             | 1  | 8 | 6 | 5 |    | 7 | 6  | 8  | 46            | 2                            | 9.3                                  | 8               | 2                                          |
| Unable to find a doctor           |                                                               | 10 | 3 |   |   | 10 | 4 | 5  | 10 | 42            | 3                            | 8.5                                  | 6               | 3                                          |
| Accessing care when, where needed | 9                                                             | 7  | 4 | 3 | 2 | 8  | 3 |    | 5  | <b>41</b>     | <b>4</b>                     | <b>8.3</b>                           | <b>8</b>        | <b>4</b>                                   |
| Support for chronic conditions    |                                                               | 8  | 1 | 8 |   | 6  | 2 | 10 | 6  | <b>41</b>     | <b>4</b>                     | <b>8.3</b>                           | <b>7</b>        | <b>5</b>                                   |
| Mental health resources           | 8                                                             | 4  |   | 4 | 8 | 1  |   | 3  | 9  | 37            | 6                            | 7.5                                  | 7               | 6                                          |
| New models of primary care        | 10                                                            |    | 6 | 2 | 7 | 9  |   |    |    | 34            | 7                            | 6.9                                  | 5               | 7                                          |

|                                                        |   |    |    |   |   |   |    |           |           |            |            |           |
|--------------------------------------------------------|---|----|----|---|---|---|----|-----------|-----------|------------|------------|-----------|
| Improving continuity, coordination                     | 6 | 5  | 9  | 7 | 2 | 4 | 33 | 8         | 6.7       | 6          | 8          |           |
| Challenges in small towns/cities                       | 2 | 5  | 7  |   | 5 | 9 | 2  | 30        | 9         | 6.1        | 6          | 9         |
| Improve, strengthen patient-<br>provider communication | 4 |    | 2  | 7 | 2 | 8 | 4  | <b>27</b> | <b>10</b> | <b>5.5</b> | <b>6</b>   | <b>10</b> |
| Informing, empowering patients                         |   |    |    | 1 | 6 | 4 | 9  | 7         | <b>27</b> | <b>10</b>  | <b>5.5</b> | <b>5</b>  |
| Prevention/early intervention                          | 3 |    |    | 9 | 5 |   |    | 17        |           |            | 3          |           |
| Inadequacy of compensation model                       | 3 | 10 |    | 3 |   |   | 1  | 17        |           |            | 4          |           |
| No universal drug plan                                 |   |    | 10 | 4 |   |   | 3  | 17        |           |            | 3          |           |
| Resources to better manage health                      | 9 |    |    |   | 6 |   |    | 15        |           |            | 2          |           |
| Knowledge gaps in clinical evidence                    | 6 |    |    | 1 |   | 1 |    | 8         |           |            | 3          |           |
| Access to specialist knowledge                         |   |    | 5  |   | 1 |   |    | 6         |           |            | 2          |           |
| Addressing stigma and bias                             | 1 | 2  |    |   | 3 |   |    | 6         |           |            | 3          |           |

---

EMR = electronic medical record. Bold values indicate topics with ties.

<sup>1</sup> Topic headings have been shortened here for presentation ease. Refer to Supplementary file 2, column 2 for full topic headings.

<sup>2</sup> Ranked scores have been reverse scored, where 1=Least important and 10=Most important.

<sup>3</sup> Relative importance = [(topic score) / (maximum points for the group; i.e., number of patients (9) x 55 points) x 100]. The total of 55 points is derived from the sum of the 10 ranks (1+2+3+4+5+6+7+8+9+10).
